# Supplementary material for: Design, synthesis, and anticancer assessment of structural analogues of (E)-1-((3,4,5-trimethoxybenzylidene)amino)-4-(3,4,5-trimethoxyphenyl)imidazo[1,2-a]quinoxaline-2-carbonitrile (6b), an imidazo[1,2-a]quinoxaline-based non-covalent EGFR inhibitor
Source: Royal Society of Chemistry journal article supplement (doi:10.1039/d4md00237g), 2024-01-01
Supplement: d4md00237g1.pdf [file d4md00237g1.pdf]

## Design, synthesis, and anticancer assessment of structural analogues of (E)-1-((3,4,5-trimethoxybenzylidene)amino)-4-(3,4,5-trimethoxyphenyl)imidazo[1,2-*a*]quinoxaline-2-carbonitrile (6b), an imidazo[1,2-*a*]quinoxaline-based non-covalent EGFR Inhibitor

Manvendra Kumar<sup>1</sup>, Kiran Patil<sup>1</sup>, Pritam Maity<sup>1</sup>, Joydeep Chatterjee<sup>1</sup>, Tashvinder Singh<sup>2</sup>, Gaurav Joshi<sup>1</sup>, Sandeep Singh<sup>\*2</sup>, and Raj Kumar<sup>\*1</sup>

1. Laboratory for Drug Design and Synthesis, Department of Pharmaceutical Sciences and Natural Products, School of Health Sciences, Central University of Punjab, Bathinda 151401, India

2. Department of Human Genetics and Molecular Medicine, Central University of Punjab, Bathinda- 151401 Punjab, India

\*Correspondence: Email: raj.khunger@gmail.com; raj.khunger@cup.edu.in (RK; ORCID ID: or-cid.org/0000-0001-5113-6627); sandeepsingh82@gmail.com (SS)

### Table of Contents (Page)

1. **Figure S1.** Pie chart of possible target prediction by Swiss Target Prediction tool (<http://www.swisstargetprediction.ch/>) of synthetics  
A. 5a B. 5e C. 5h, D. 5l and E. 5o (Page S2)
2. **Figure S2.** 2D interactions of 6b (A), 5a (B) and 5v (C) in the binding pocket of EGFRWT (PDB:1M17) (Page-S3)
3. **Table. S1:** Antiproliferative potential of target compounds (Page-S4)
4. <sup>1</sup>H, <sup>13</sup>C and HRMS Spectra (Page-S6)

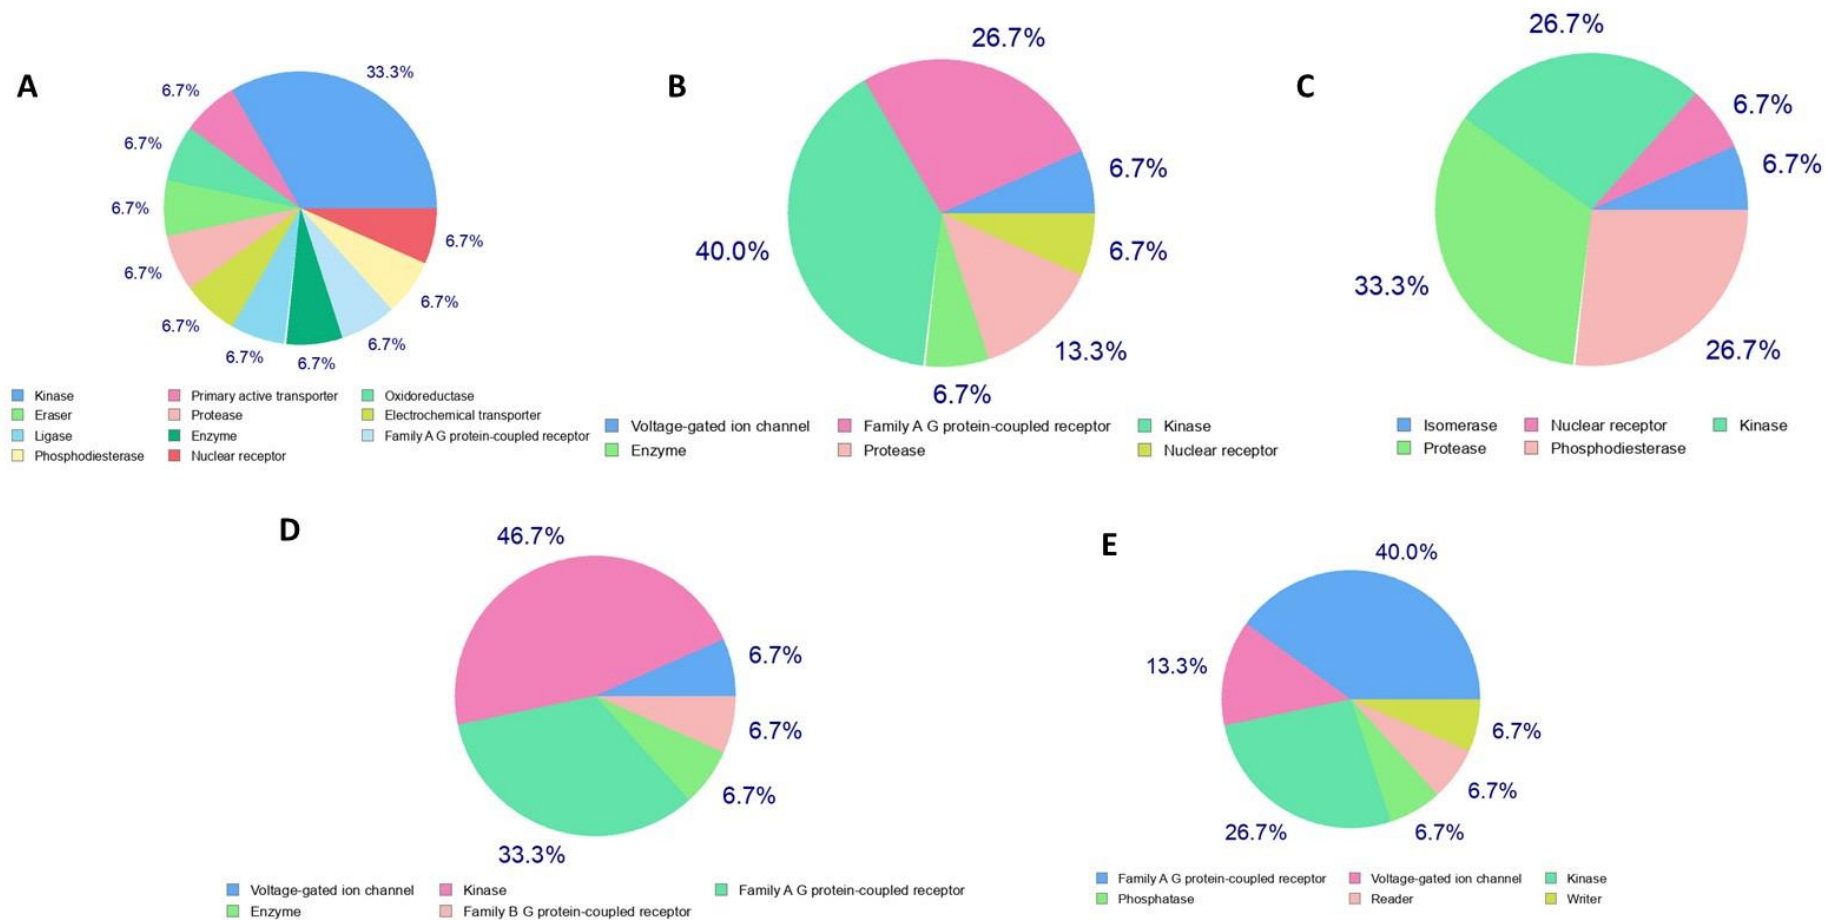

**Figure S1.** Pie chart of possible target prediction by Swiss Target Prediction tool (<http://www.swisstargetprediction.ch/>) of synthetics (A) 5a (B) 5e (C) 5h, (D) 5l and (E) 5o

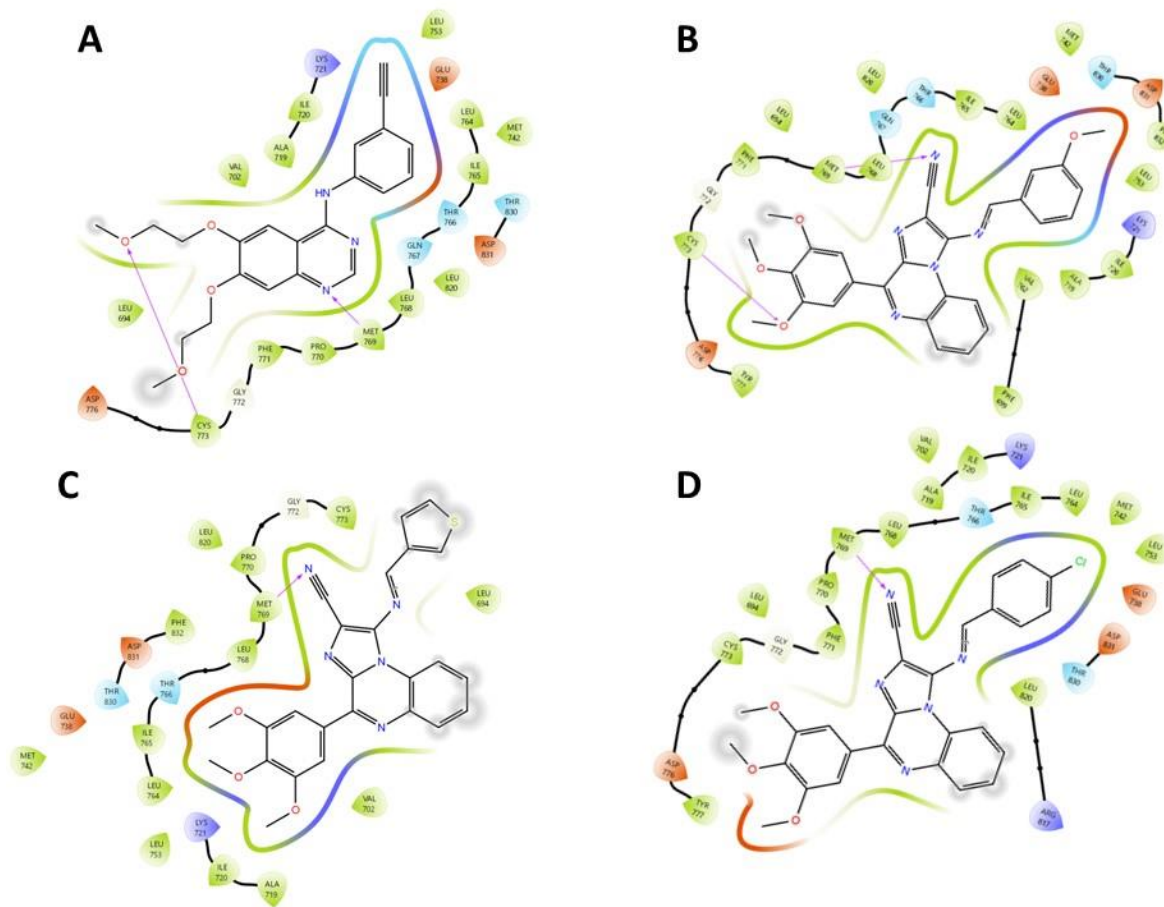

**Figure S2.** 2D interactions of **6b** (A), **5a** (B) and **5v** (C) in the binding pocket of EGFR<sub>WT</sub> (PDB:1M17)

**Table S1:** Antiproliferative potential of target compounds

| S.No. | Compound Code    | IC <sub>50</sub> (μM) |             |            |
|-------|------------------|-----------------------|-------------|------------|
|       |                  | A549                  | MCF7        | MDA-MB-231 |
| 1.    | <b>Erlotinib</b> | 4,68                  | >10         | >10        |
| 2.    | <b>MRP-1</b>     | 21.15                 | 10.97±0.08  | 13.8±0.04  |
| 3.    | <b>5a</b>        | 3.53±0.03             | 13.58±0.10  | 5.77±0.03  |
| 4.    | <b>5b</b>        | 15.49±0.09            | 15.86±0.08  | 15.58±0.08 |
| 5.    | <b>5c</b>        | 15.18±0.04            | 10.82±0.23  | 15.18±0.05 |
| 6.    | <b>5d</b>        | >25                   | 4.16±0.16   | 13.23±0.09 |
| 7.    | <b>5e</b>        | 4.43±0.08             | 3.82±0.14   | 5.94±0.04  |
| 8.    | <b>5f</b>        | 11.01±0.06            | 15.47±0.13  | 9.48±0.06  |
| 9.    | <b>5g</b>        | 14.12±0.09            | 9.89±0.23   | 14.72±0.02 |
| 10.   | <b>5h</b>        | 3.25±0.02             | 9.99±0.15   | 11.36±0.04 |
| 11.   | <b>5i</b>        | 5.05±0.10             | 15.545±0.24 | 12.91±0.06 |
| 12.   | <b>5j</b>        | 8.65±0.06             | 12.558±0.13 | 19.47±0.03 |
| 13.   | <b>5k</b>        | >25                   | 17.42±0.07  | 24.66±0.04 |
| 14.   | <b>5l</b>        | 1.34±0.04             | 14.30±0.30  | >25        |
| 15.   | <b>5m</b>        | 11.67±0.13            | 17.69±0.26  | 16.3±0.18  |
| 16.   | <b>5n</b>        | 15.03±0.22            | 15.68±0.54  | 22.41±0.12 |
| 17.   | <b>5o</b>        | 4.27±0.14             | 23.85±0.24  | 8.661±0.11 |
| 18.   | <b>5p</b>        | >25                   | 8.99±0.12   | >25        |
| 19.   | <b>5q</b>        | 16.49±0.39            | 13.14±0.43  | 8.88±0.14  |
| 20.   | <b>5r</b>        | >25                   | 20.28±0.05  | >25        |
| 21.   | <b>5s</b>        | 14.79±0.11            | >25         | 8.76±0.06  |
| 22.   | <b>5t</b>        | 19.96±0.32            | 27.68±0.33  | 21.47±0.30 |
| 23.   | <b>5u</b>        | 15.35±0.16            | >25         | 21.01±0.39 |
| 24.   | <b>5v</b>        | 10.38±0.19            | 11.66±0.08  | 15.14±0.09 |
| 25.   | <b>5w</b>        | 24.3±0.10             | 19.48±0.15  | 21.42±0.12 |
| 26.   | <b>5x</b>        | 13.17±0.14            | 24.04±0.12  | 6.41±0.13  |
| 27.   | <b>5y</b>        | 9.95±0.08             | 11.24±0.06  | 14.74±0.1  |
| 28.   | <b>5z</b>        | 18.6±0.29             | >25         | 17.65±0.19 |
| 29.   | <b>5aa</b>       | >25                   | >25         | >25        |



|     |            |            |            |     |
|-----|------------|------------|------------|-----|
| 30. | <b>5ab</b> | 16.44±0.08 | 19.15±0.1  | >25 |
| 31. | <b>5ac</b> | >25        | 18.94±0.07 | >25 |

# Spectral data of compound MRP-1

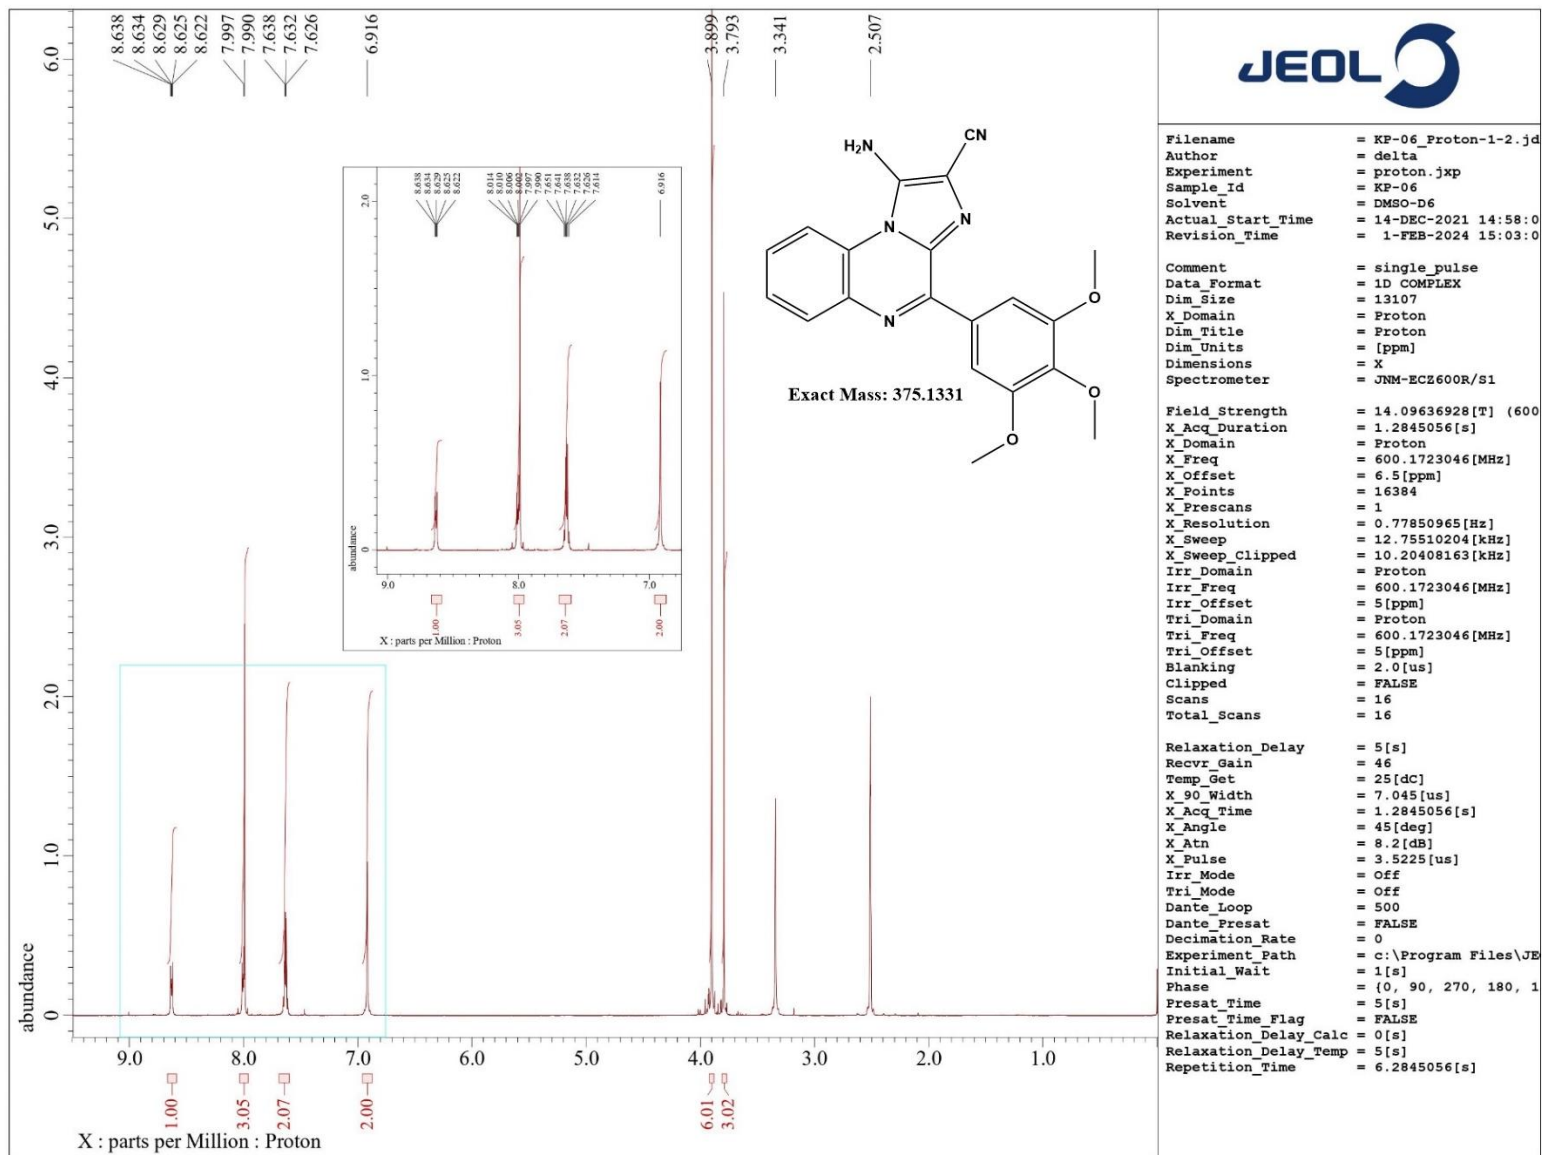

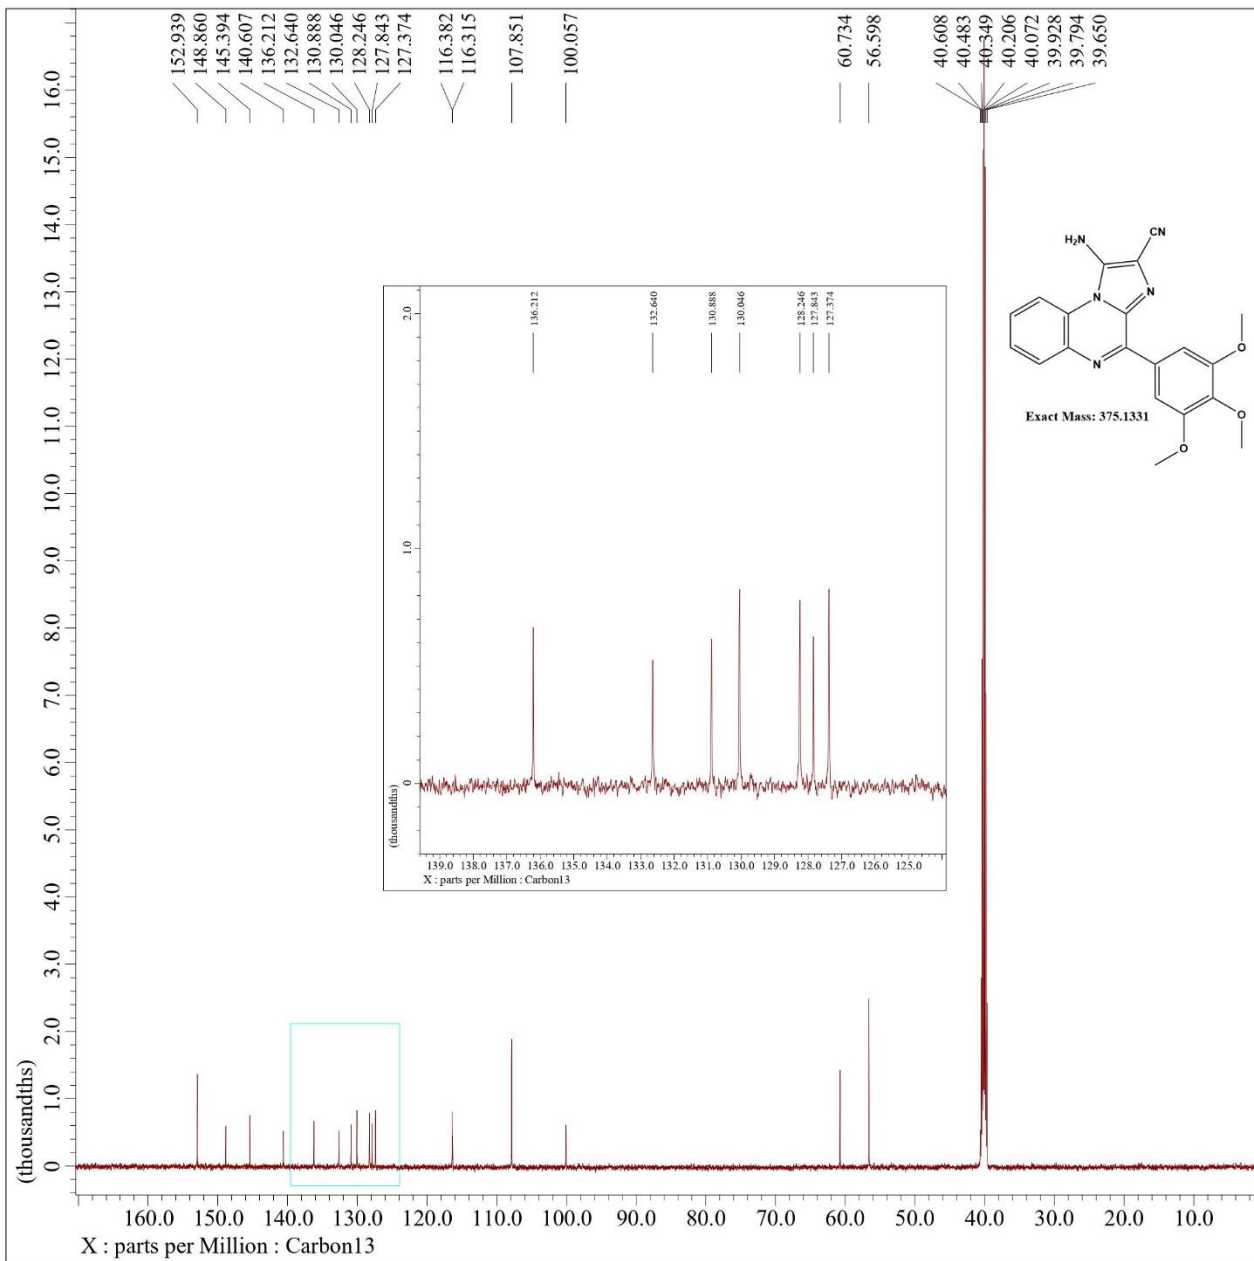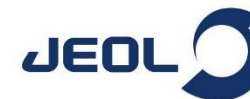

```

Filename           = KF-06_Carbon-1-2
Author             = delta
Experiment         = carbon.jxp
Sample_Id         = KF-06
Solvent           = DMSO-D6
Actual_Start_Time = 14-DEC-2021 15:0
Revision_Time     = 1-FEB-2024 15:0

Comment           = single pulse dec
Data Format       = 1D COMPLEX
Dim_Size         = 26214
X_Domain        = Carbon13
Dim_Title       = Carbon13
Dim_Units       = [ppm]
Dimensions      = X
Spectrometer    = JNM-ECZ600R/S1

Field Strength   = 14.09636928[T] (
X_Acq_Duration  = 0.69206016[s]
X_Domain        = Carbon13
X_Freq          = 150.91343039[MHz]
X_Offset        = 100[ppm]
X_Points        = 32768
X_Prescans      = 4
X_Resolution    = 1.44496109[Hz]
X_Sweep         = 47.34848485[kHz]
X_Sweep_Clipped = 37.87878788[kHz]
Irr_Domain      = Proton
Irr_Freq        = 600.1723046[MHz]
Irr_Offset      = 5[ppm]
Blanking        = 2.0[us]
Clipped         = FALSE
Scans           = 512
Total_Scans     = 512

Relaxation_Delay = 2[s]
Recvr_Gain       = 36
Temp_Get         = 25[dC]
X_90_Width      = 11.025[us]
X_Acq_Time      = 0.69206016[s]
X_Angle         = 30[deg]
X_Atn           = 10.4[dB]
X_Pulse         = 3.675[us]
Irr_Atn_Dec     = 28.859[dB]
Irr_Atn_Dec_Calc = 28.859[dB]
Irr_Atn_Dec_Default_Calc = 28.859[dB]
Irr_Atn_Noise   = 28.859[dB]
Irr_Dec_Bandwidth_Hz = 7.23684211[kHz]
Irr_Dec_Bandwidth_Ppm = 12.05794078[ppm]
Irr_Dec_Freq    = 600.1723046[MHz]
Irr_Dec_Merit_Factor = 2.2
Irr_Decoupling = TRUE
Irr_Noise       = TRUE
Irr_Noise       = WALTZ
Irr_Offset_Default = 5[ppm]
Irr_Pwidth      = 76[us]
Irr_Pwidth_Default = 76[us]
Irr_Pwidth_Default_Calc = 76[us]
Irr_Pwidth_Templ = 76[us]
Irr_Wurst       = FALSE
Decimation_Rate = 0
Experiment_Path = c:\Program Files
Initial_Wait    = 1[s]
Noe_Time        = 2[s]

```



# Spectral data of compound 5a

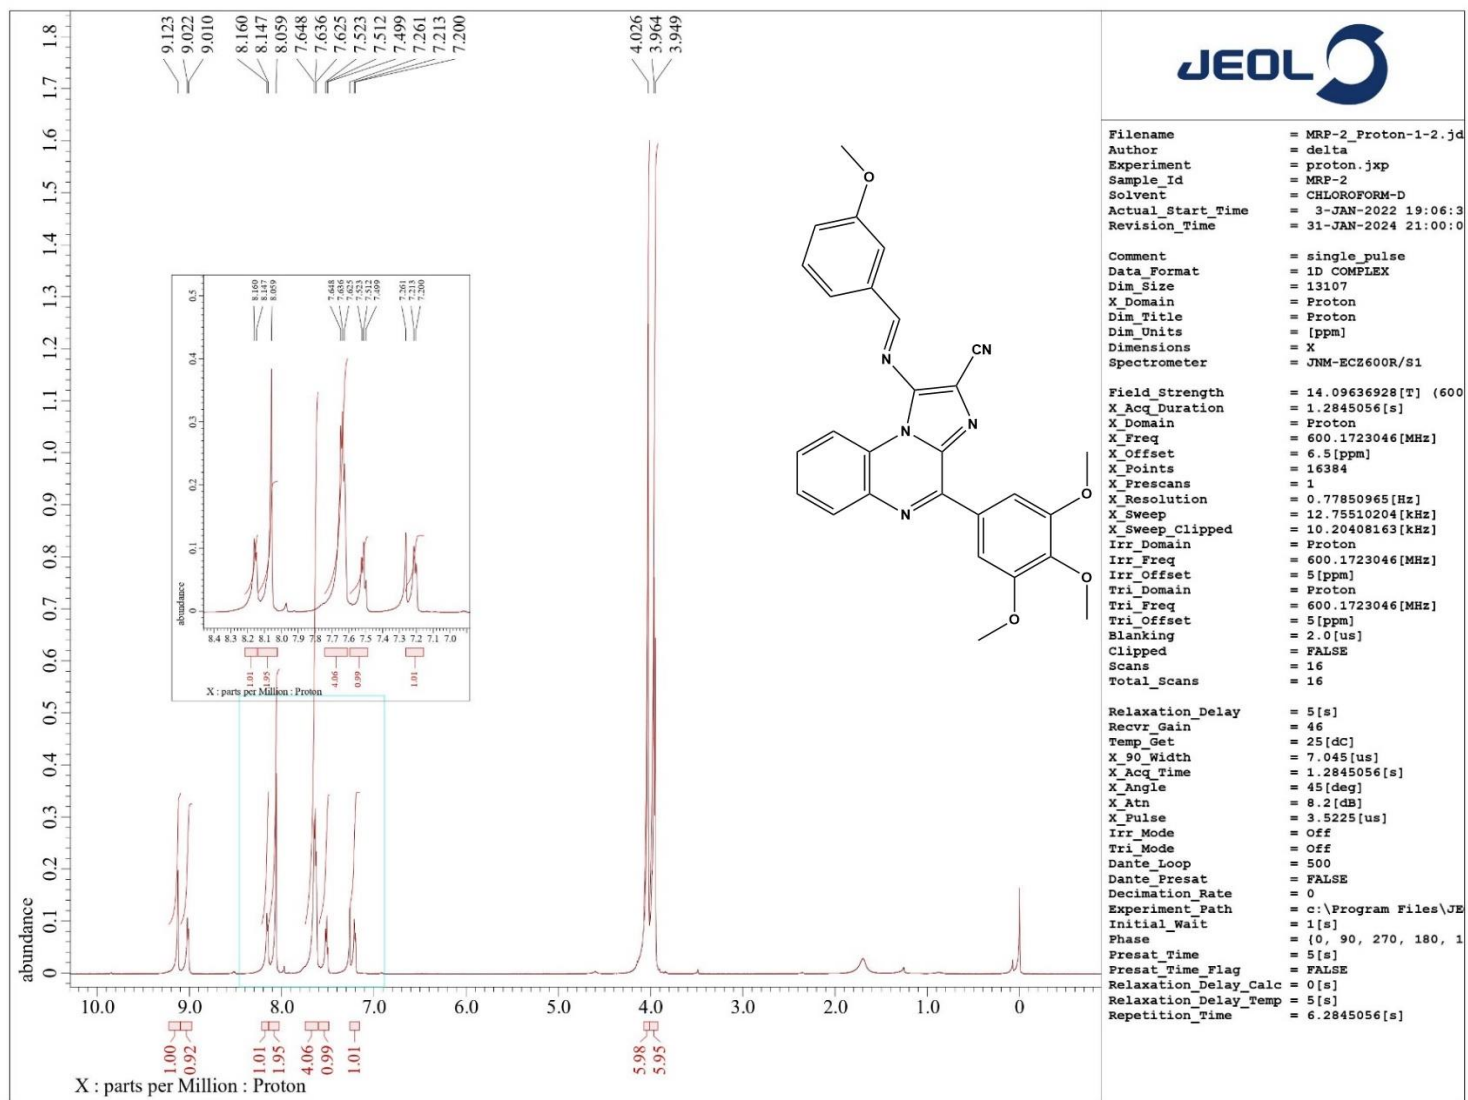

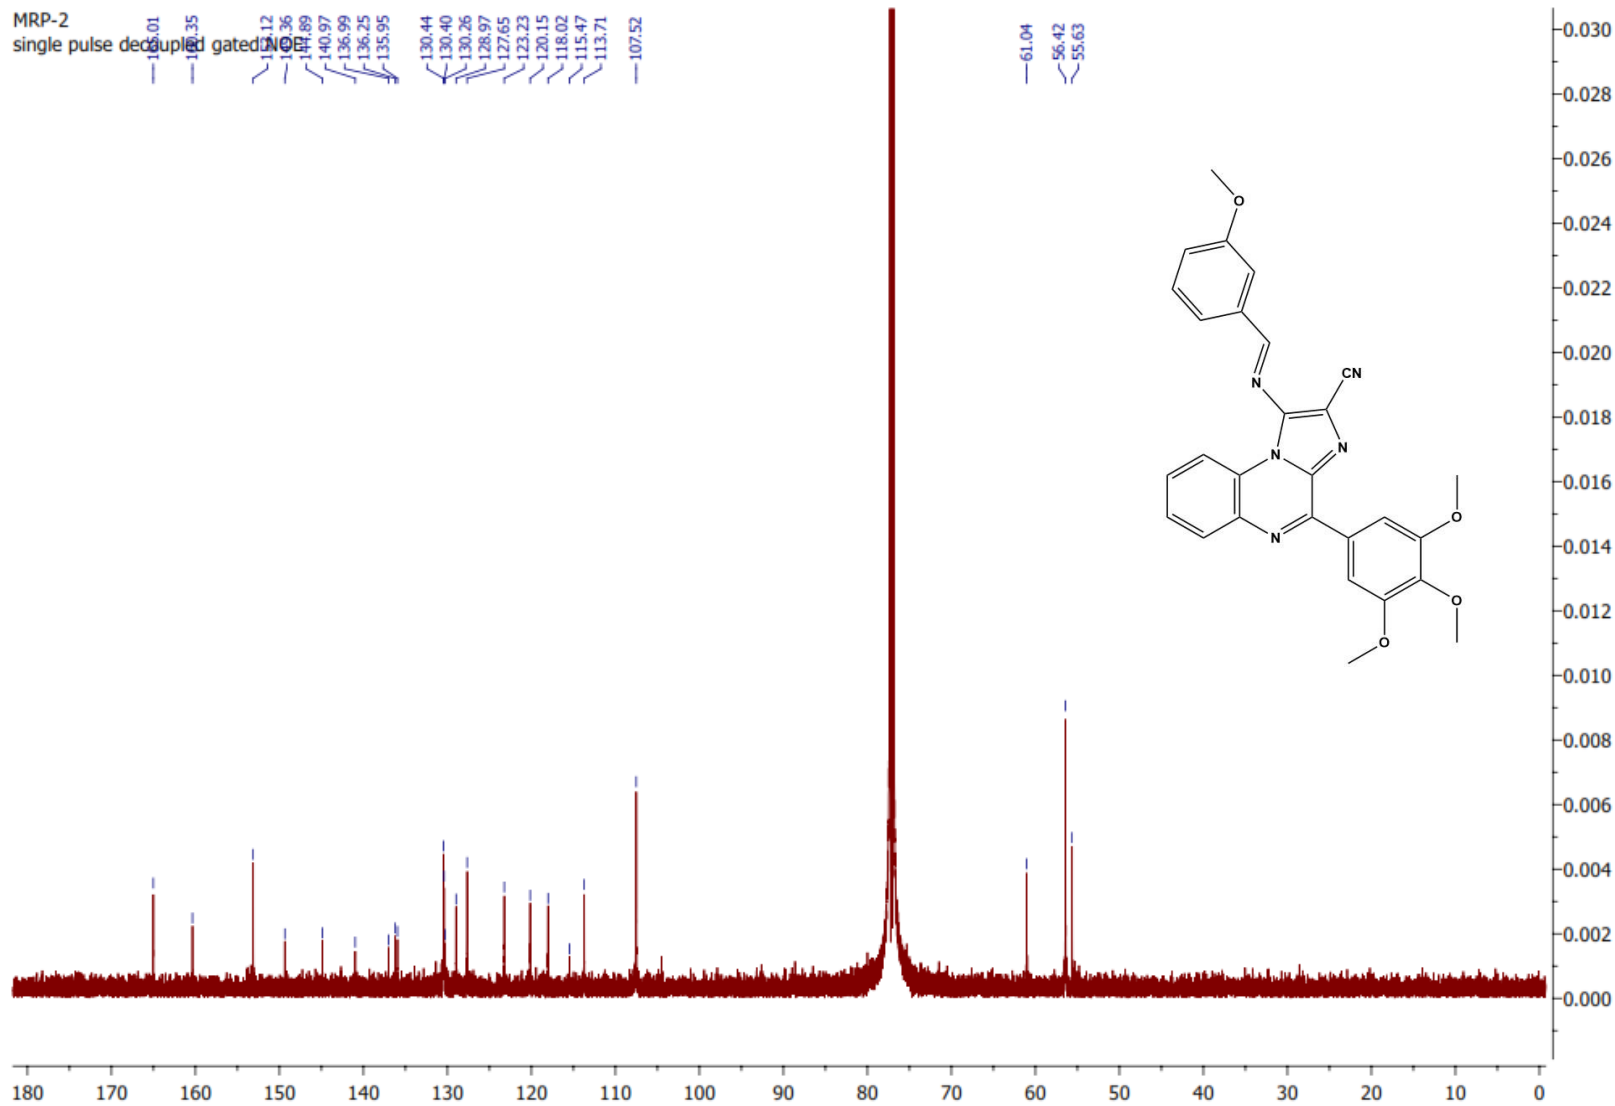

# Elemental Composition Report

## Single Mass Analysis

Tolerance = 10.0 PPM / DBE: min = -1.5, max = 50.0

Element prediction: Off

Number of isotope peaks used for i-FIT = 5

Monoisotopic Mass, Even Electron Ions

1608 formula(e) evaluated with 9 results within limits (up to 1 closest results for each mass)

Elements Used:

C: 0-50 H: 0-100 N: 0-10 O: 0-10 Br: 0-2

Sample Name : MRP\_2  
Test Name :  
23032022\_MRP\_2\_9 (0.203)

IITRPR

XEVO G2-XS QTOF

1: TOF MS ES+  
1.87e+007

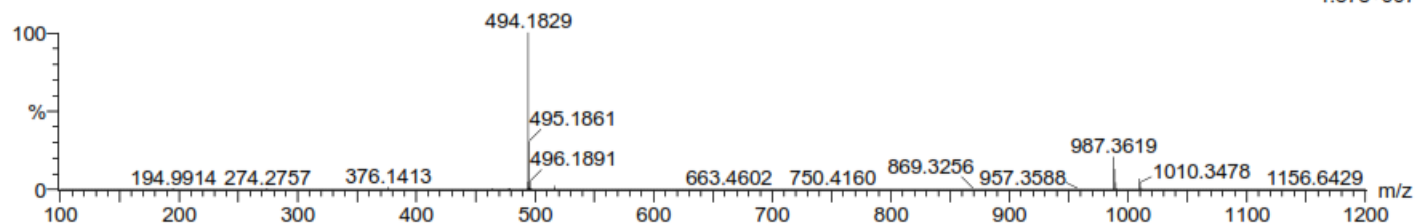

Minimum: -1.5  
Maximum: 2.0 10.0 50.0

| Mass     | Calc. Mass | mDa | PPM | DBE  | i-FIT  | Norm | Conf(%) | Formula       |
|----------|------------|-----|-----|------|--------|------|---------|---------------|
| 494.1829 | 494.1828   | 0.1 | 0.2 | 19.5 | 1154.2 | n/a  | n/a     | C28 H24 N5 O4 |

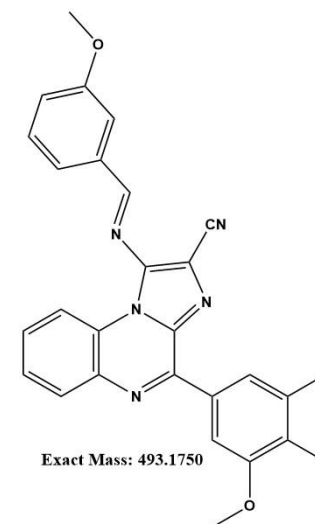

# Spectral data of compound 5b

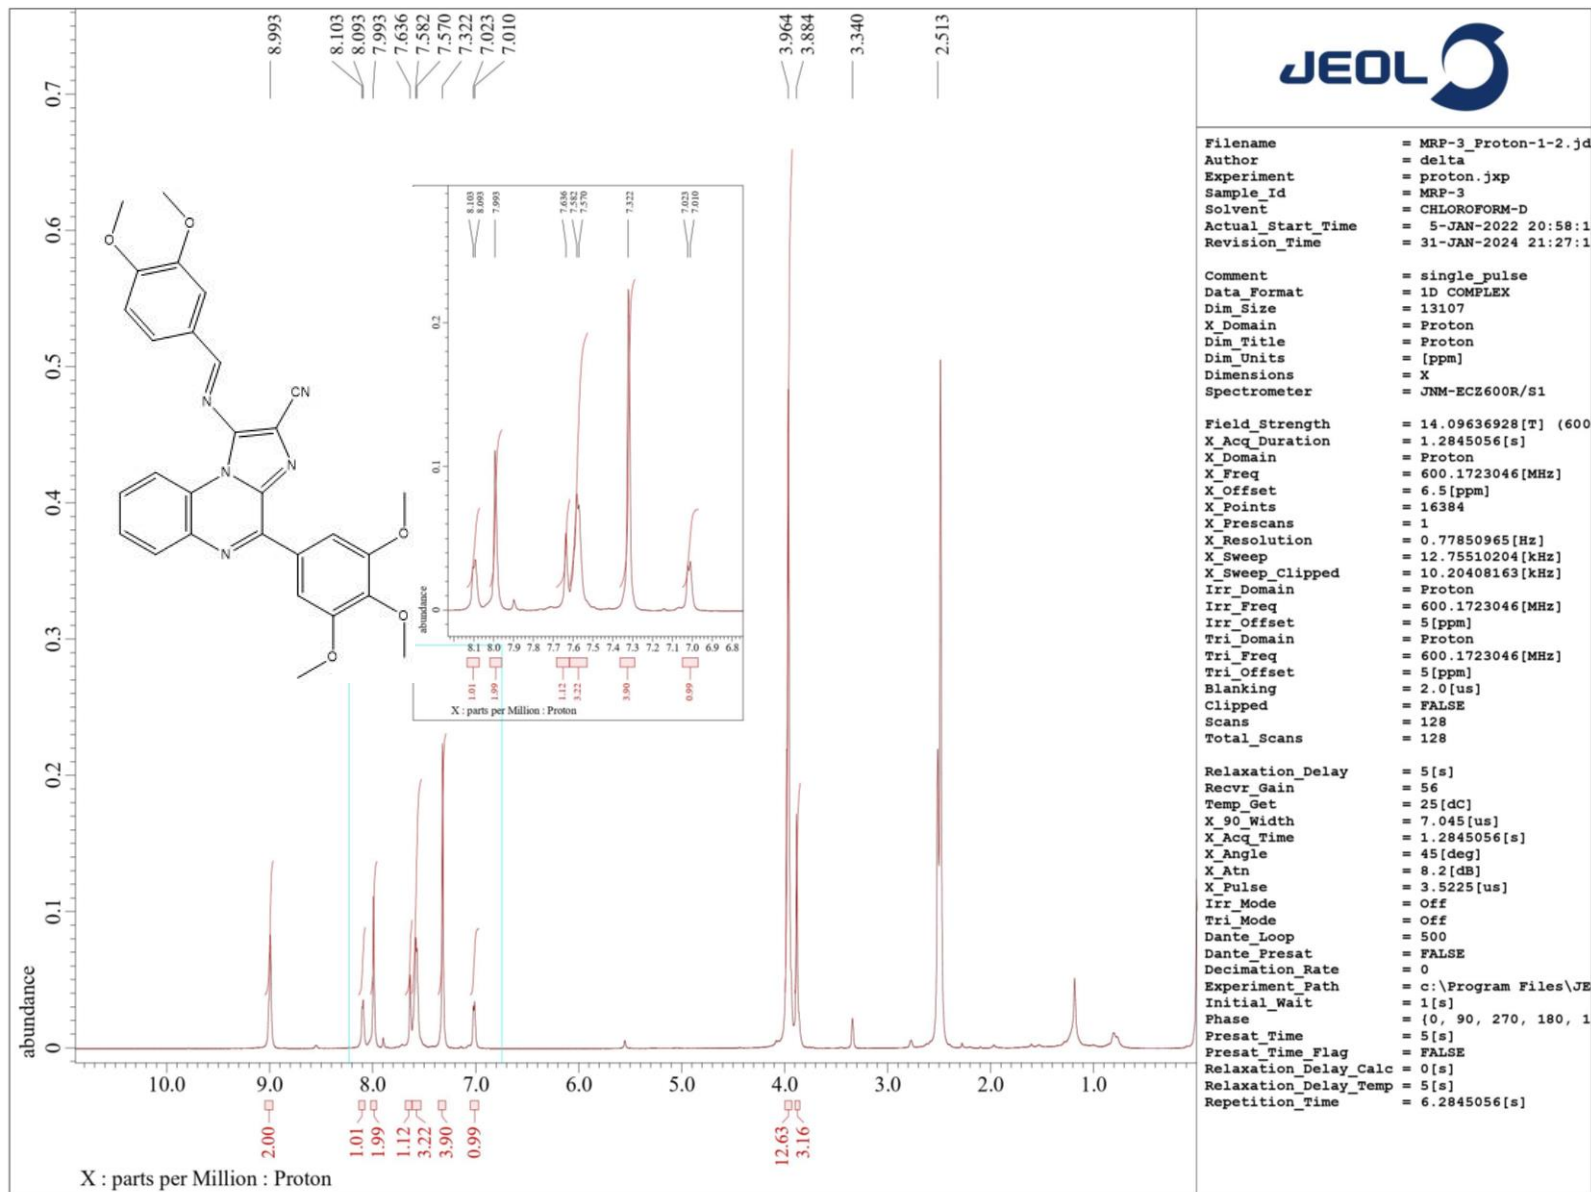



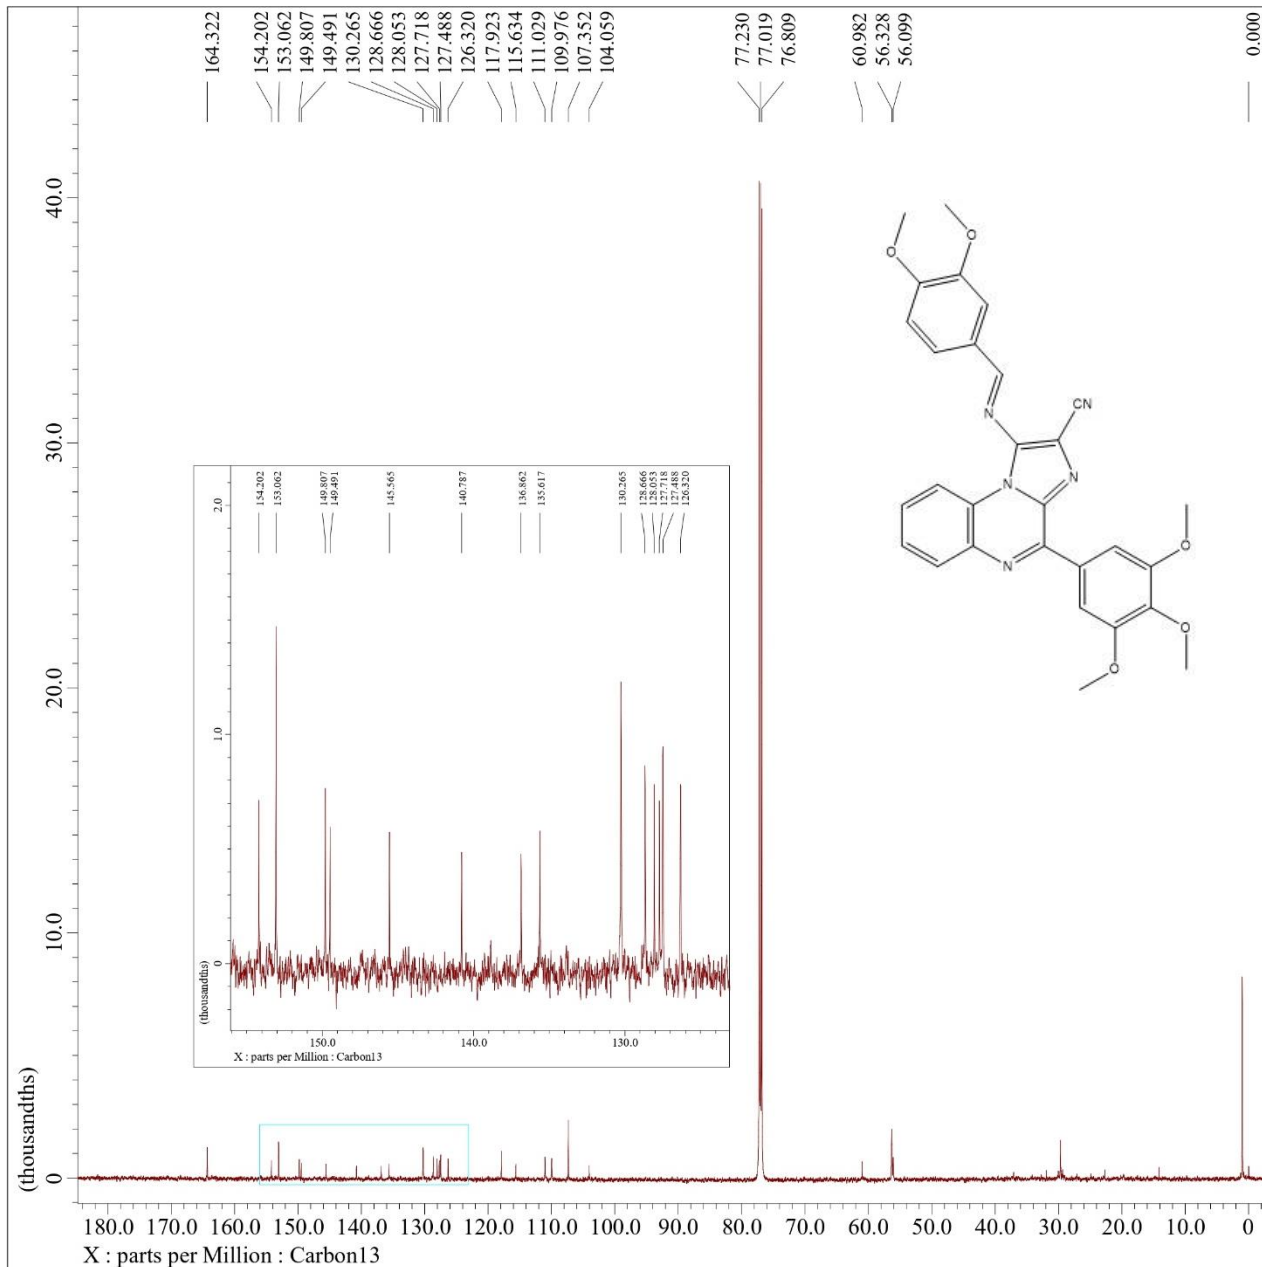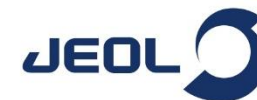

|                          |                     |
|--------------------------|---------------------|
| Filename                 | = 5B_Carbon-1-1 (1  |
| Author                   | = delta             |
| Experiment               | = carbon.jxp        |
| Sample_Id                | = 5B                |
| Solvent                  | = CHLOROFORM-D      |
| Actual_Start_Time        | = 13-MAY-2024 21:1  |
| Revision_Time            | = 23-MAY-2024 10:3  |
| Comment                  | = single pulse dec  |
| Data_Format              | = 1D_COMPLEX        |
| Dim_Size                 | = 26214             |
| X_Domain                 | = Carbon13          |
| Dim_Title                | = Carbon13          |
| Dim_Units                | = [ppm]             |
| Dimensions               | = X                 |
| Spectrometer             | = JNM-ECZ600R/S1    |
| Field_Strength           | = 14.09636928[T] (  |
| X_Acq_Duration           | = 0.34603008[s]     |
| X_Domain                 | = Carbon13          |
| X_Freq                   | = 150.91343039[MHz  |
| X_Offset                 | = 100 [ppm]         |
| X_Points                 | = 16384             |
| X_Prescans               | = 4                 |
| X_Resolution             | = 2.88992217 [Hz]   |
| X_Sweep                  | = 47.34848485 [kHz] |
| X_Sweep_Clippped         | = 37.87878788 [kHz] |
| Irr_Domain               | = Proton            |
| Irr_Freq                 | = 600.1723046 [MHz] |
| Irr_Offset               | = 5 [ppm]           |
| Blanking                 | = 2.0 [us]          |
| Clipped                  | = TRUE              |
| Scans                    | = 5120              |
| Total_Scans              | = 5120              |
| Relaxation_Delay         | = 2 [s]             |
| Recvr_Gain               | = 56                |
| Temp_Get                 | = 21.1 [dC]         |
| X_90_Width               | = 11.25 [us]        |
| X_Acq_Time               | = 0.34603008 [s]    |
| X_Angle                  | = 30 [deg]          |
| X_Atn                    | = 10.4 [dB]         |
| X_Pulse                  | = 3.75 [us]         |
| Irr_Atn_Dec              | = 28.75 [dB]        |
| Irr_Atn_Dec_Calc         | = 28.75 [dB]        |
| Irr_Atn_Dec_Default_Calc | = 28.75 [dB]        |
| Irr_Atn_Noec             | = 28.75 [dB]        |
| Irr_Dec_Bandwidth_Hz     | = 7.23684211 [kHz]  |
| Irr_Dec_Bandwidth_Ppm    | = 12.05794078 [ppm] |
| Irr_Dec_Freq             | = 600.1723046 [MHz] |
| Irr_Dec_Merit_Factor     | = 2.2               |
| Irr_Decoupling           | = TRUE              |
| Irr_Noec                 | = TRUE              |
| Irr_Noise                | = WALTZ             |
| Irr_Offset_Default       | = 5 [ppm]           |
| Irr_Pwidth               | = 76 [us]           |
| Irr_Pwidth_Default       | = 76 [us]           |
| Irr_Pwidth_Default_Calc  | = 76 [us]           |
| Irr_Pwidth_Templ         | = 76 [us]           |
| Irr_Wurst                | = FALSE             |
| Decimation_Rate          | = 0                 |
| Experiment_Path          | = c:\Program Files  |
| Initial_Wait             | = 1 [s]             |
| Noe_Time                 | = 2 [s]             |

## Elemental Composition Report

### Single Mass Analysis

Tolerance = 10.0 PPM / DBE: min = -1.5, max = 50.0

Element prediction: Off

Number of isotope peaks used for i-FIT = 5

Monoisotopic Mass, Even Electron Ions

1737 formula(e) evaluated with 13 results within limits (up to 1 closest results for each mass)

Elements Used:

C: 0-50 H: 0-100 N: 0-10 O: 0-10 Br: 0-2

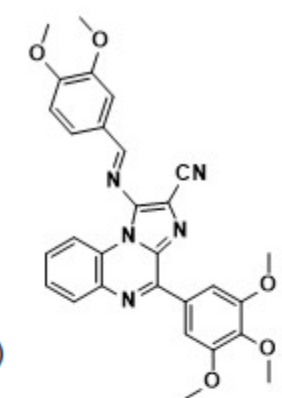

m/z: 523.1856 (100.0%)

Sample Name : MRP\_3  
 Test Name :  
 23032022\_MRP\_3 8 (0.186)

IITRPR

XEVO G2-XS QTOF

1: TOF MS ES+  
 3.27e+007

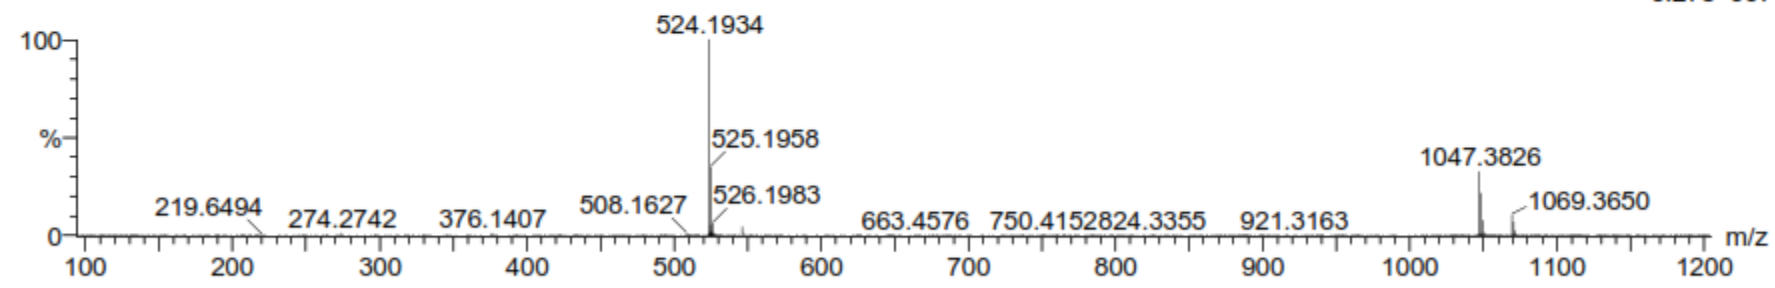

Minimum: -1.5  
 Maximum: 2.0 10.0 50.0

| Mass     | Calc. Mass | mDa | PPM | DBE  | i-FIT | Norm | Conf (%) | Formula       |
|----------|------------|-----|-----|------|-------|------|----------|---------------|
| 524.1934 | 524.1934   | 0.0 | 0.0 | 19.5 | 747.4 | n/a  | n/a      | C29 H26 N5 O5 |

# Spectral data of compound 5c

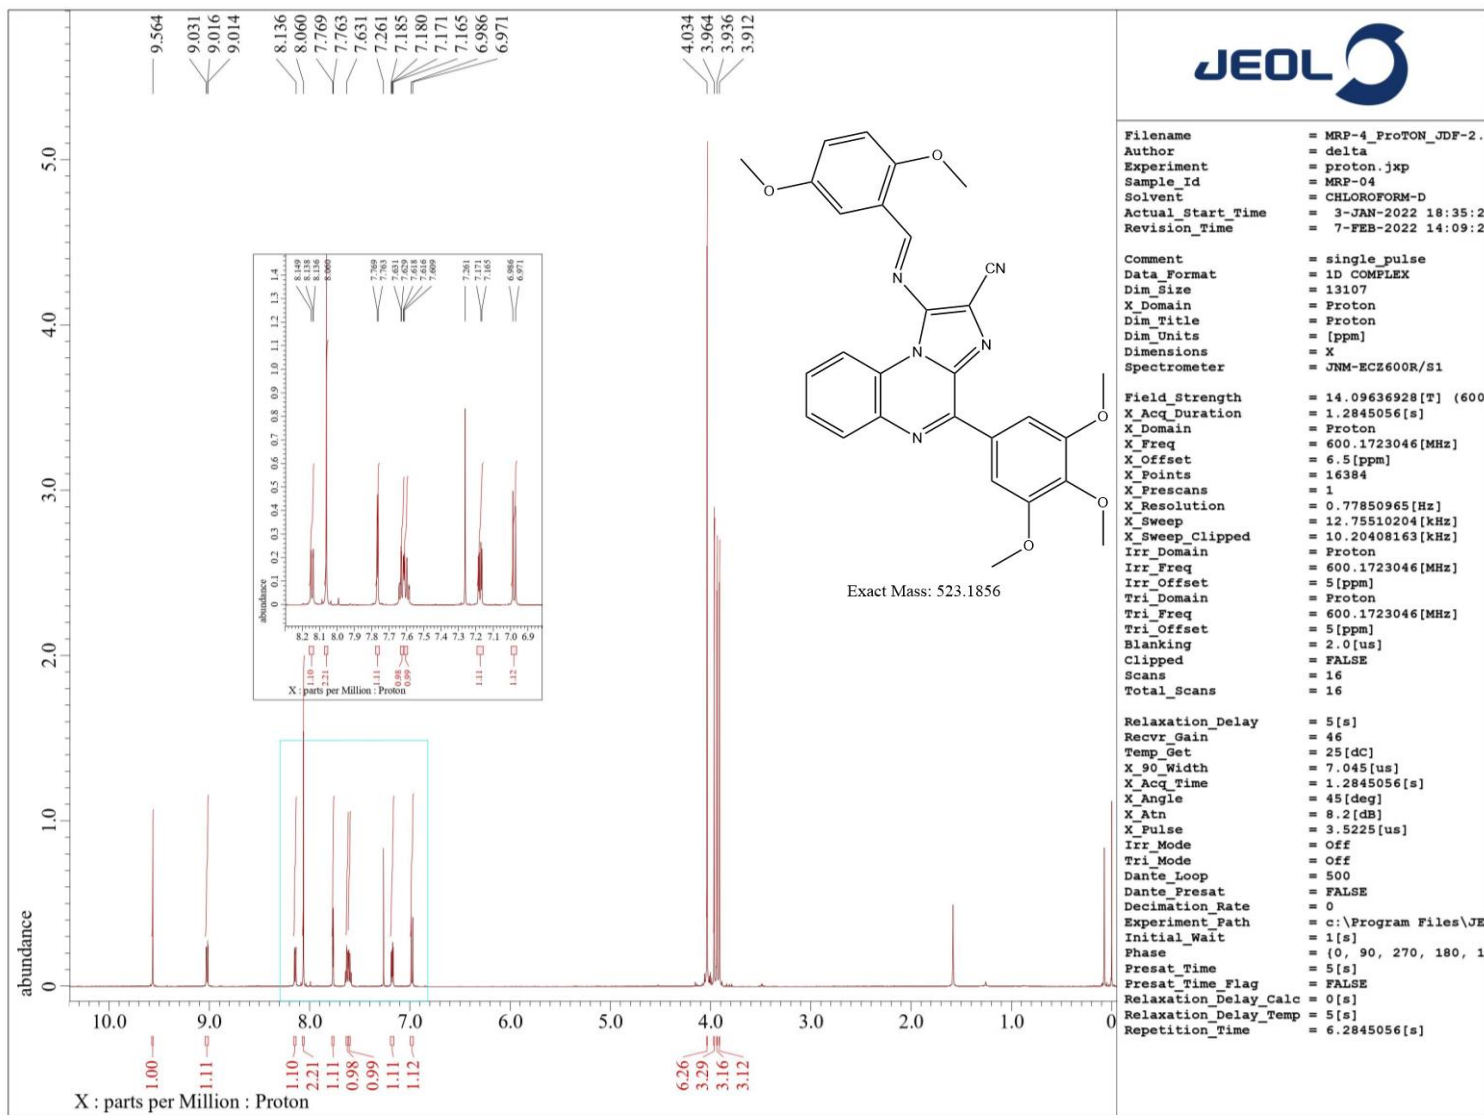

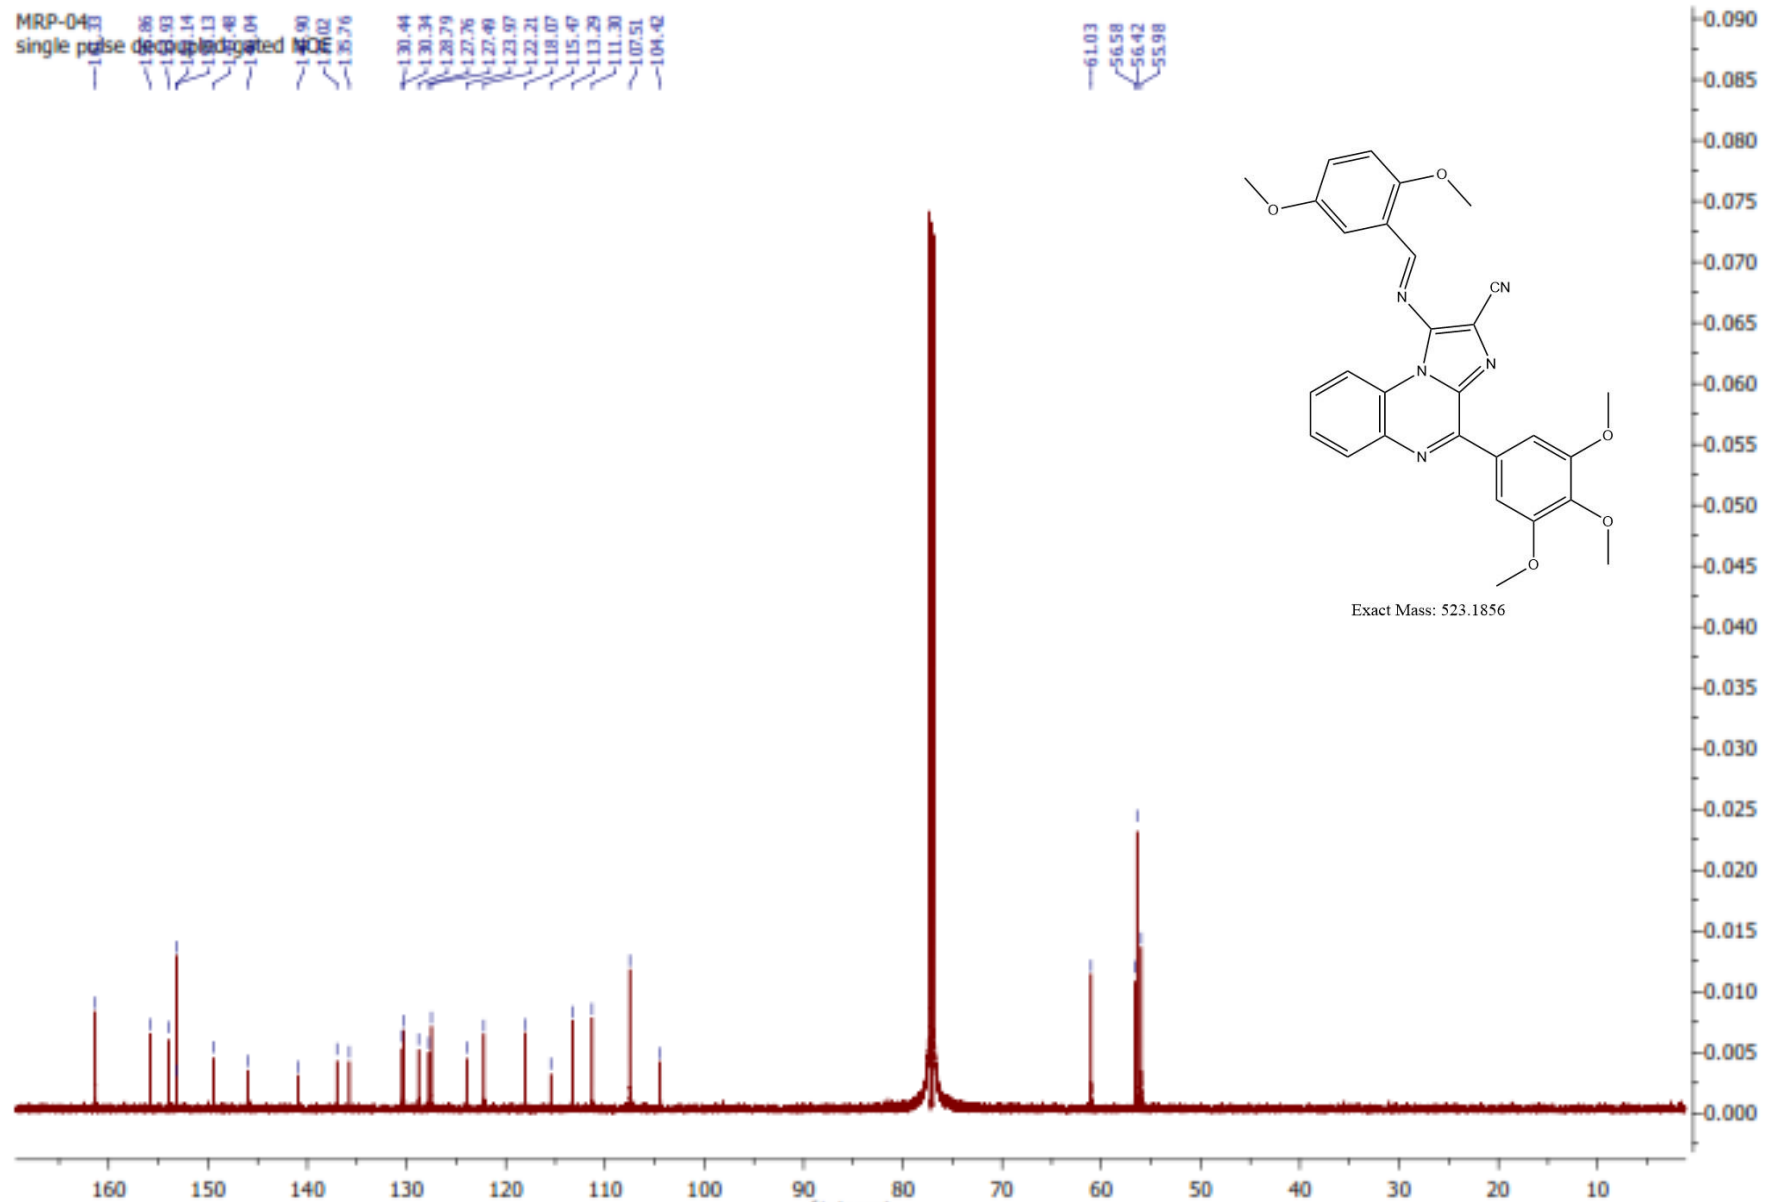

## Elemental Composition Report

### Single Mass Analysis

Tolerance = 10.0 PPM / DBE: min = -1.5, max = 50.0

Element prediction: Off

Number of isotope peaks used for i-FIT = 5

Monoisotopic Mass, Even Electron Ions

1737 formula(e) evaluated with 13 results within limits (up to 1 closest results for each mass)

Elements Used:

C: 0-50 H: 0-100 N: 0-10 O: 0-10 Br: 0-2

Sample Name : MRP\_4

IITRPR

Test Name :

23032022\_MRP\_4 8 (0.186)

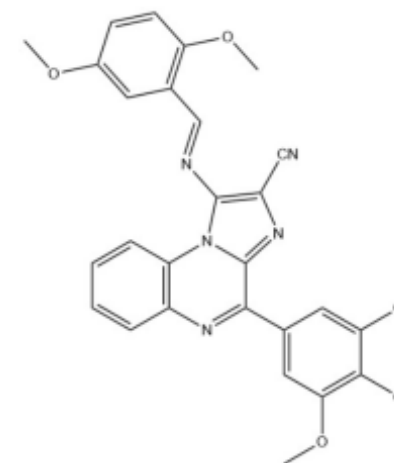

Exact Mass: 523.1856

XEVO G2-XS QTOF

1: TOF MS ES+  
1.41e+007

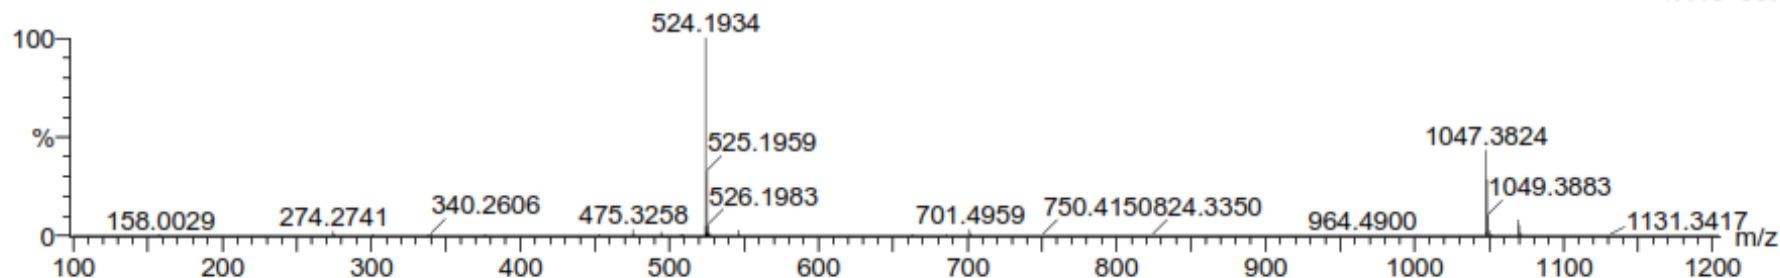

Minimum: -1.5  
Maximum: 2.0 10.0 50.0

| Mass     | Calc. Mass | mDa | PPM | DBE  | i-FIT  | Norm | Conf (%) | Formula       |
|----------|------------|-----|-----|------|--------|------|----------|---------------|
| 524.1934 | 524.1934   | 0.0 | 0.0 | 19.5 | 1205.6 | n/a  | n/a      | C29 H26 N5 O5 |

# Spectral data of compound 5d

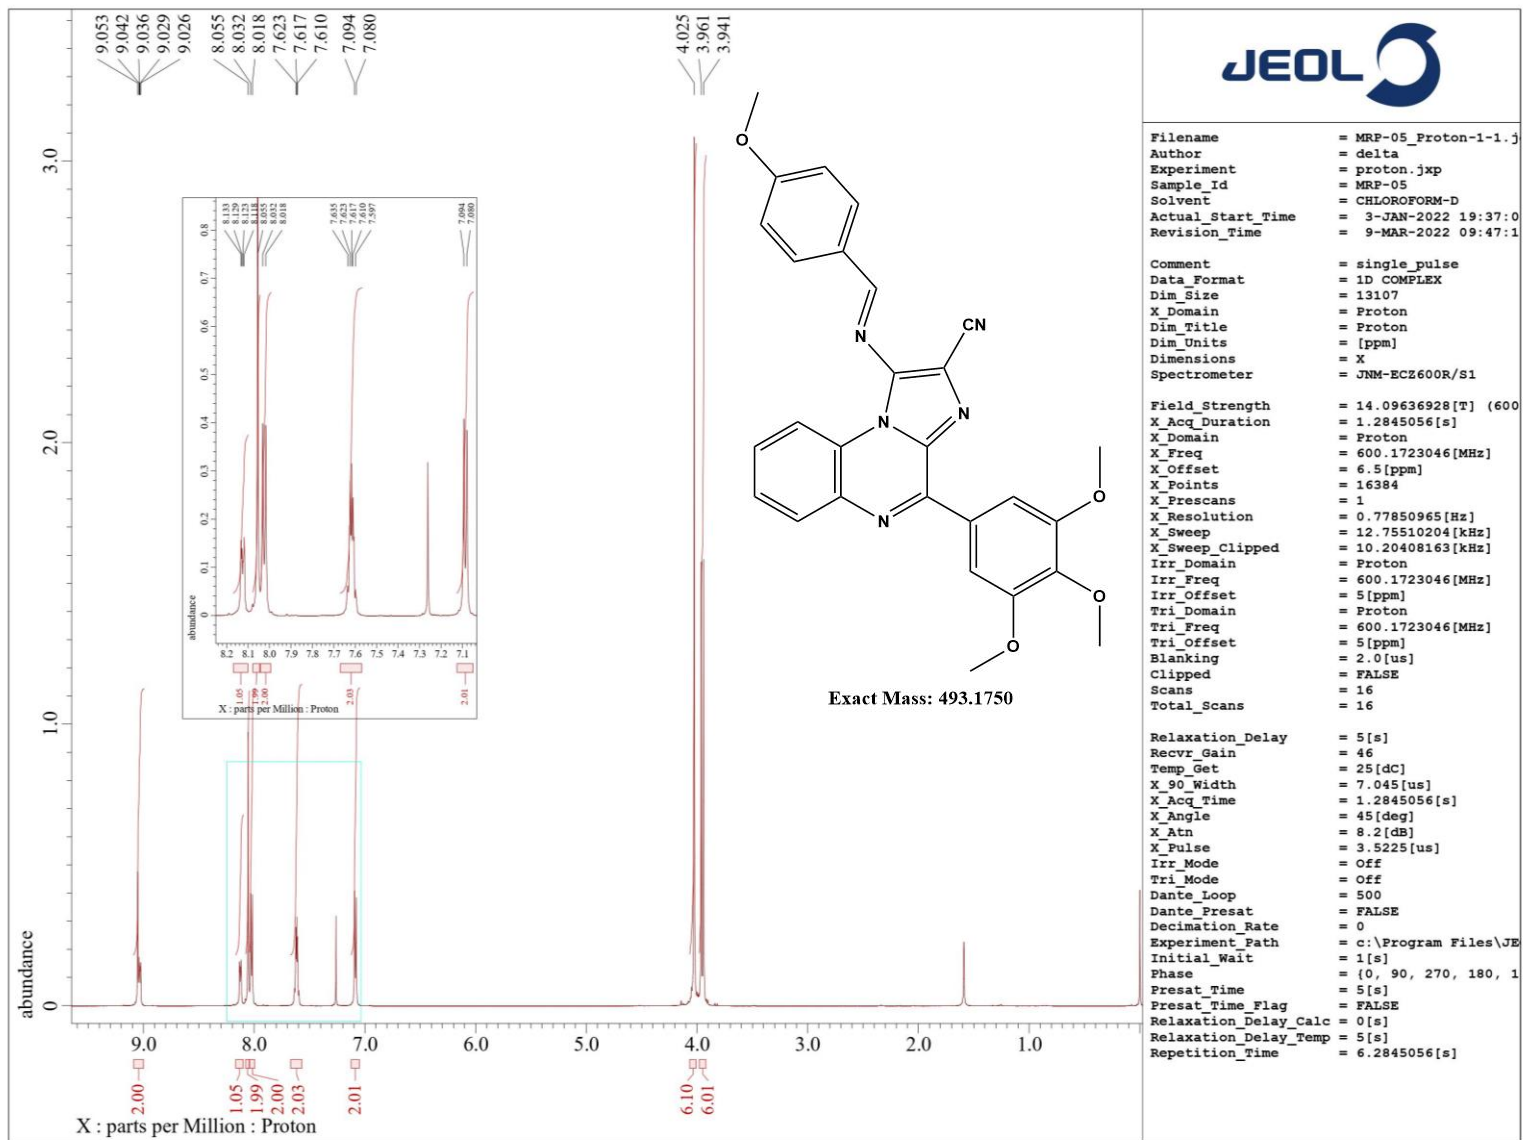

MRP-05  
single pulse decoupled gated NOE

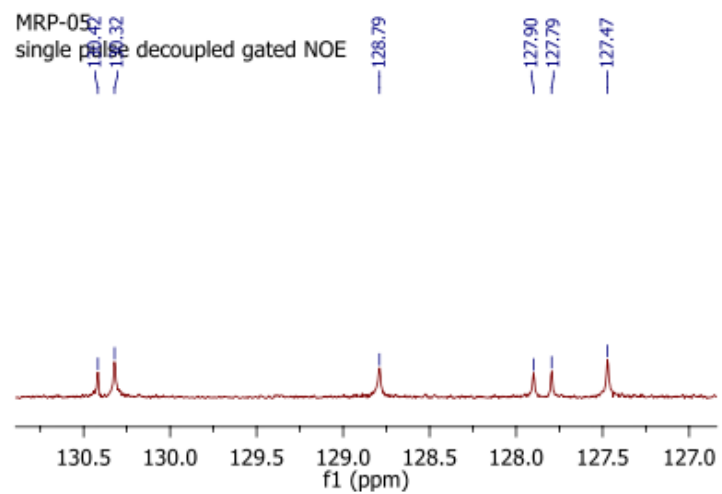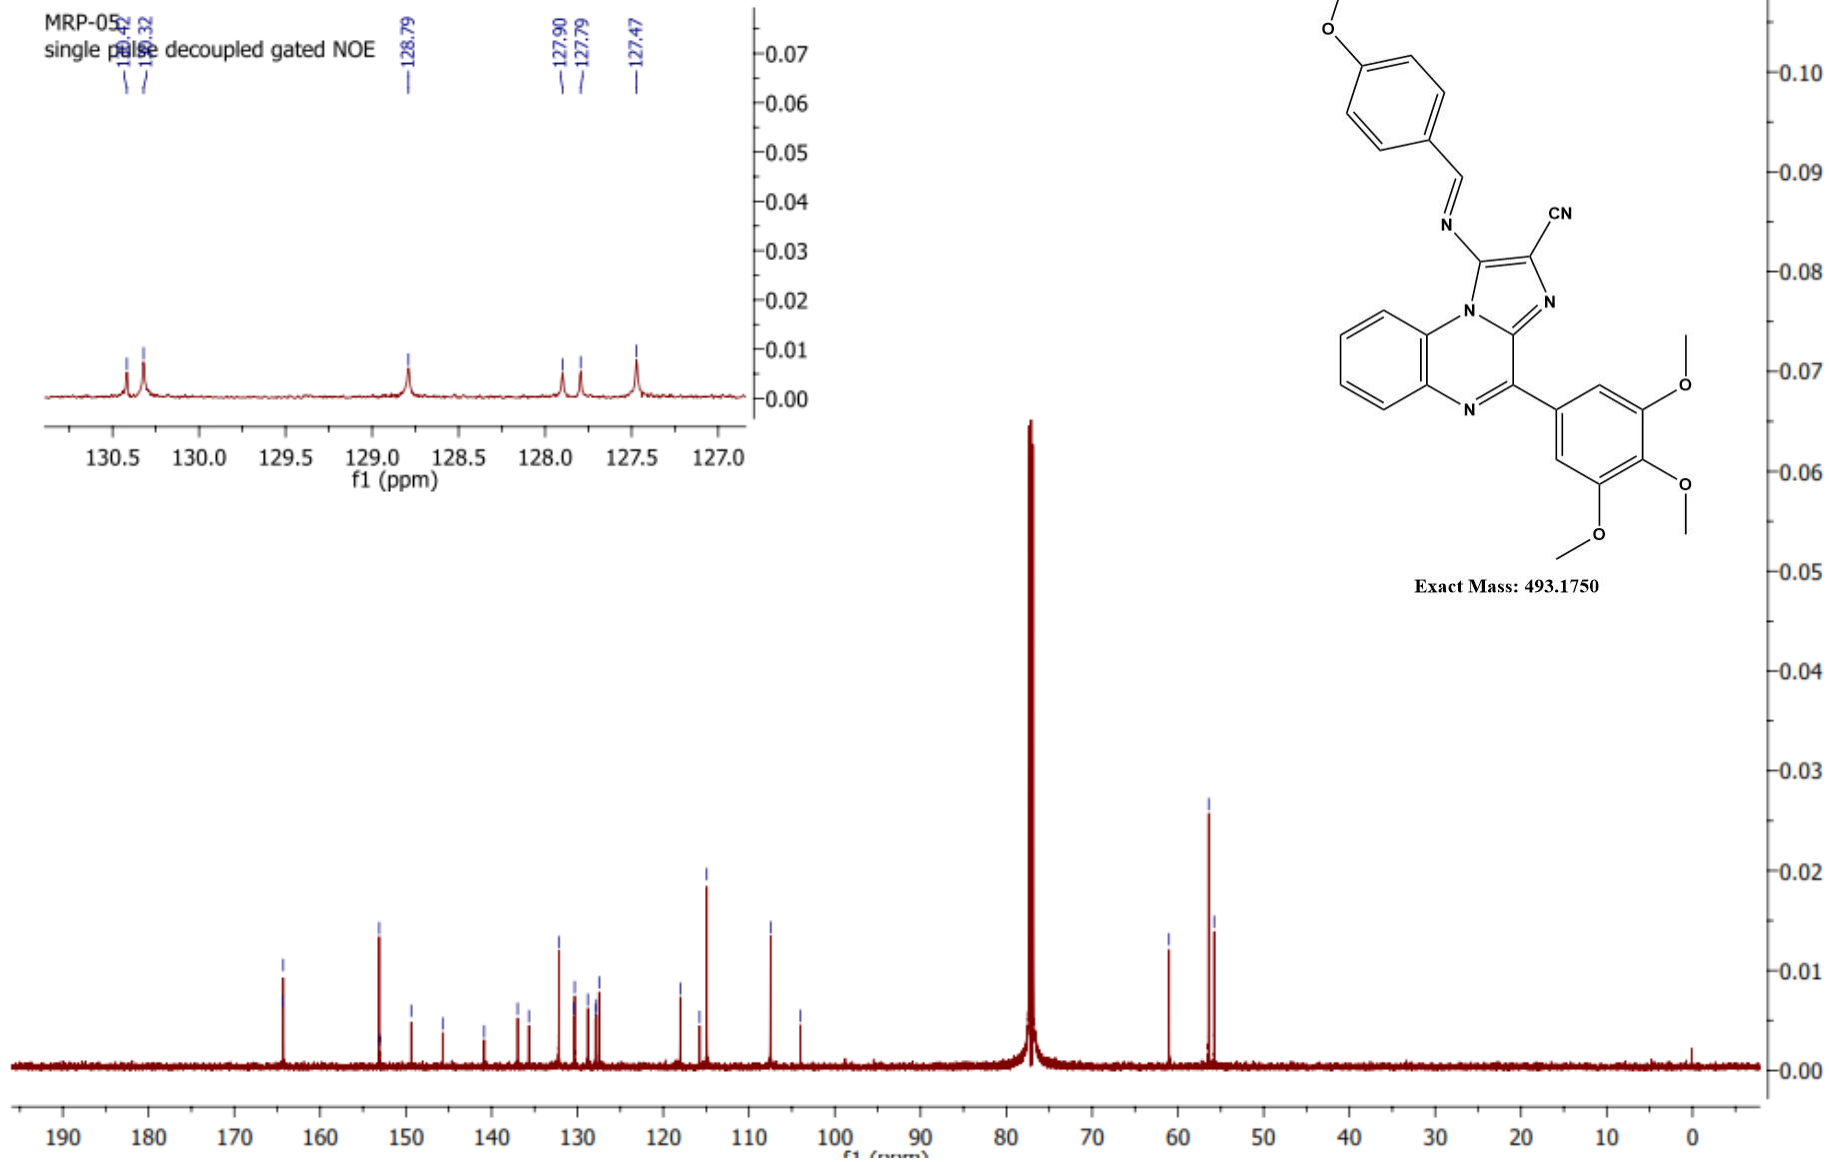



# Elemental Composition Report

## Single Mass Analysis

Tolerance = 10.0 PPM / DBE: min = -1.5, max = 50.0

Element prediction: Off

Number of isotope peaks used for i-FIT = 5

Monoisotopic Mass, Even Electron Ions

1608 formula(e) evaluated with 9 results within limits (up to 1 closest results for each mass)

Elements Used:

C: 0-50 H: 0-100 N: 0-10 O: 0-10 Br: 0-2

Sample Name : MRP\_5

IITRPR

Test Name :

23032022\_MRP\_5 11 (0.249)

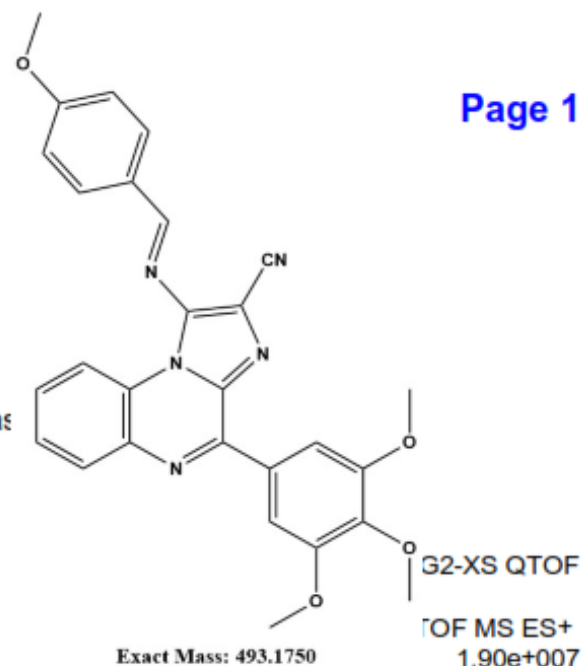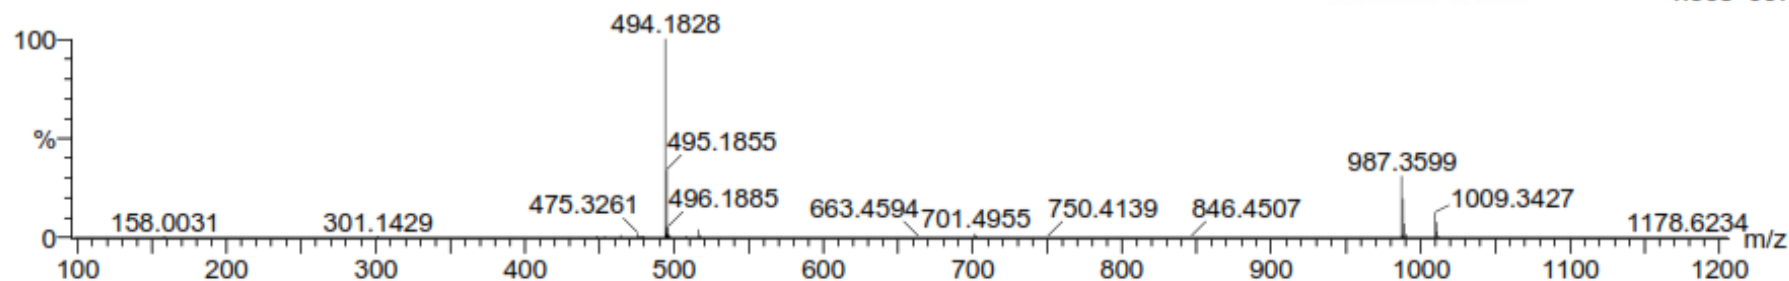

Minimum: -1.5  
 Maximum: 2.0 10.0 50.0

| Mass     | Calc. Mass | mDa | PPM | DBE  | i-FIT  | Norm | Conf (%) | Formula       |
|----------|------------|-----|-----|------|--------|------|----------|---------------|
| 494.1828 | 494.1828   | 0.0 | 0.0 | 19.5 | 1345.7 | n/a  | n/a      | C28 H24 N5 O4 |



# Spectral data of compound 5e

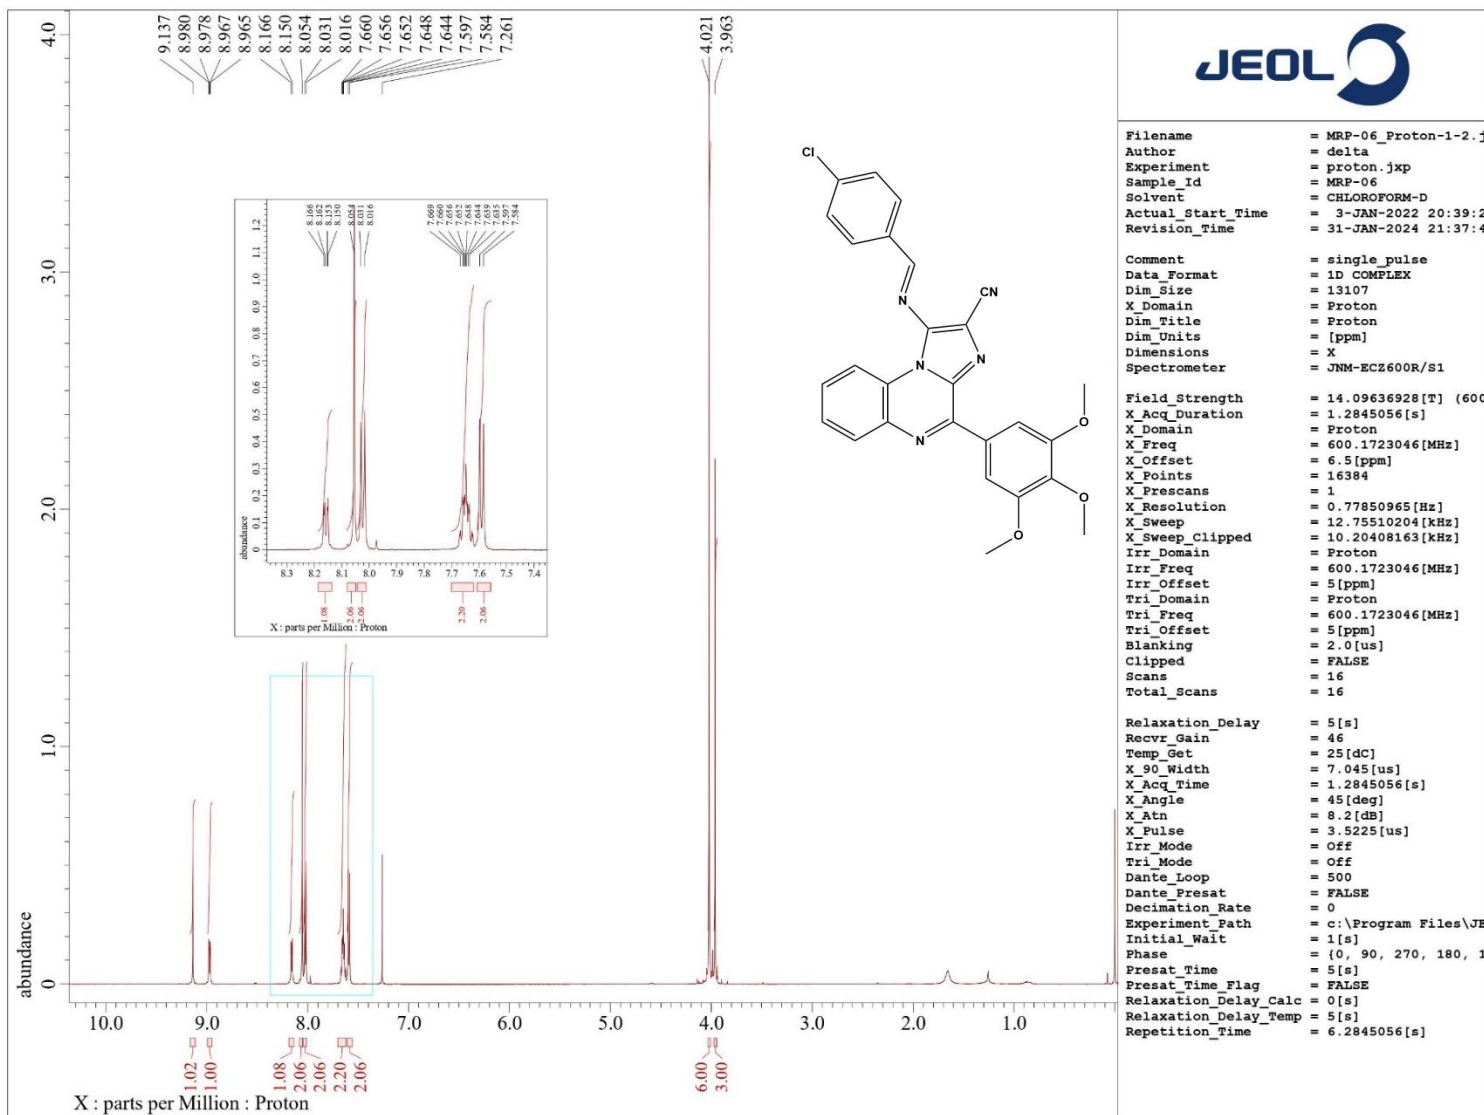

MRP-06  
single pulse decoupled gated NOE

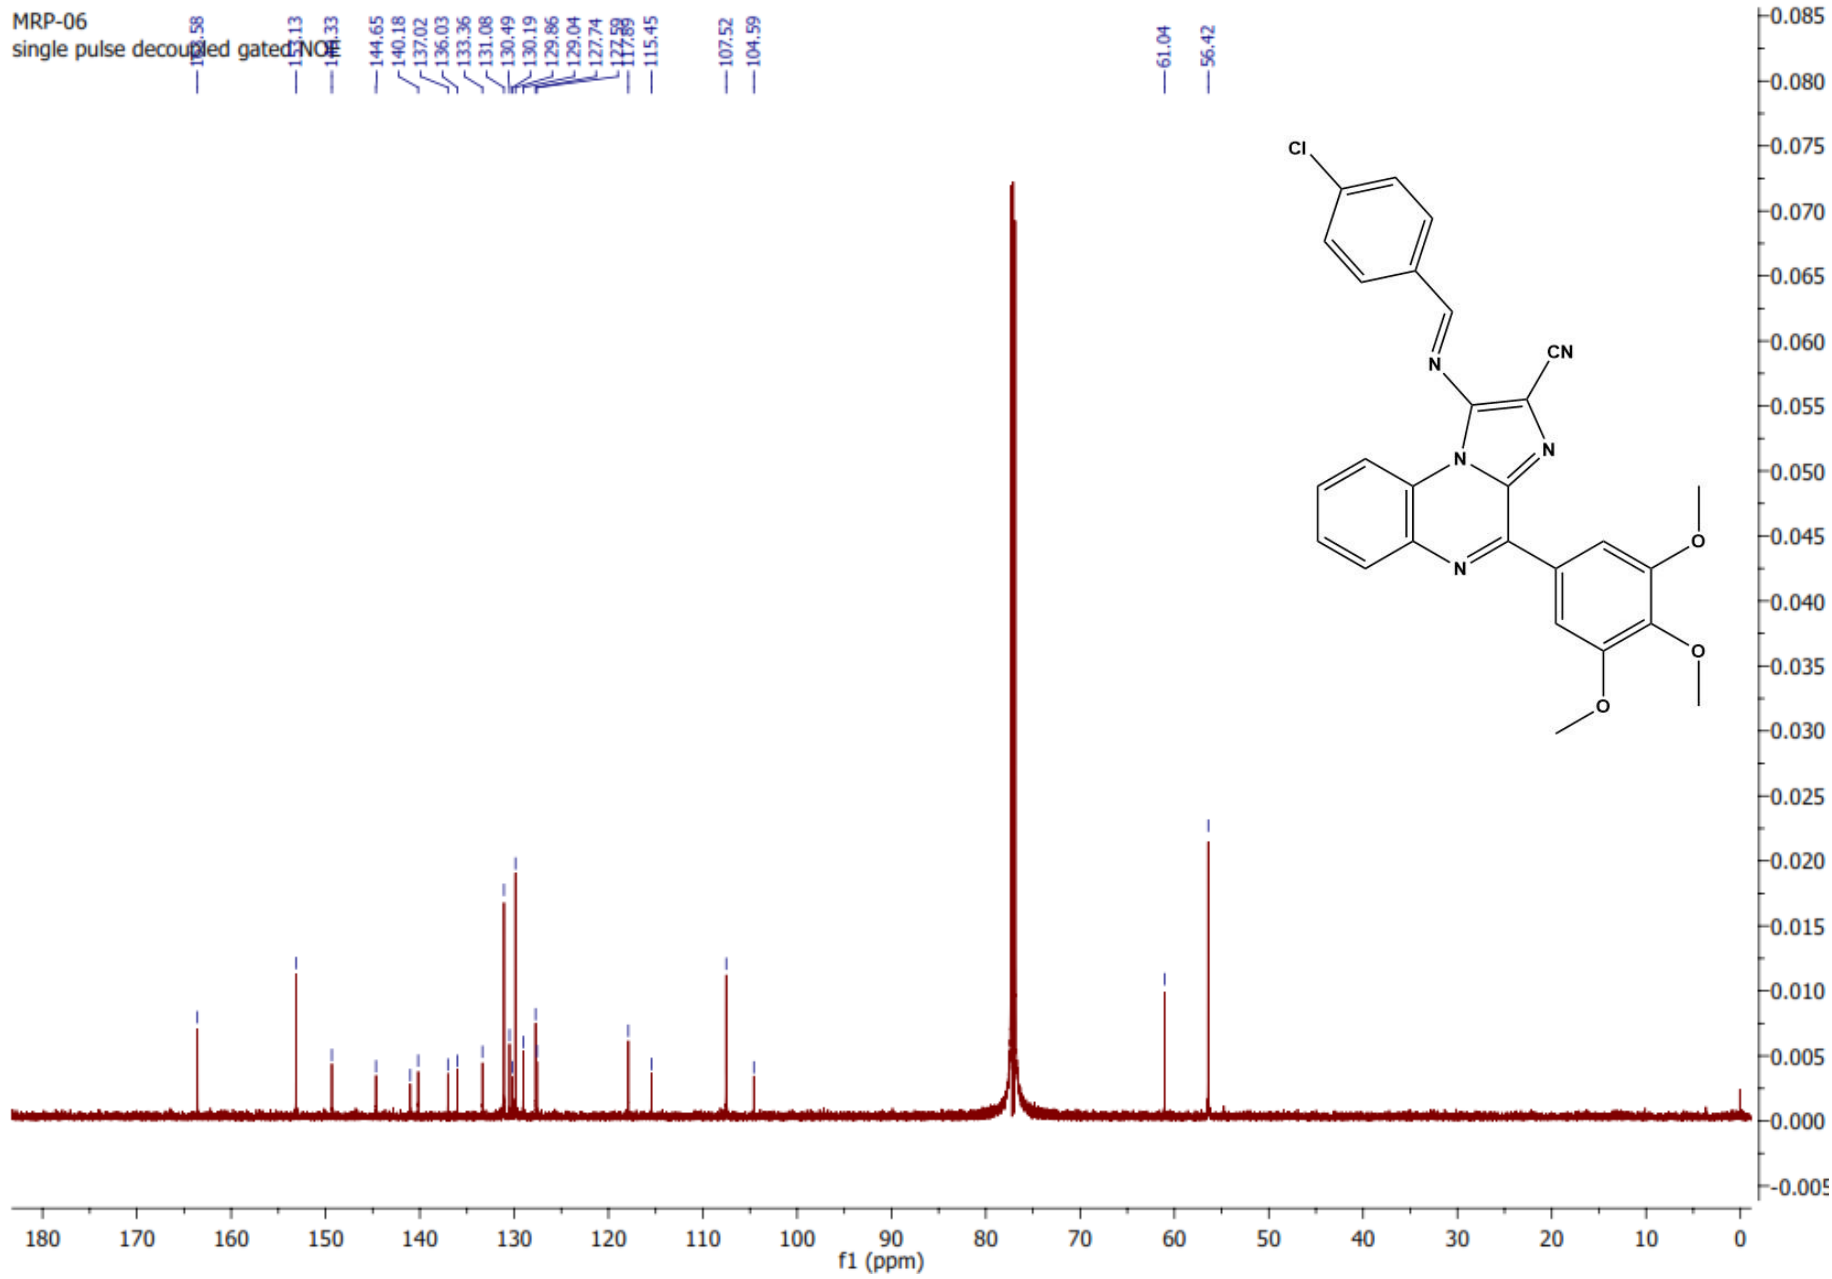

# Elemental Composition Report

## Single Mass Analysis

Tolerance = 10.0 PPM / DBE: min = -1.5, max = 50.0

Element prediction: Off

Number of isotope peaks used for i-FIT = 5

Monoisotopic Mass, Even Electron Ions

1822 formula(e) evaluated with 17 results within limits (up to 1 closest results for each mass)

Elements Used:

C: 0-50 H: 0-100 N: 0-10 O: 0-10 Cl: 0-2

Sample Name : MRP\_6

Test Name :

23032022\_MRP\_6 8 (0.186)

IITRPR

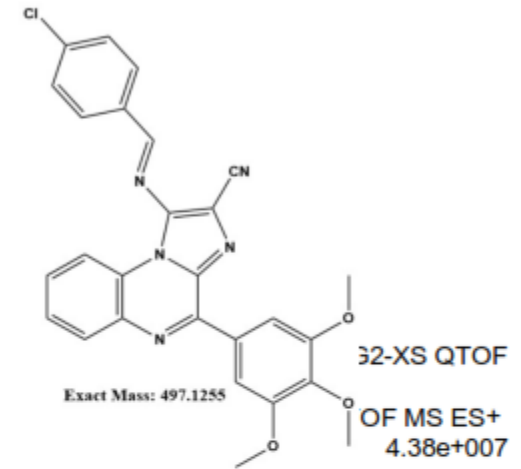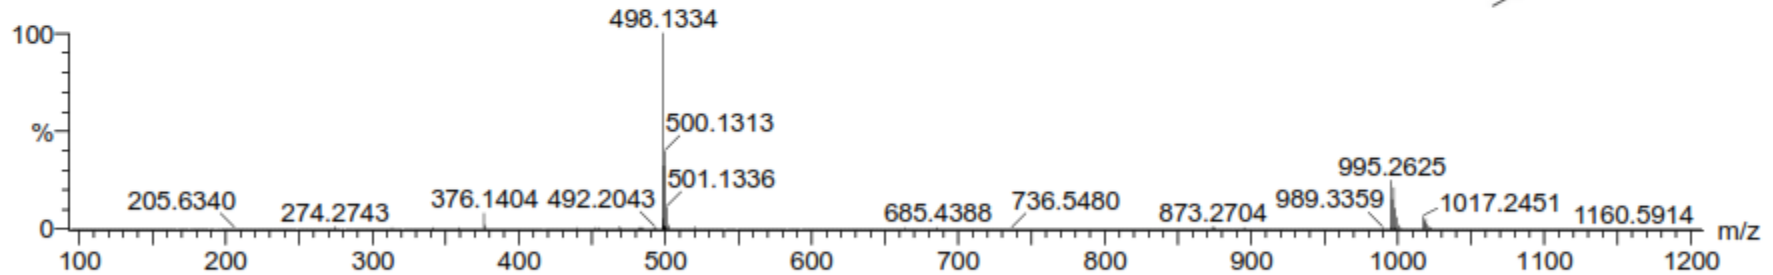

Minimum: -1.5  
Maximum: 2.0 10.0 50.0

| Mass     | Calc. Mass | mDa | PPM | DBE  | i-FIT  | Norm | Conf (%) | Formula          |
|----------|------------|-----|-----|------|--------|------|----------|------------------|
| 498.1334 | 498.1333   | 0.1 | 0.2 | 19.5 | 1373.8 | n/a  | n/a      | C27 H21 N5 O3 Cl |

# Spectral data of compound 5f

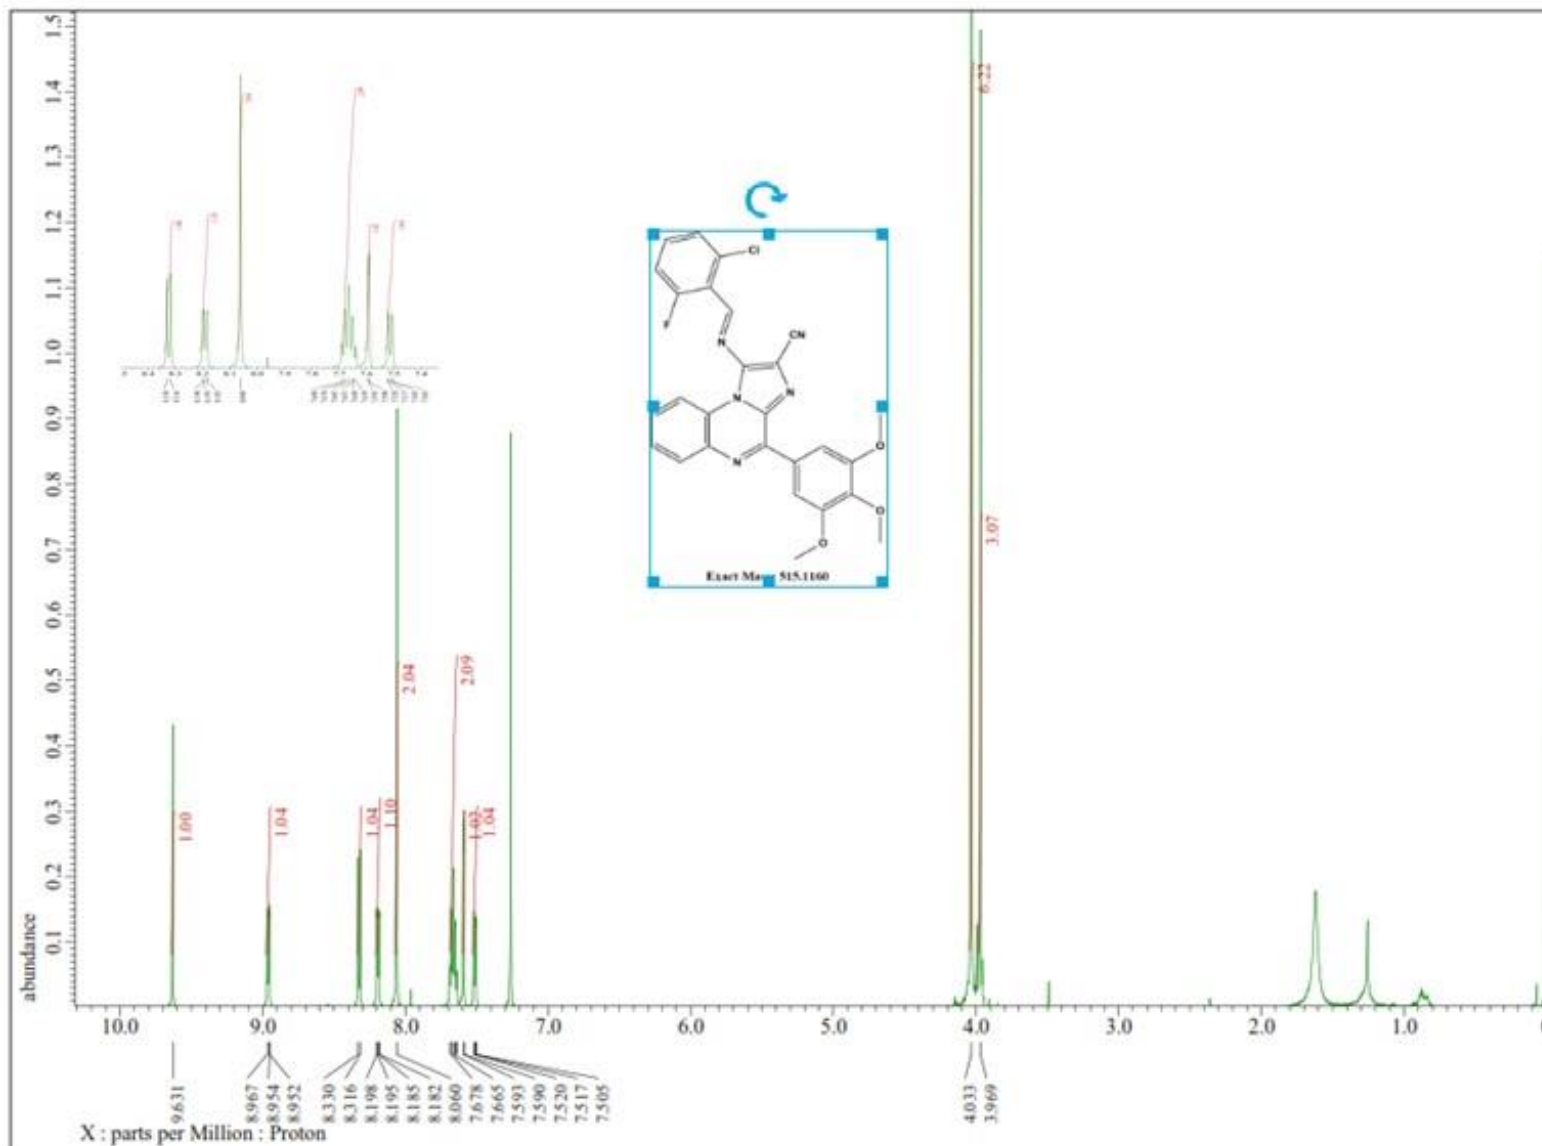

MRP-07  
single pulse decoupled

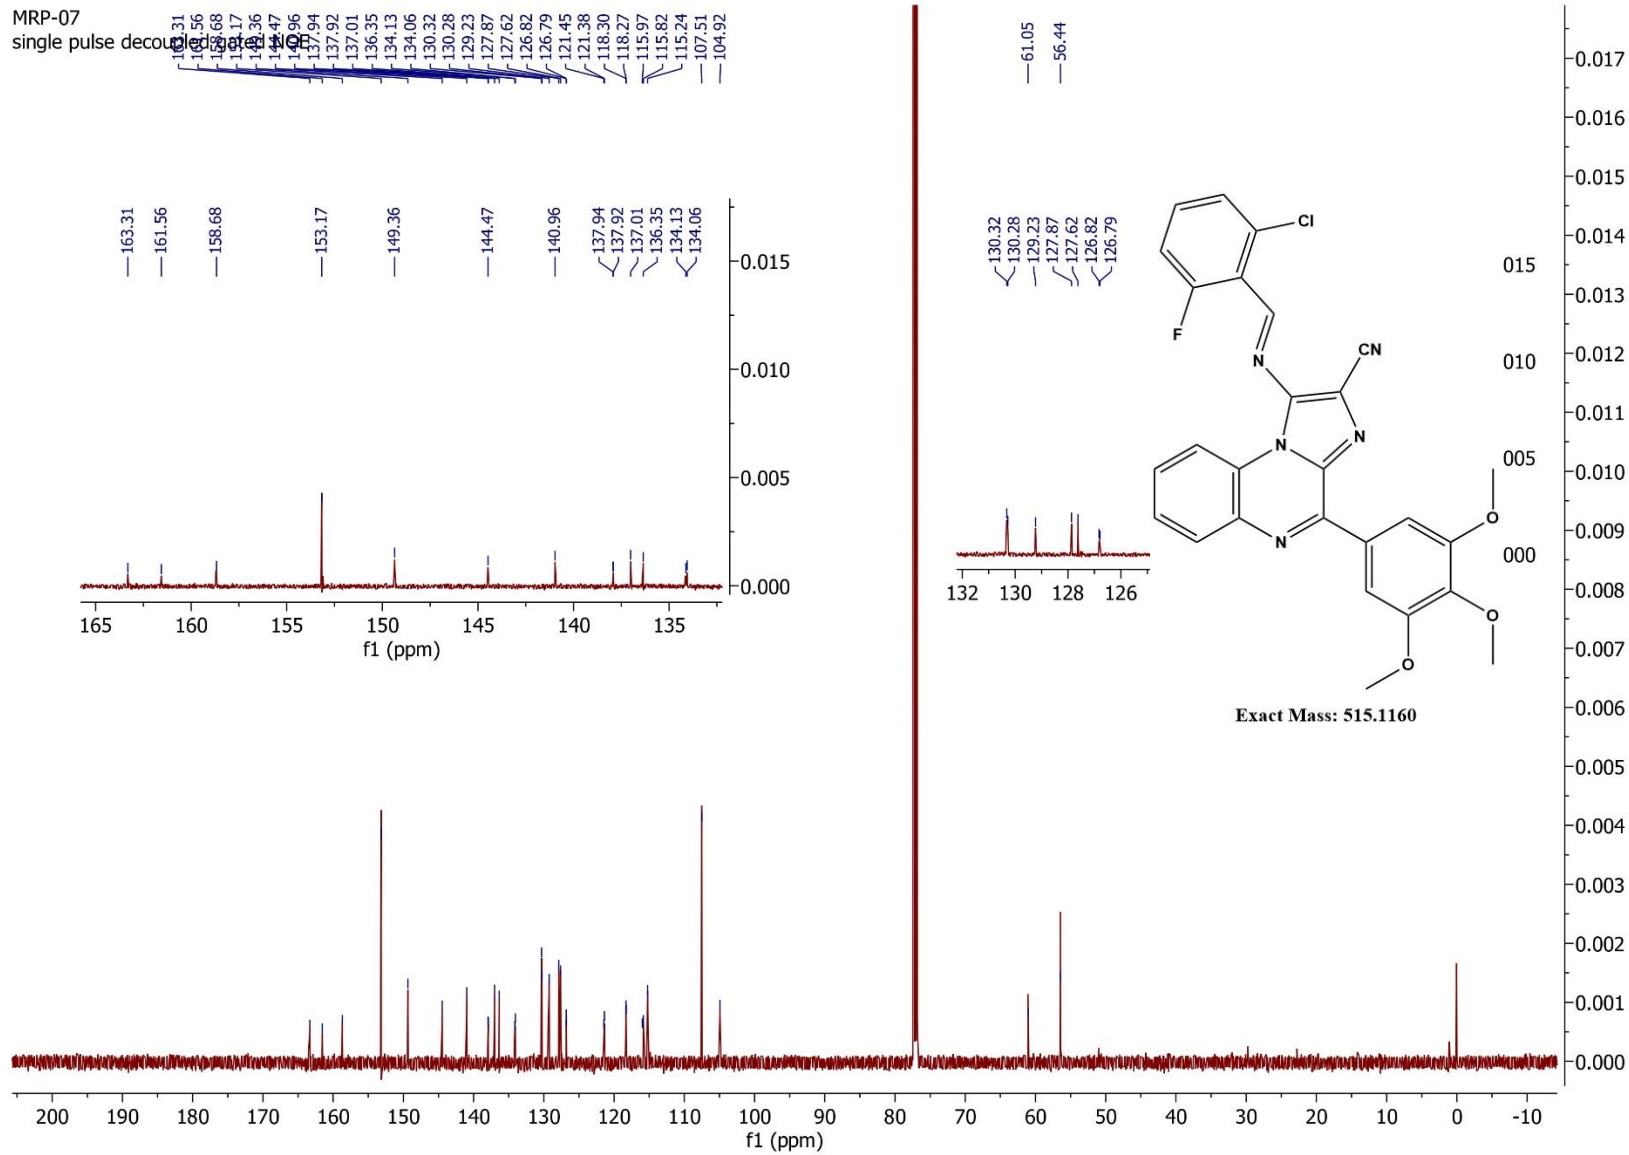

<sup>19</sup>F NMR

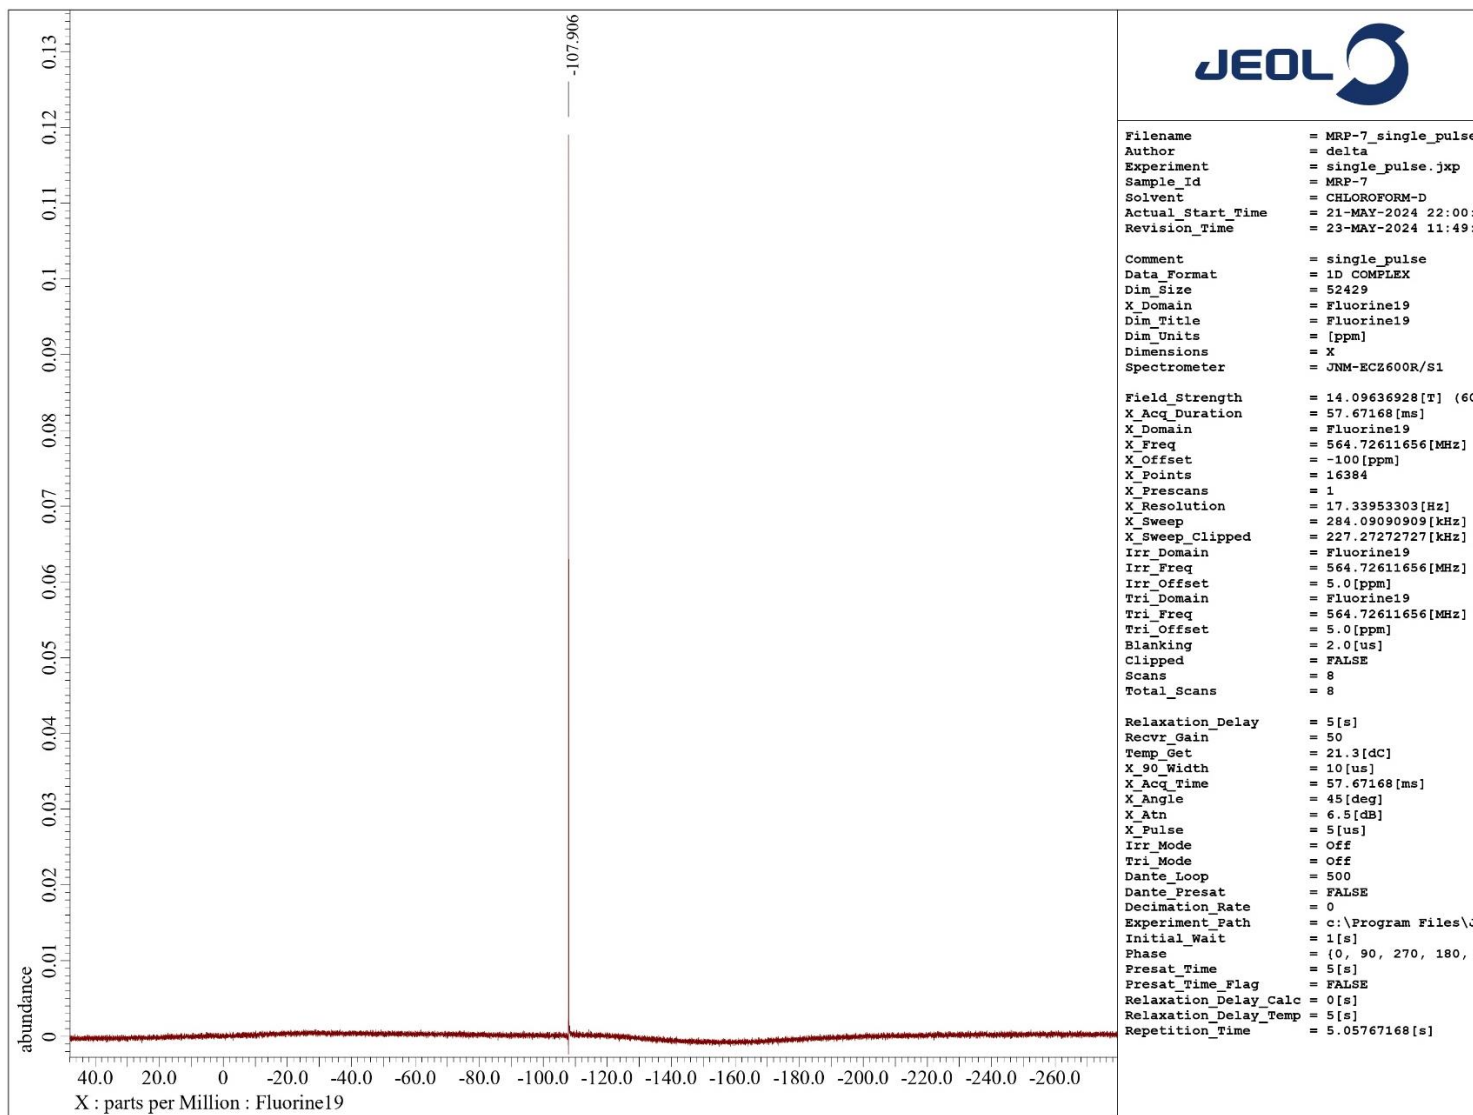

## Elemental Composition Report

### Single Mass Analysis

Tolerance = 10.0 PPM / DBE: min = -1.5, max = 50.0

Element prediction: Off

Number of isotope peaks used for i-FIT = 5

Monoisotopic Mass, Even Electron Ions

4359 formula(e) evaluated with 54 results within limits (up to 1 closest results for each mass)

Elements Used:

C: 0-50 H: 0-100 N: 5-10 O: 0-10 Cl: 0-2 F: 0-4

Sample Name : MRP\_7

IITRPR

Test Name :

23032022\_MRP\_7 9 (0.203)

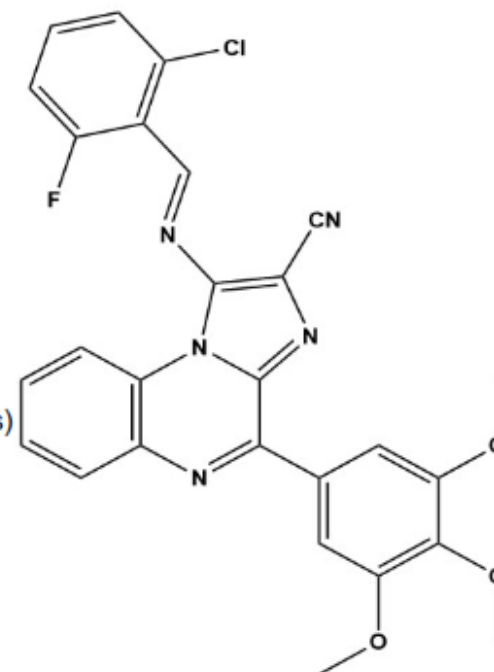

Exact Mass: 515.1160

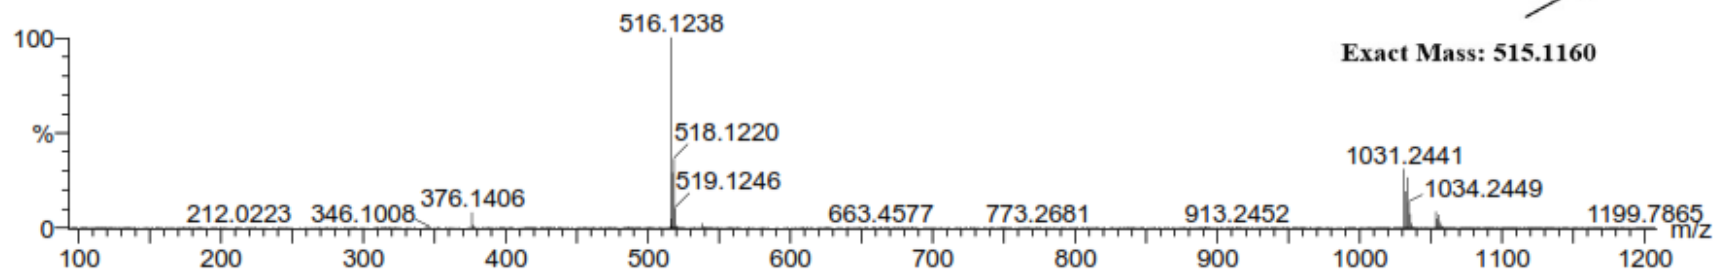

Minimum: -1.5  
Maximum: 2.0 10.0 50.0

| Mass     | Calc. Mass | mDa  | PPM  | DBE  | i-FIT | Norm | Conf (%) | Formula            |
|----------|------------|------|------|------|-------|------|----------|--------------------|
| 516.1238 | 516.1239   | -0.1 | -0.2 | 19.5 | 602.6 | n/a  | n/a      | C27 H20 N5 O3 Cl F |



# Spectral data of compound 5g

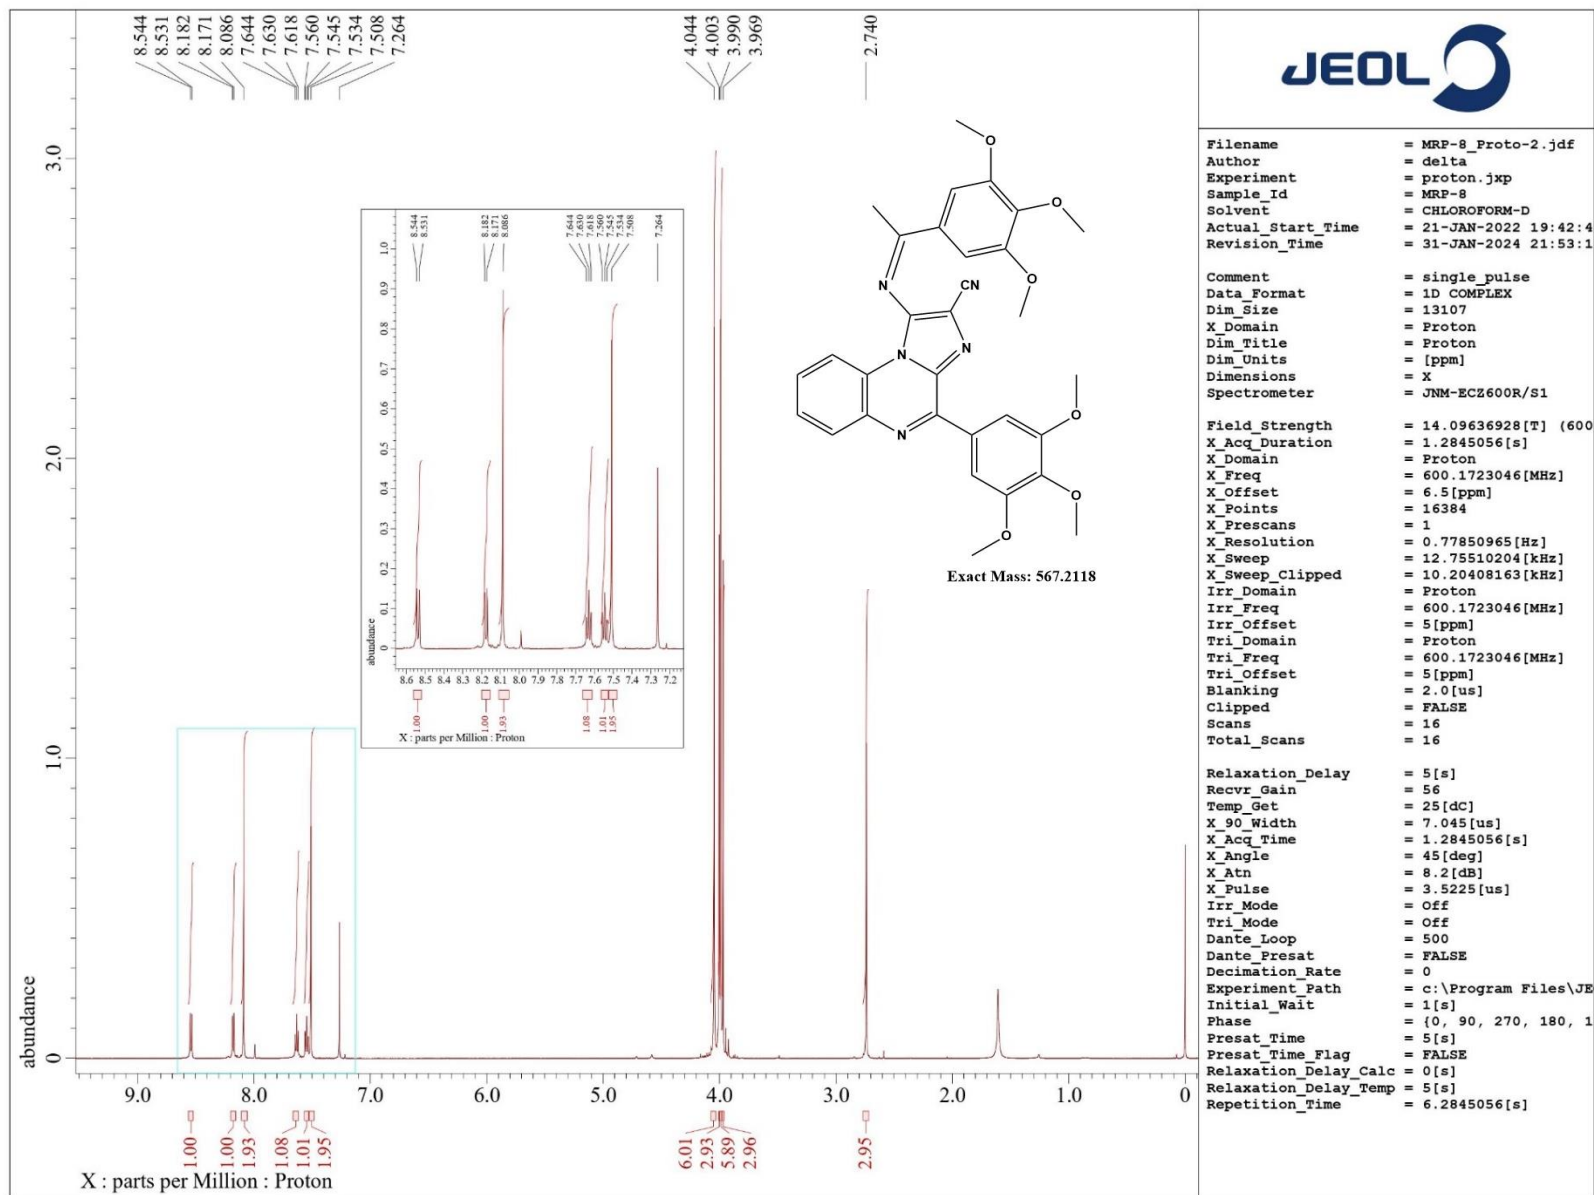





# Elemental Composition Report

## Single Mass Analysis

Tolerance = 10.0 PPM / DBE: min = -1.5, max = 50.0

Element prediction: Off

Number of isotope peaks used for i-FIT = 5

Monoisotopic Mass, Even Electron Ions

1111 formula(e) evaluated with 12 results within limits (up to 1 closest results for

Elements Used:

C: 0-50 H: 0-100 N: 5-10 O: 0-10 Cl: 0-2

Sample Name : MRP\_8

Test Name :

23032022\_MRP\_8 9 (0.203)

IITRPR

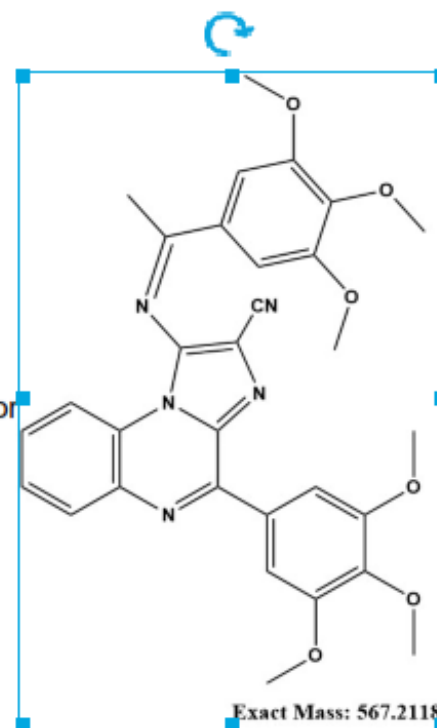

XEVO G2-XS QTOF

1: TOF MS ES+  
4.67e+007

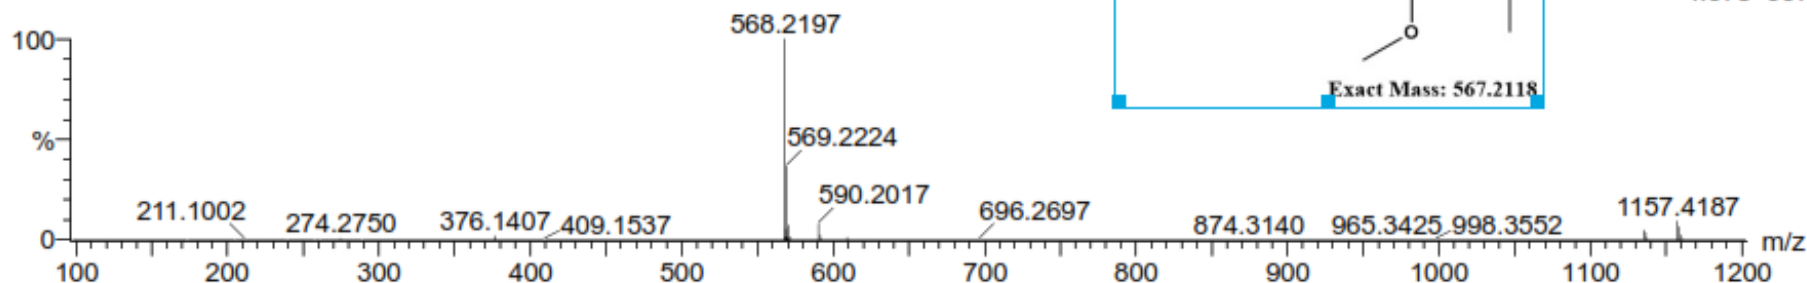

Minimum: -1.5  
Maximum: 2.0 10.0 50.0

| Mass     | Calc. Mass | mDa | PPM | DBE  | i-FIT  | Norm | Conf (%) | Formula       |
|----------|------------|-----|-----|------|--------|------|----------|---------------|
| 568.2197 | 568.2196   | 0.1 | 0.2 | 19.5 | 1270.6 | n/a  | n/a      | C31 H30 N5 O6 |

# Spectral data of compound 5h

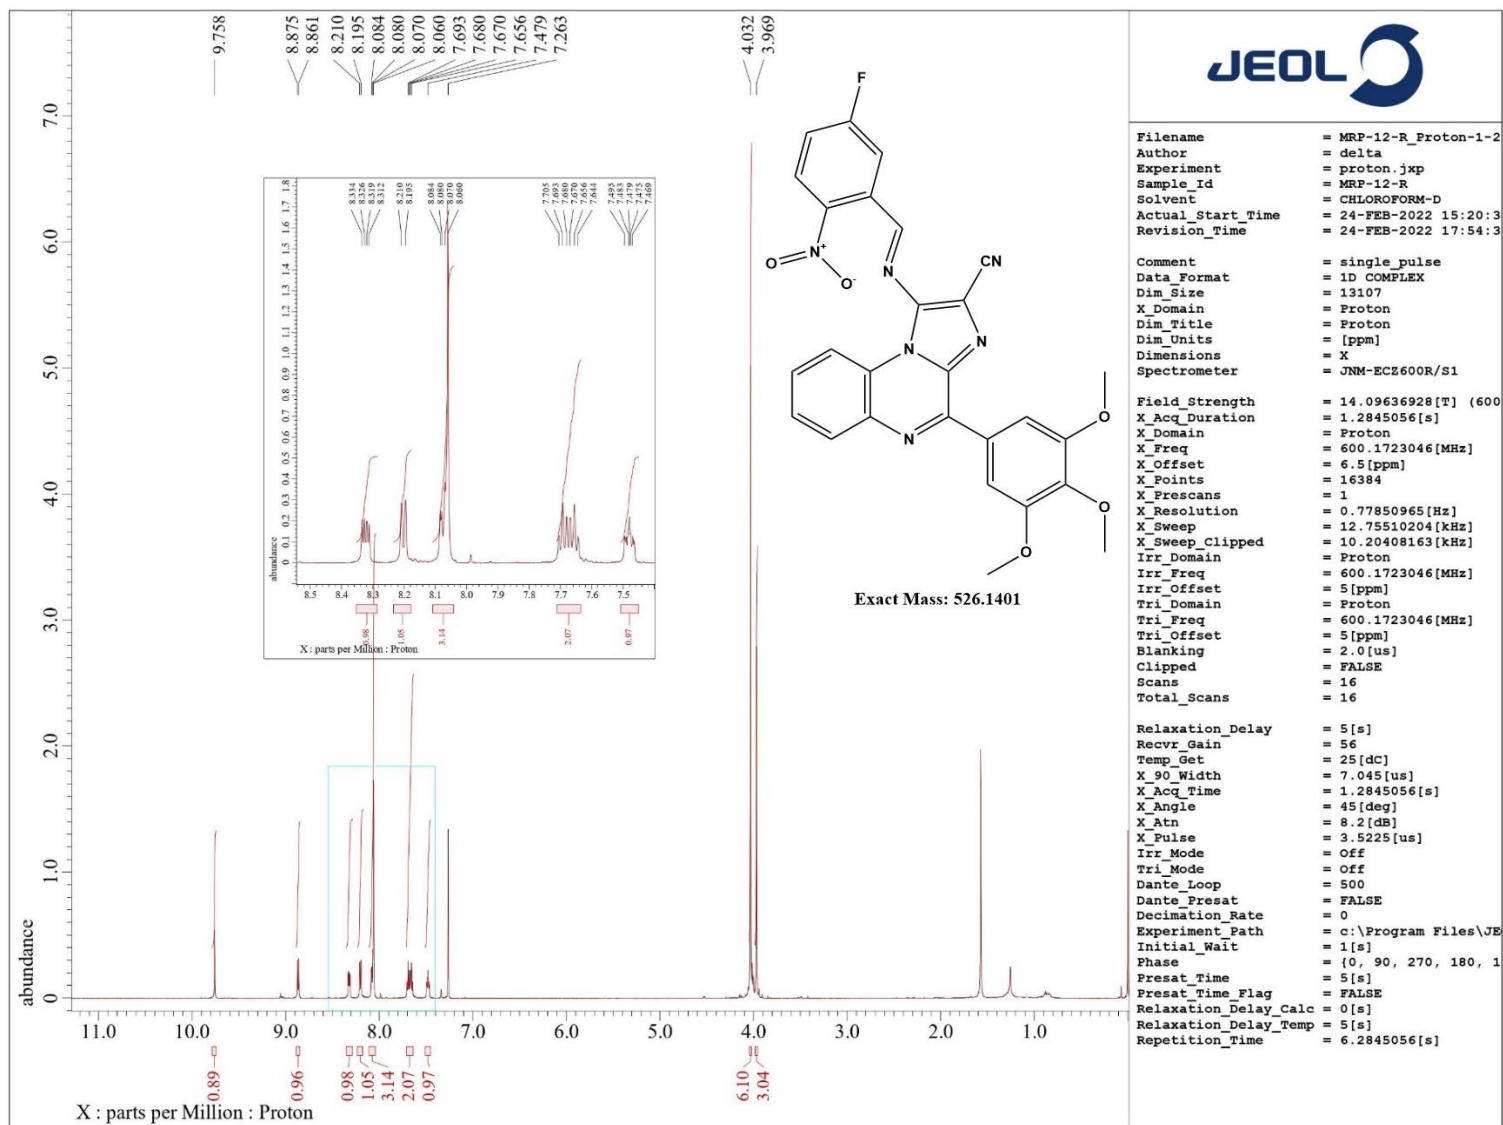

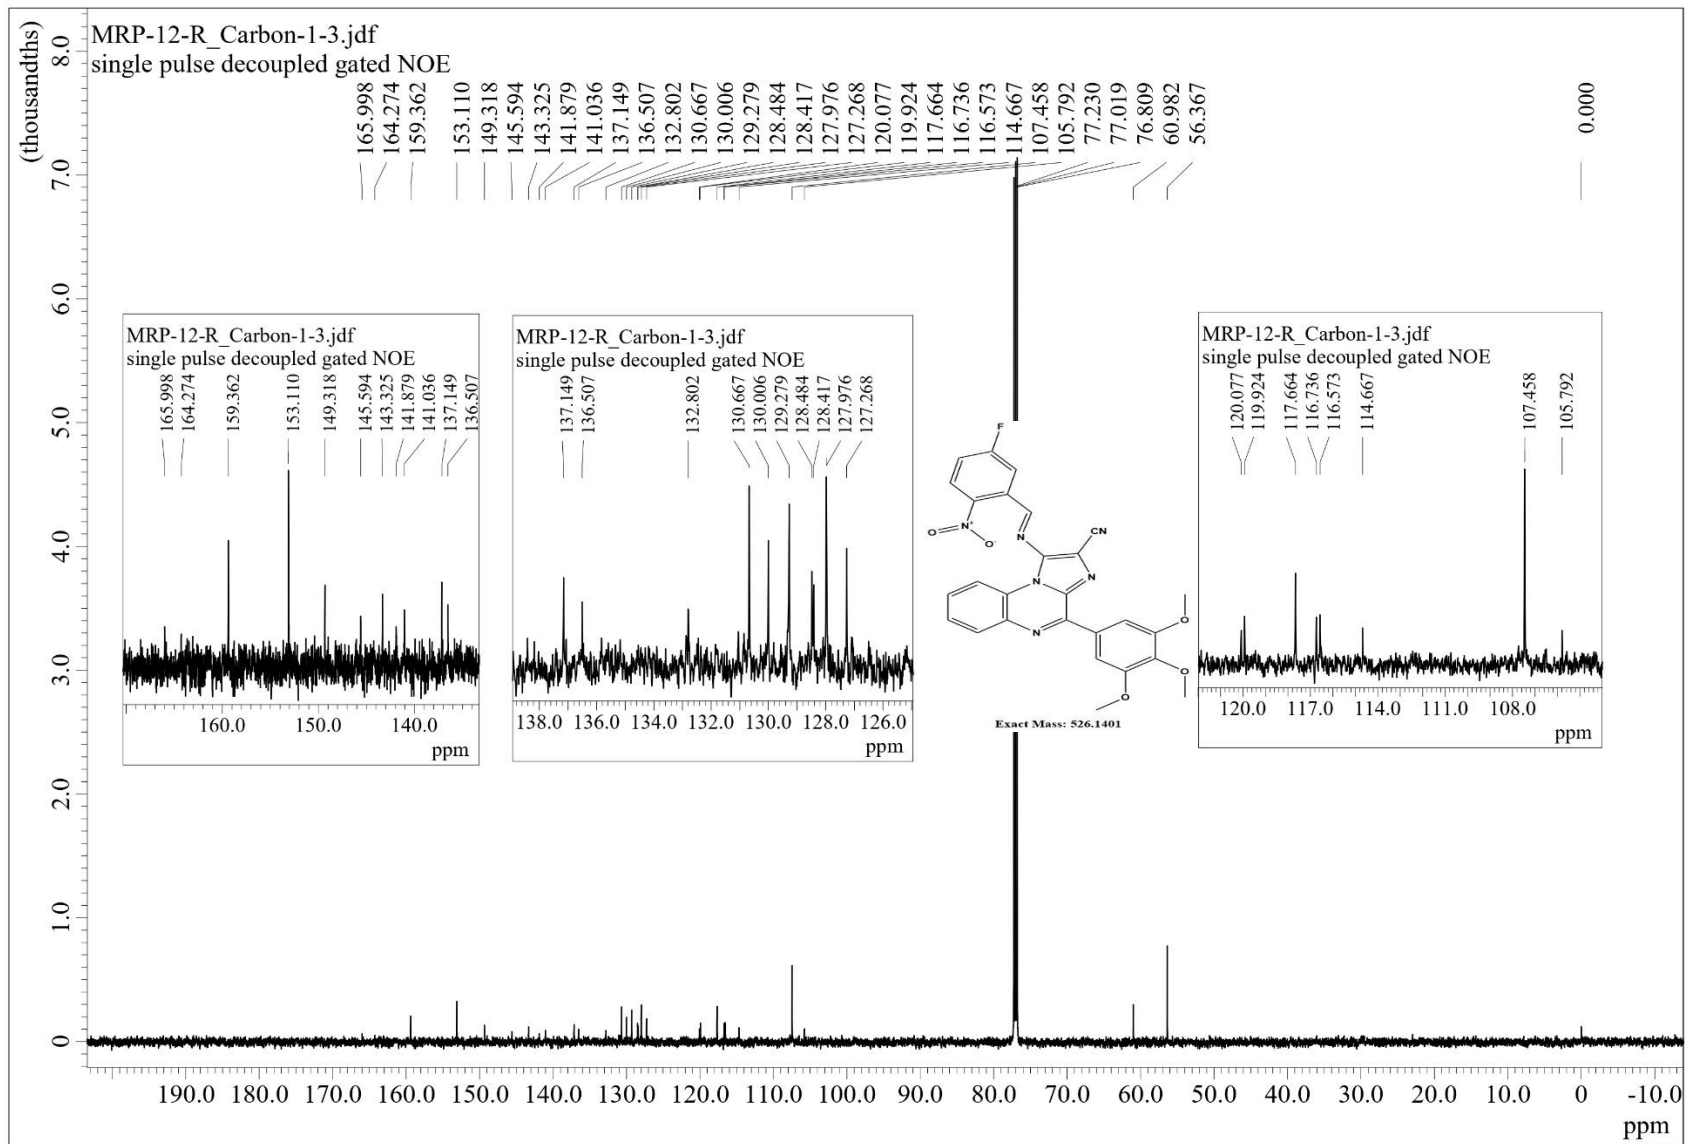

# Elemental Composition Report

## Single Mass Analysis

Tolerance = 10.0 PPM / DBE: min = -1.5, max = 50.0

Element prediction: Off

Number of isotope peaks used for i-FIT = 5

Monoisotopic Mass, Even Electron Ions

4495 formula(e) evaluated with 55 results within limits (up to 1 closest results for Elements Used:

C: 0-50 H: 0-100 N: 5-10 O: 0-10 Cl: 0-2 F: 0-4

Sample Name : MRP\_12R  
Test Name :  
23032022\_MRP\_12R 10 (0.232)

IITRPR

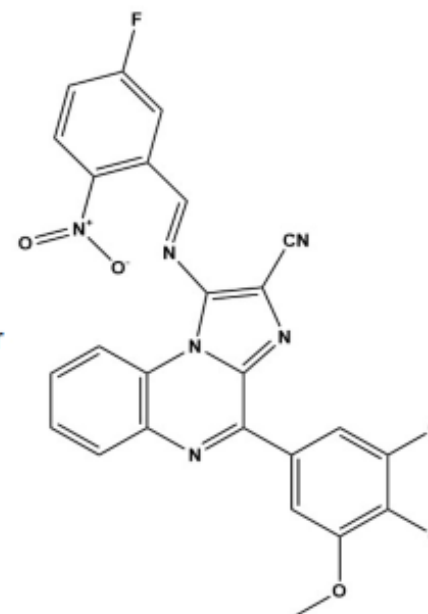

XEVO G2-XS QTOF

1: TOF MS ES+  
6.21e+006

Exact Mass: 526.1401

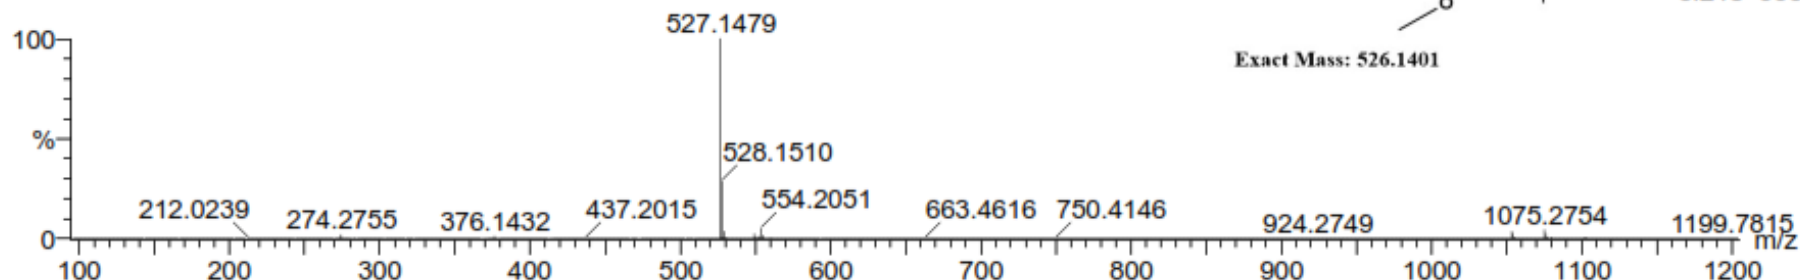

Minimum: -1.5  
Maximum: 2.0 10.0 50.0

| Mass     | Calc. Mass | mDa | PPM | DBE  | i-FIT | Norm | Conf (%) | Formula         |
|----------|------------|-----|-----|------|-------|------|----------|-----------------|
| 527.1479 | 527.1479   | 0.0 | 0.0 | 20.5 | 649.1 | n/a  | n/a      | C27 H20 N6 O5 F |

# Spectral data of compound 5i

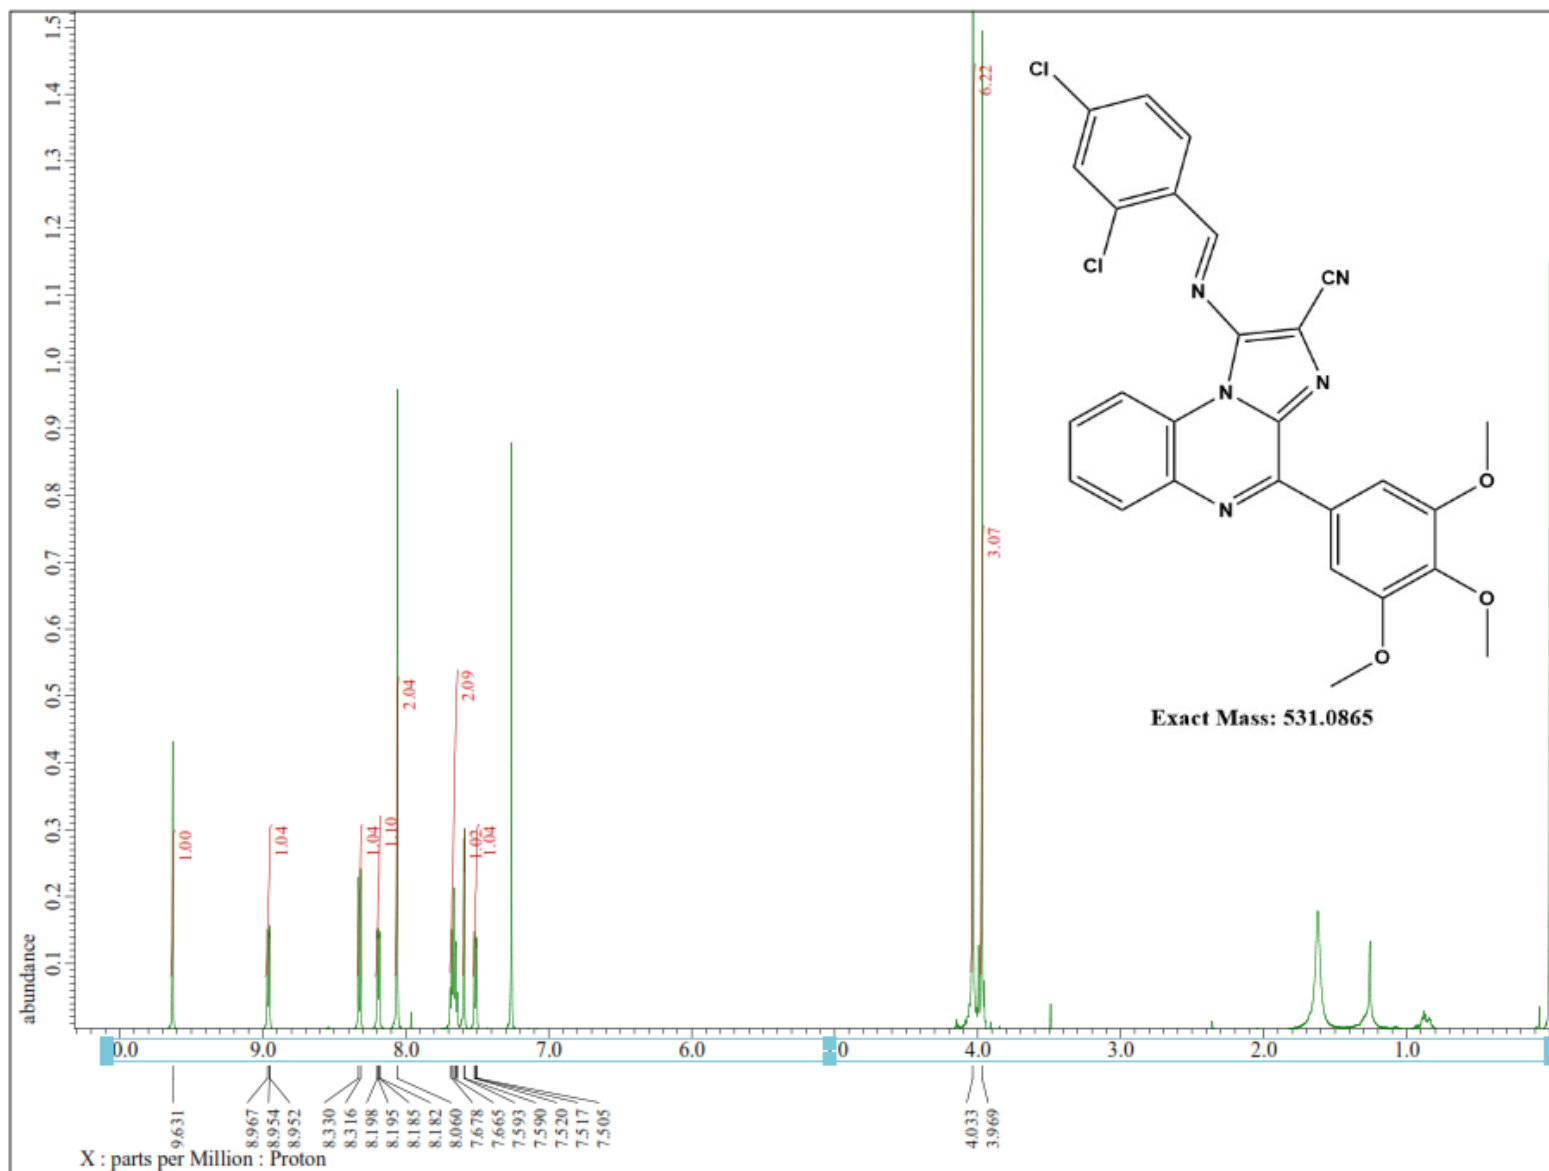

MRP-14  
single pulse

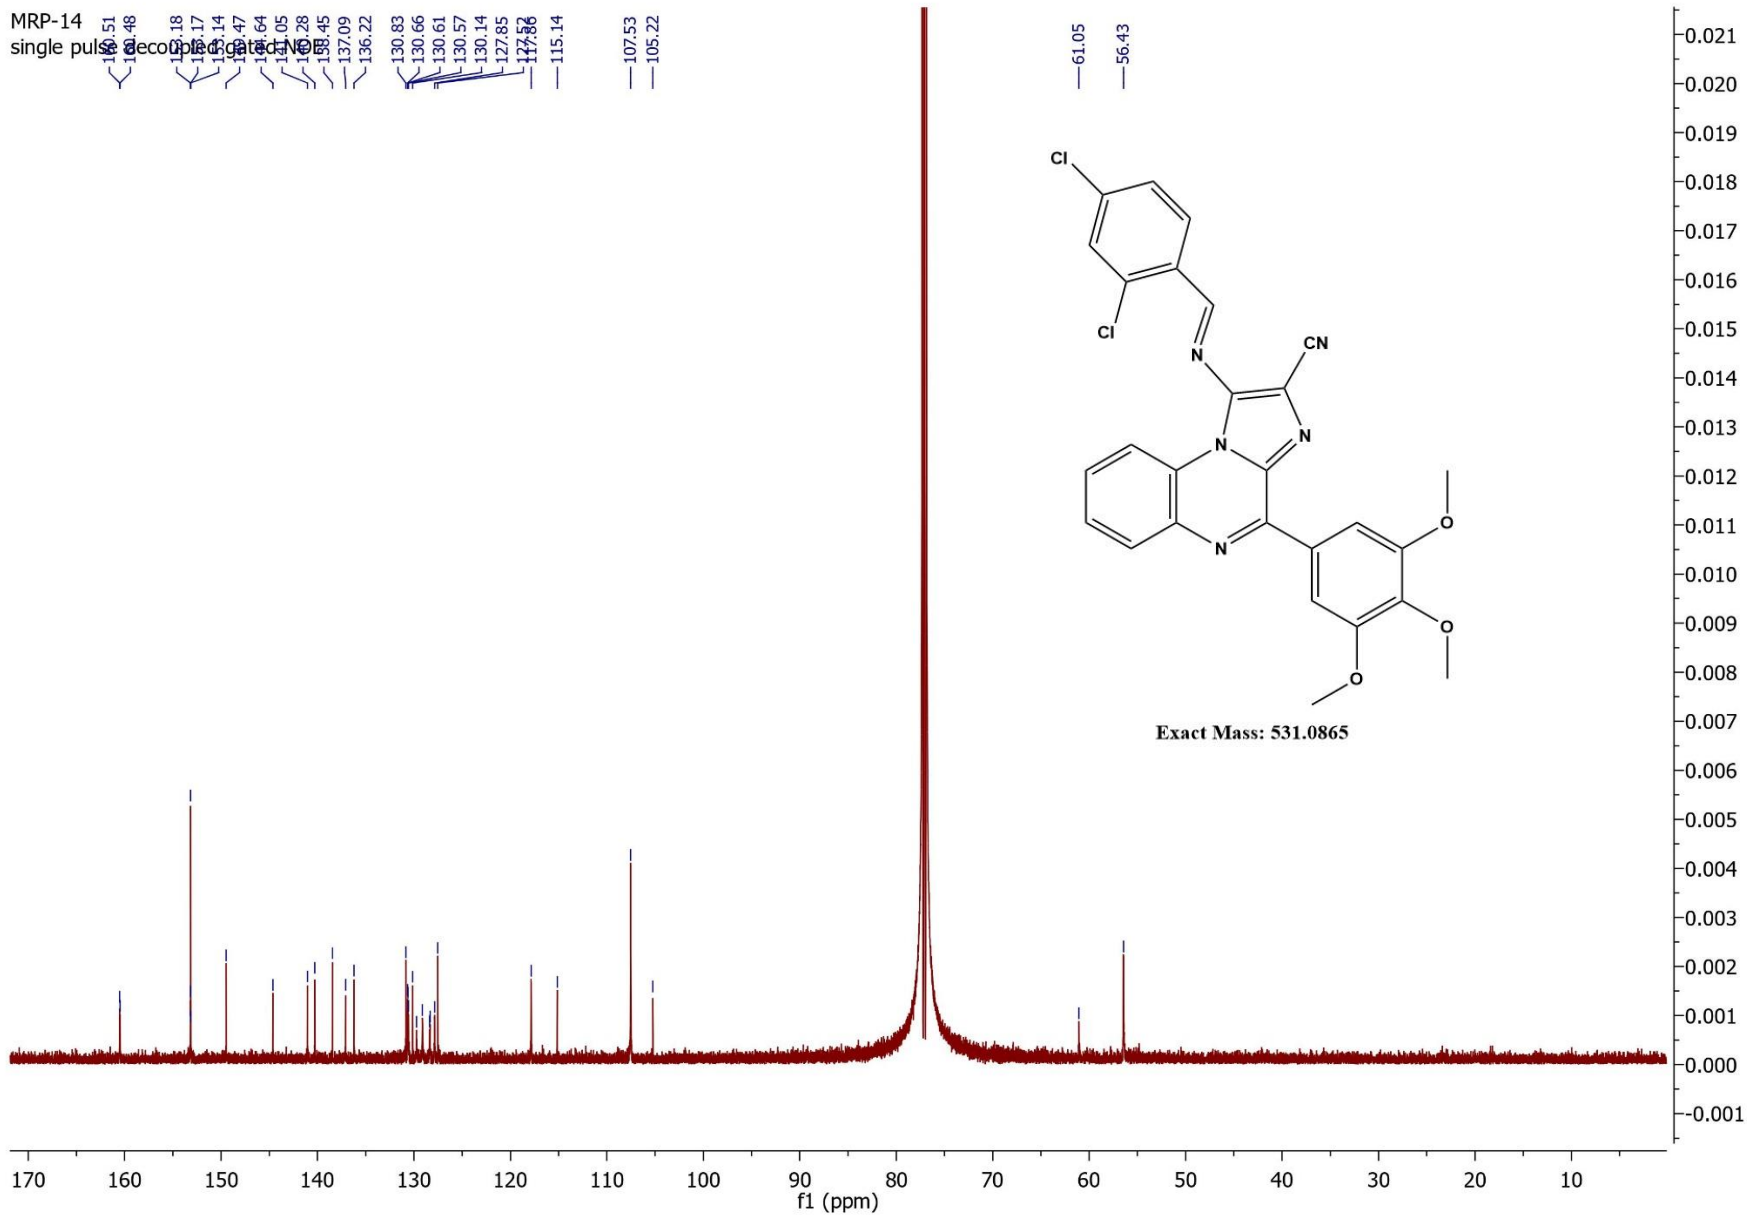

# Elemental Composition Report

## Single Mass Analysis

Tolerance = 10.0 PPM / DBE: min = -1.5, max = 50.0

Element prediction: Off

Number of isotope peaks used for i-FIT = 5

Monoisotopic Mass, Even Electron Ions

4549 formula(e) evaluated with 56 results within limits (up to 1 closest results for  $\epsilon$ )

Elements Used:

C: 0-50 H: 0-100 N: 5-10 O: 0-10 F: 0-4 Cl: 0-2

Sample Name : MRP\_14

IITRPR

Test Name :

23032022\_MRP\_14 8 (0.186)

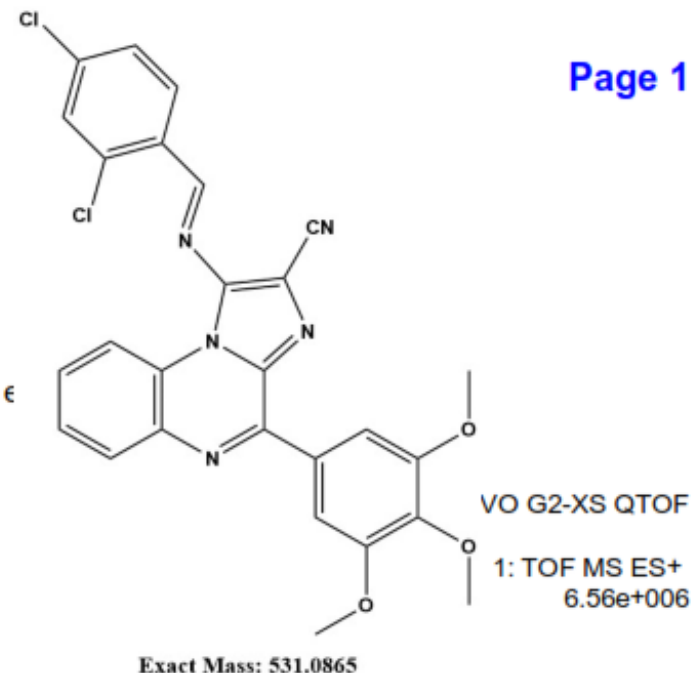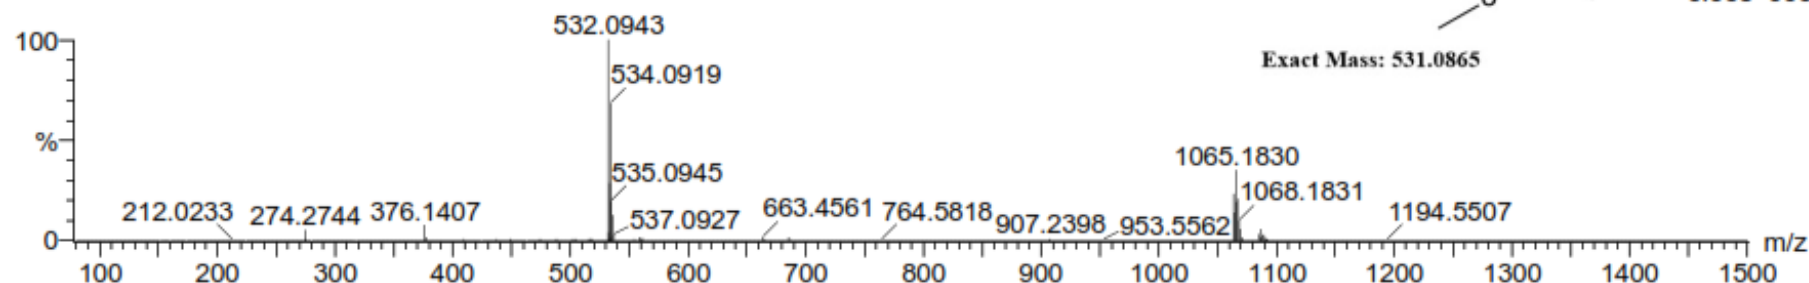

Minimum: -1.5  
Maximum: 2.0 10.0 50.0

| Mass     | Calc. Mass | mDa | PPM | DBE  | i-FIT | Norm | Conf (%) | Formula           |
|----------|------------|-----|-----|------|-------|------|----------|-------------------|
| 532.0943 | 532.0943   | 0.0 | 0.0 | 19.5 | 752.0 | n/a  | n/a      | C27 H20 N5 O3 Cl2 |



# Spectral data of compound 5j

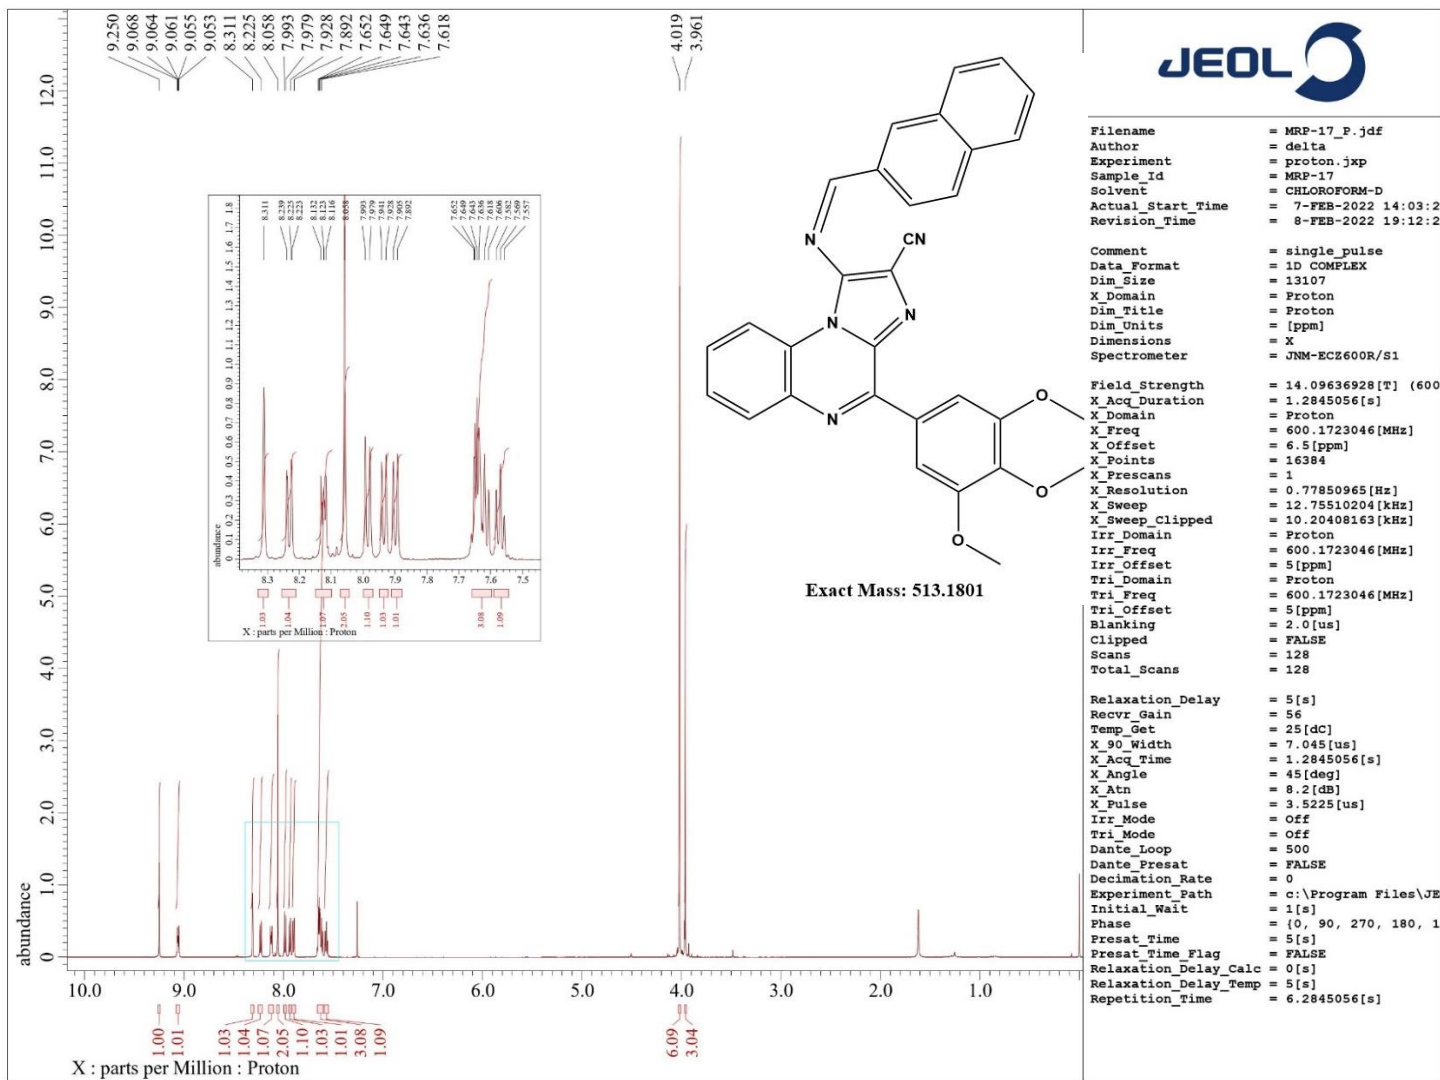

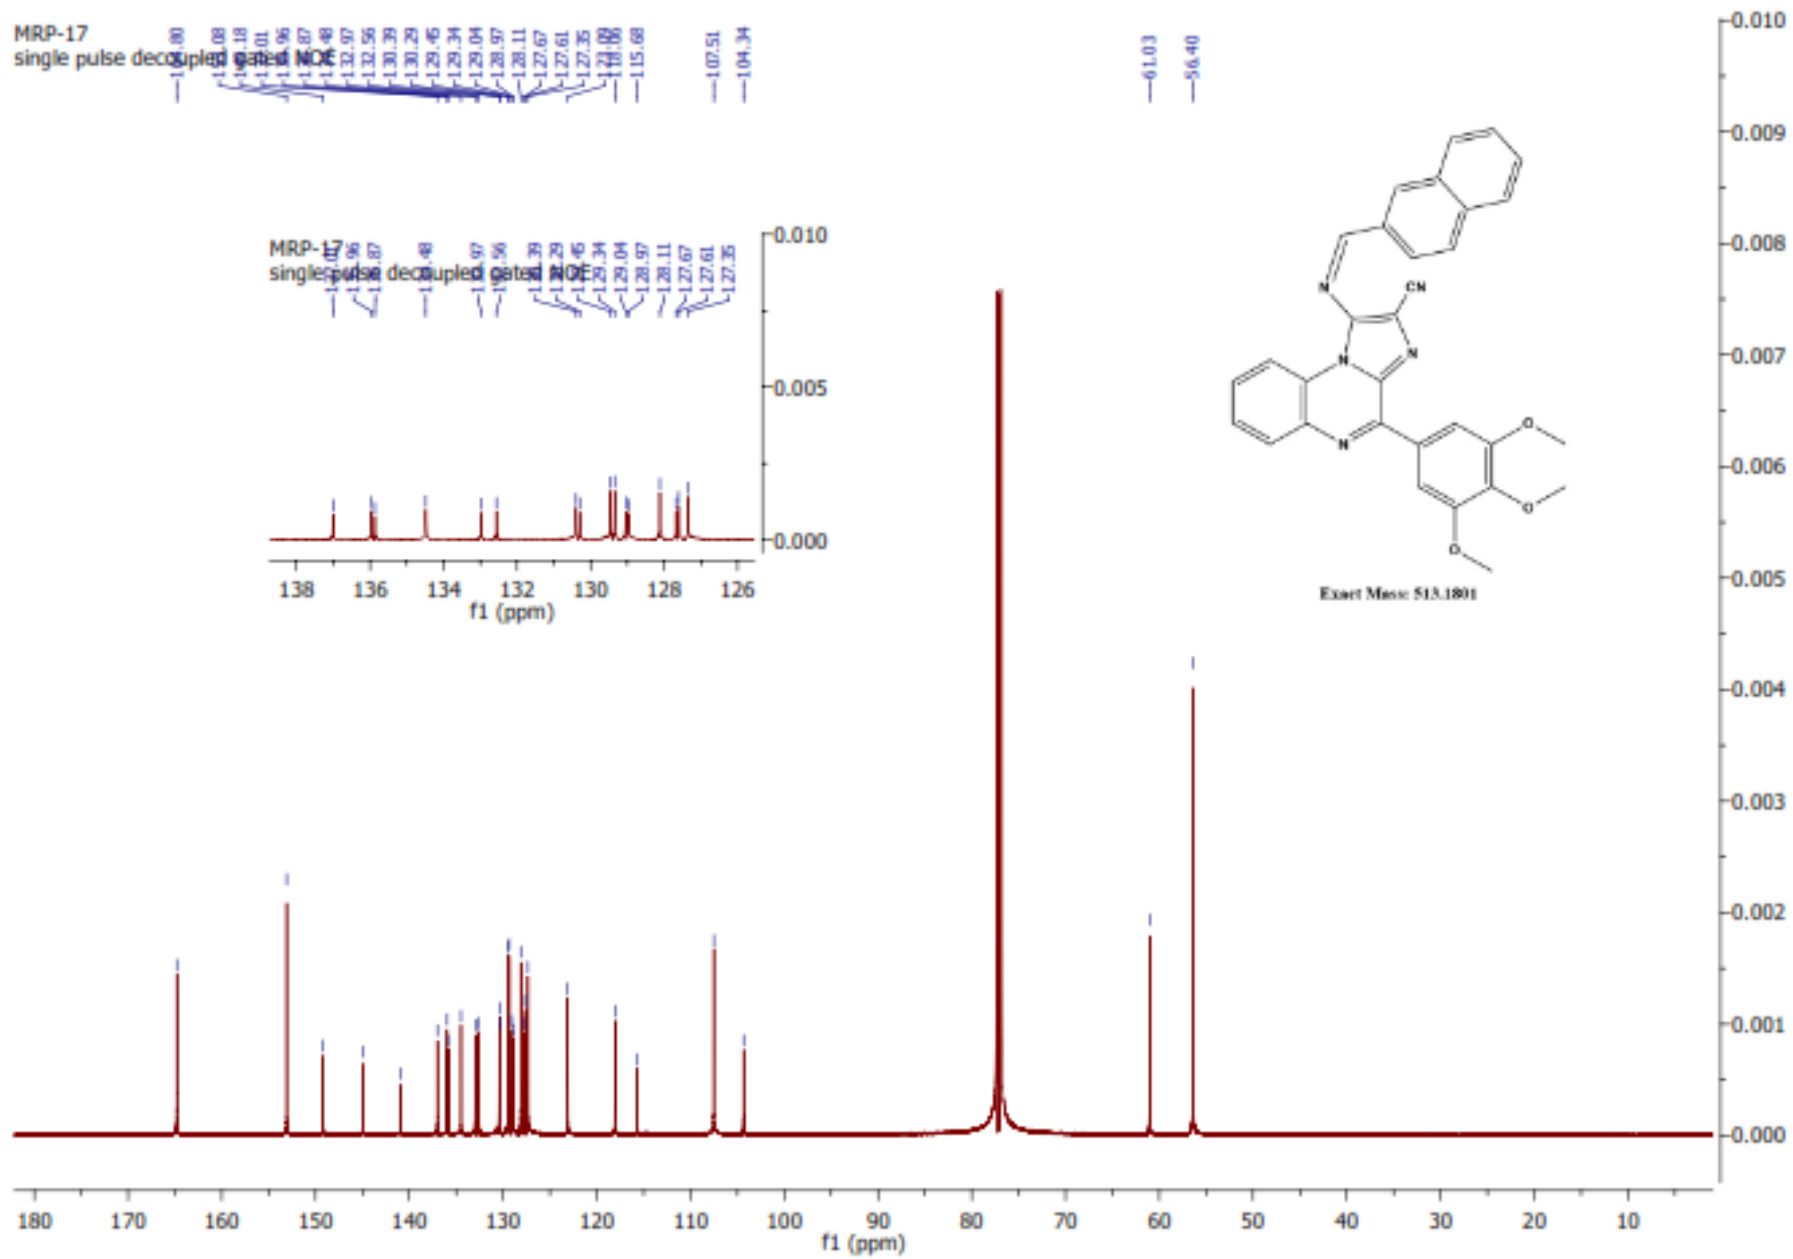

# Elemental Composition Report

## Single Mass Analysis

Tolerance = 10.0 PPM / DBE: min = -1.5, max = 50.0

Element prediction: Off

Number of isotope peaks used for i-FIT = 5

Monoisotopic Mass, Even Electron Ions

357 formula(e) evaluated with 3 results within limits (up to 1 closest results for each mass)

Elements Used:

C: 0-50 H: 0-100 N: 5-10 O: 0-10

Sample Name : MRP\_17

IITRPR

Test Name :

23032022\_MRP\_17 8 (0.186)

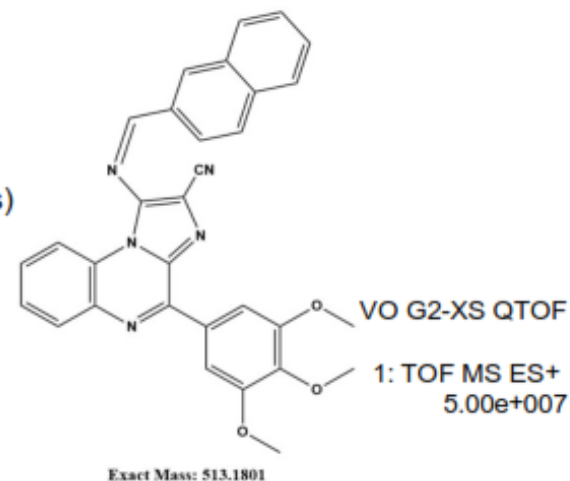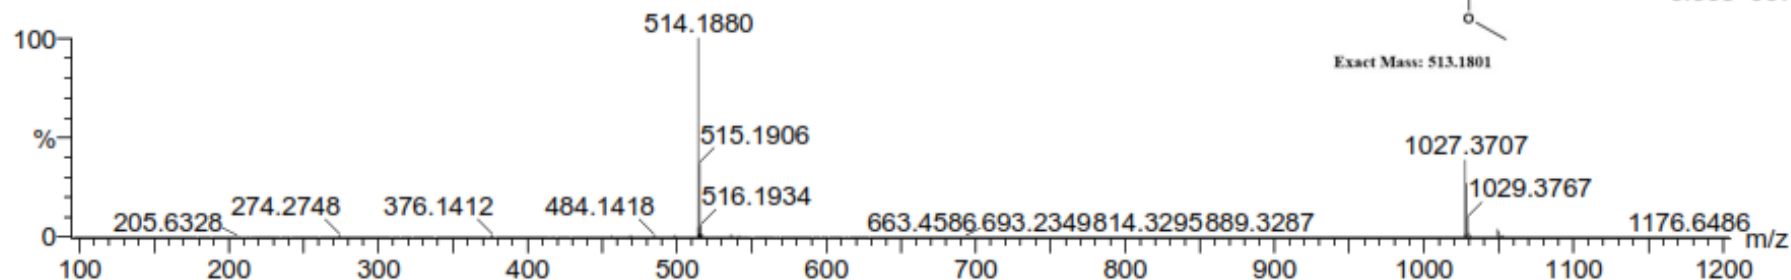

Minimum: -1.5  
Maximum: 2.0 10.0 50.0

| Mass     | Calc. Mass | mDa | PPM | DBE  | i-FIT  | Norm | Conf (%) | Formula       |
|----------|------------|-----|-----|------|--------|------|----------|---------------|
| 514.1880 | 514.1879   | 0.1 | 0.2 | 22.5 | 1323.5 | n/a  | n/a      | C31 H24 N5 O3 |

# Spectral data of compound 5k

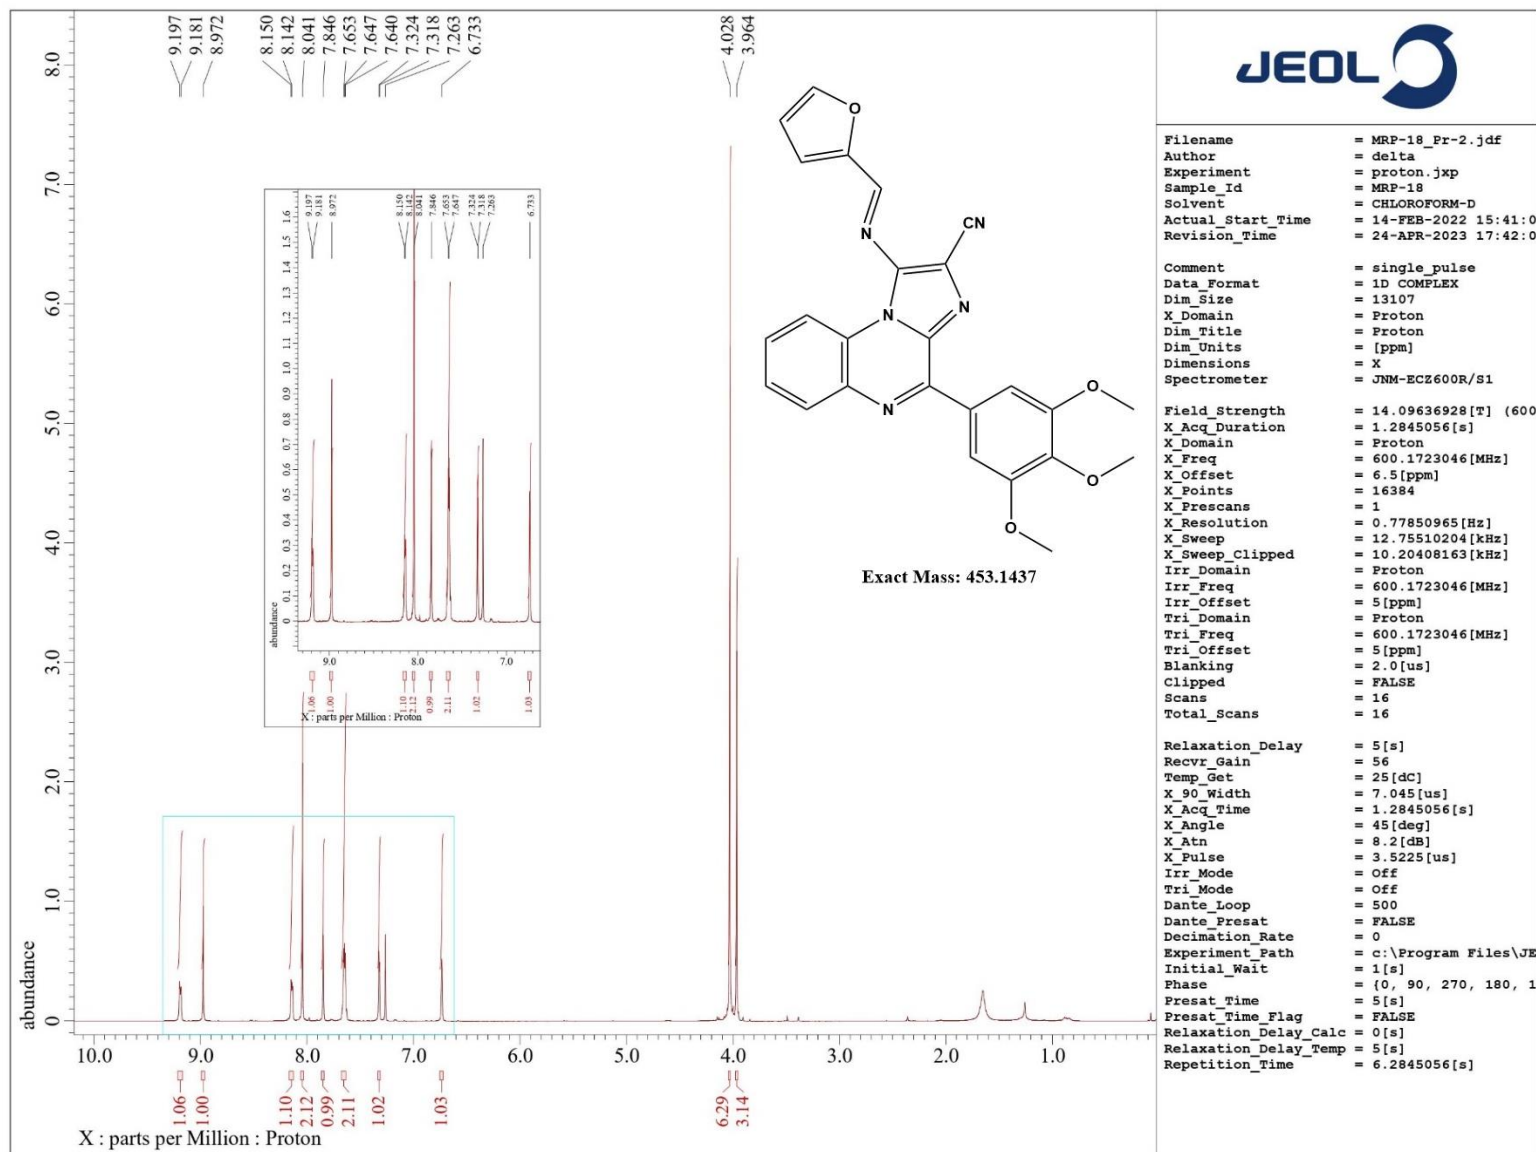

MRP-18  
single pulse decoupled gated NOE

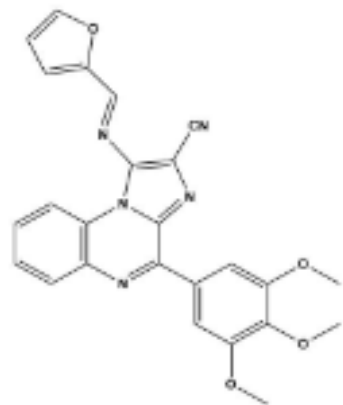

Exact Mass: 453.1437

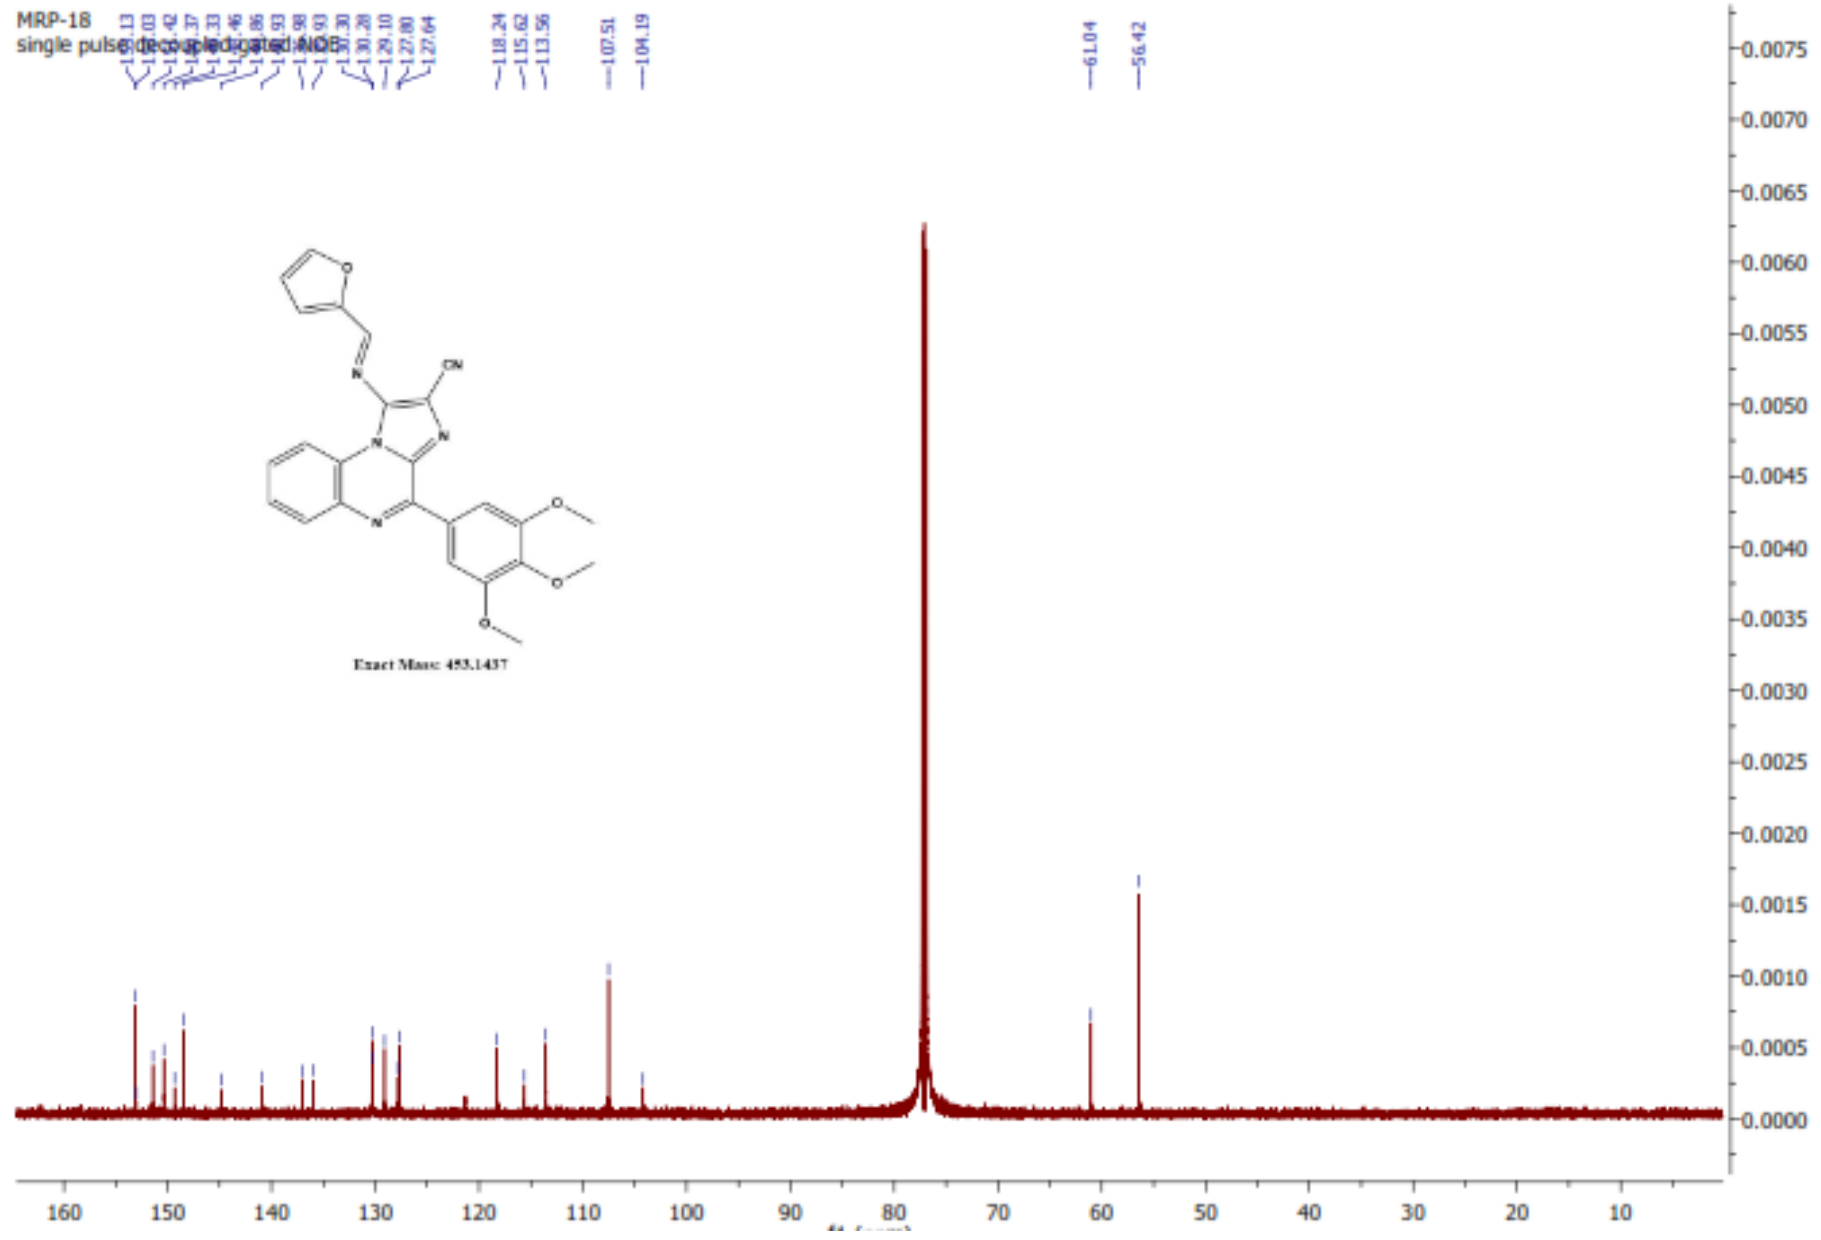

# Elemental Composition Report

## Single Mass Analysis

Tolerance = 10.0 PPM / DBE: min = -1.5, max = 50.0

Element prediction: Off

Number of isotope peaks used for i-FIT = 5

Monoisotopic Mass, Even Electron Ions

314 formula(e) evaluated with 3 results within limits (up to 1 closest results)

Elements Used:

C: 0-50 H: 0-100 N: 5-10 O: 0-10

Sample Name : MRP\_18

Test Name :

23032022\_MRP\_18 12 (0.265)

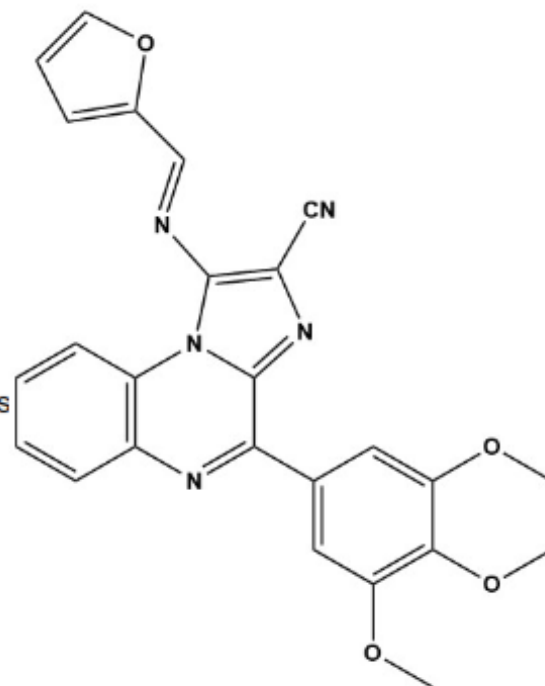

IITRPR

EVO G2-XS QTOF

1: TOF MS ES+  
1.71e+007

Exact Mass: 453.1437

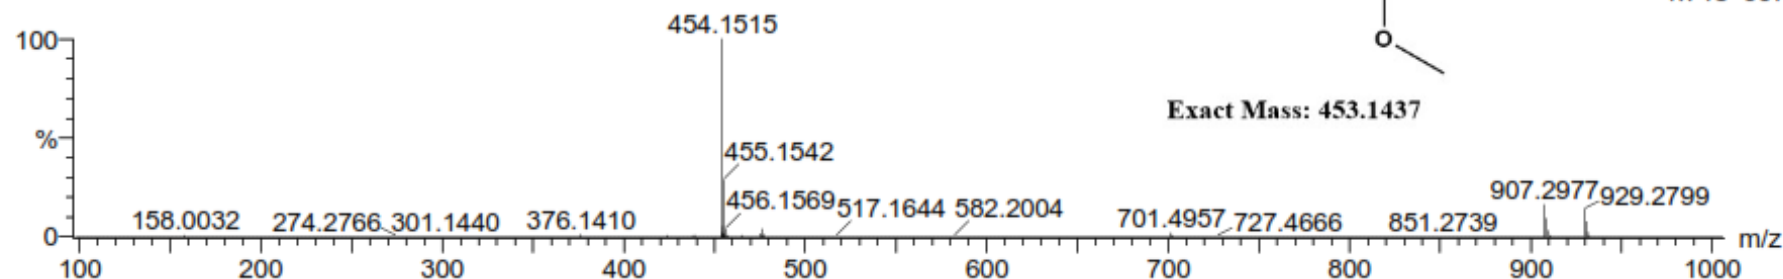

Minimum: -1.5  
Maximum: 2.0 10.0 50.0

| Mass     | Calc. Mass | mDa | PPM | DBE  | i-FIT  | Norm | Conf(%) | Formula       |
|----------|------------|-----|-----|------|--------|------|---------|---------------|
| 454.1515 | 454.1515   | 0.0 | 0.0 | 18.5 | 1331.2 | n/a  | n/a     | C25 H20 N5 O4 |

# Spectral data of compound 51

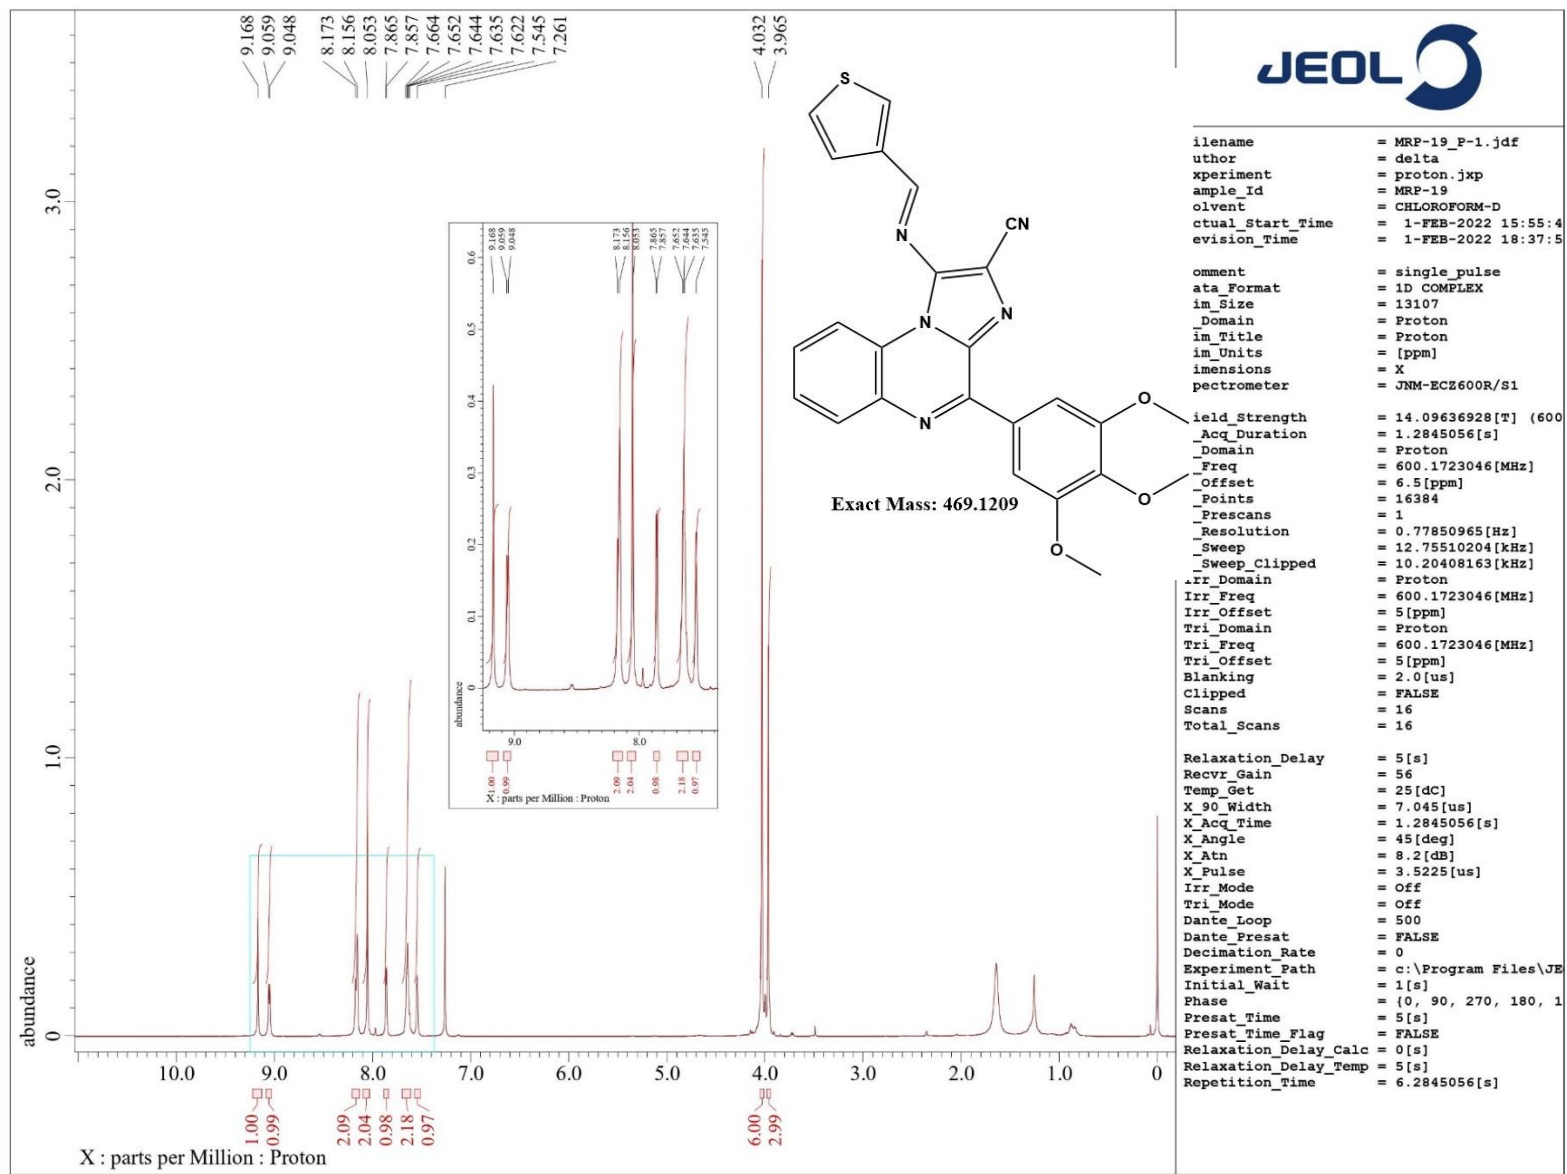

MRP-19

single pulse decoupled

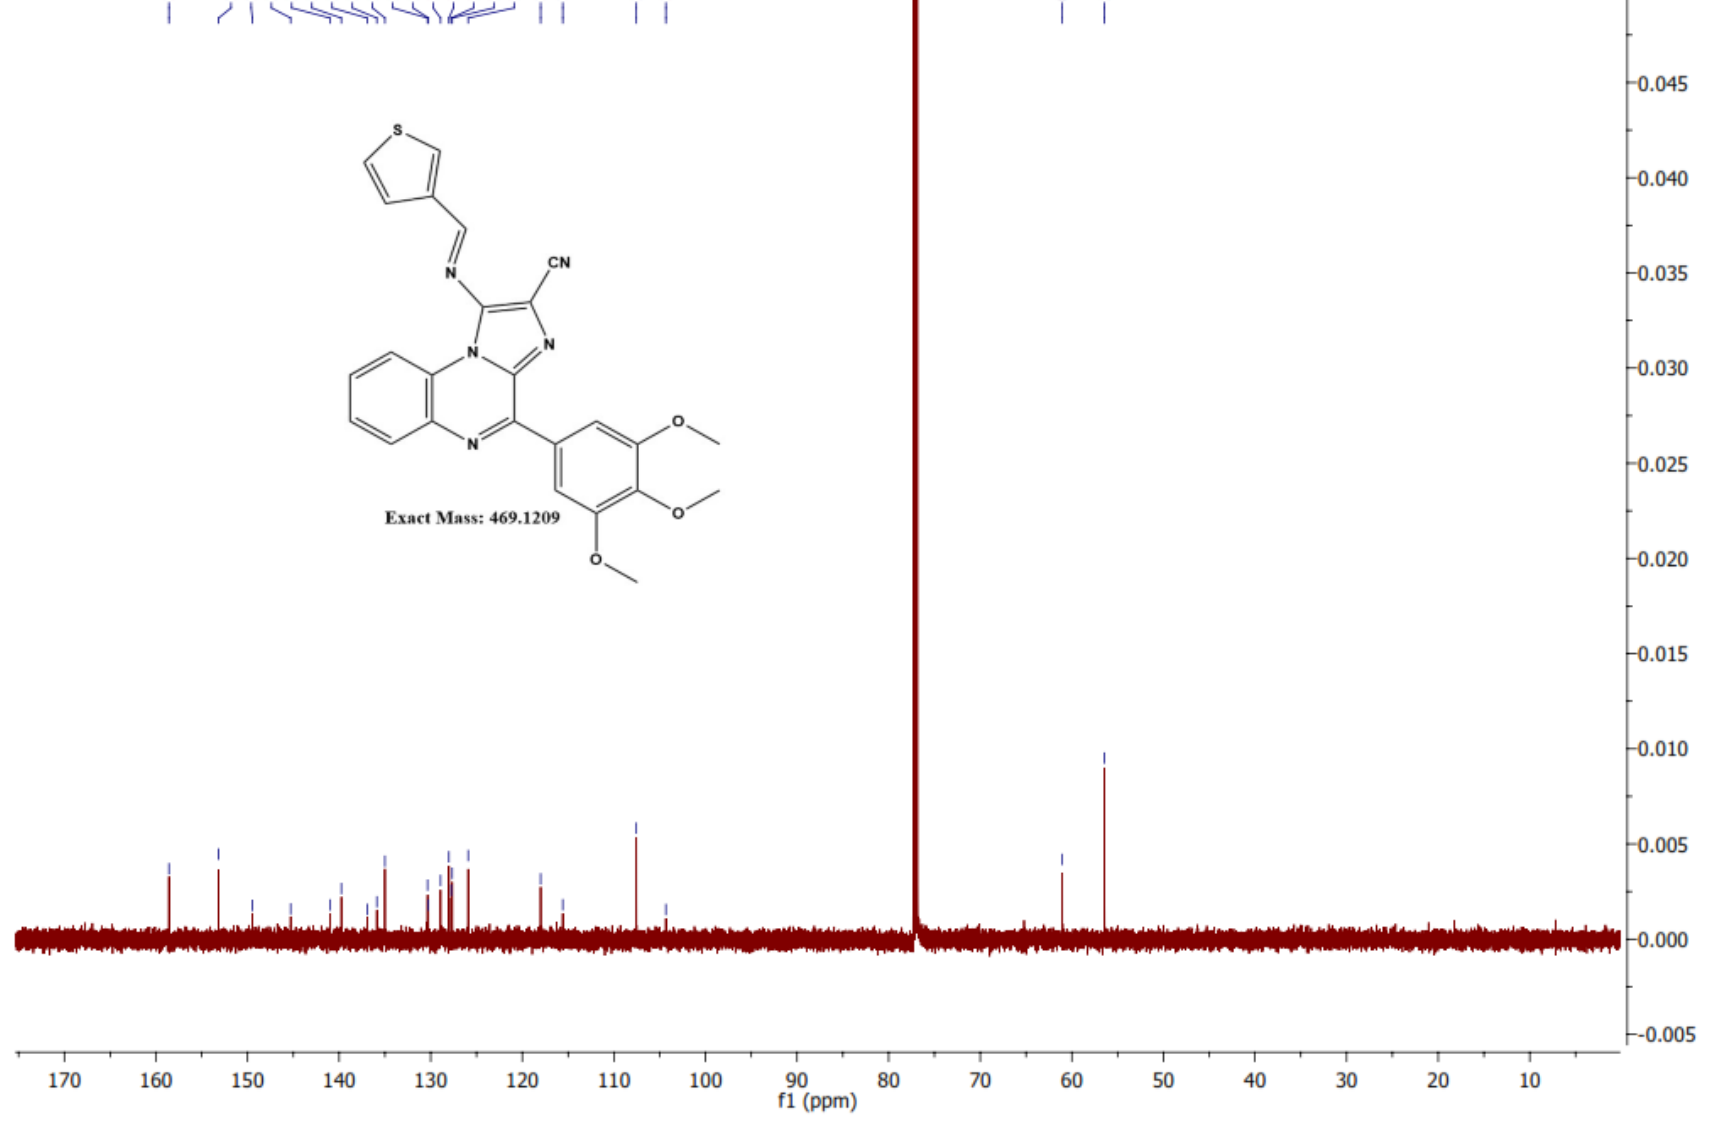



# Elemental Composition Report

## Single Mass Analysis

Tolerance = 10.0 PPM / DBE: min = -1.5, max = 50.0

Element prediction: Off

Number of isotope peaks used for i-FIT = 5

Monoisotopic Mass, Even Electron Ions

1141 formula(e) evaluated with 13 results within limits (up to 1 closest results f

Elements Used:

C: 0-50 H: 0-100 N: 5-10 O: 0-10 S: 0-3

Sample Name : MRP\_19

Test Name :

23032022\_MRP\_19 9 (0.203)

IITRPR

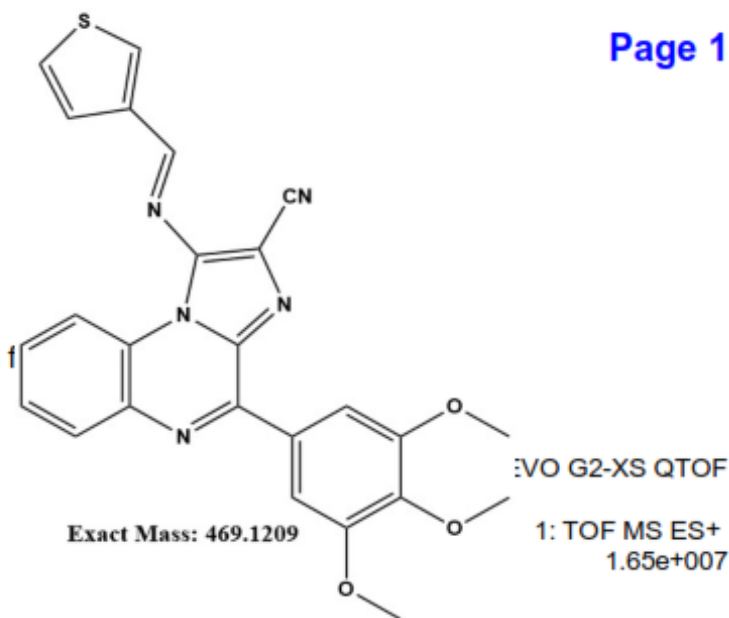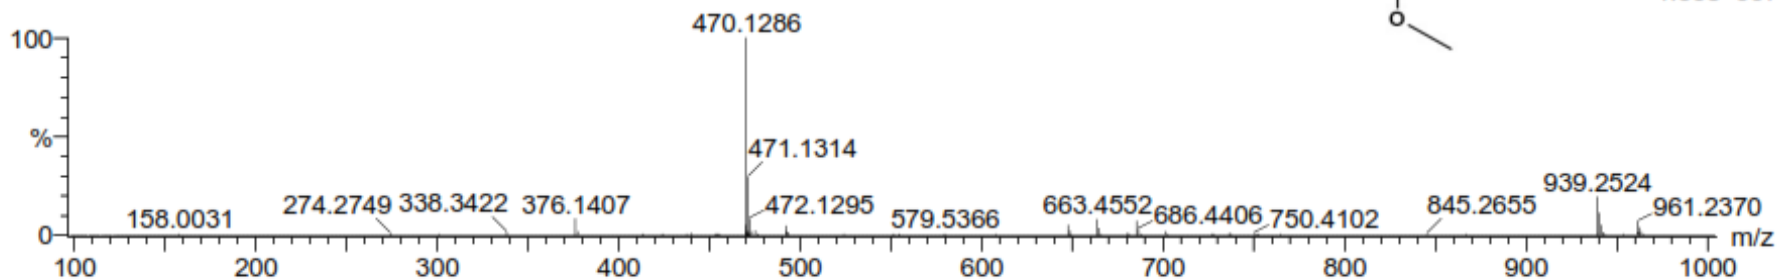

Minimum: -1.5  
Maximum: 2.0 10.0 50.0

| Mass     | Calc. Mass | mDa  | PPM  | DBE  | i-FIT  | Norm | Conf (%) | Formula         |
|----------|------------|------|------|------|--------|------|----------|-----------------|
| 470.1286 | 470.1287   | -0.1 | -0.2 | 18.5 | 1391.3 | n/a  | n/a      | C25 H20 N5 O3 S |

# Spectral data of compound 5m

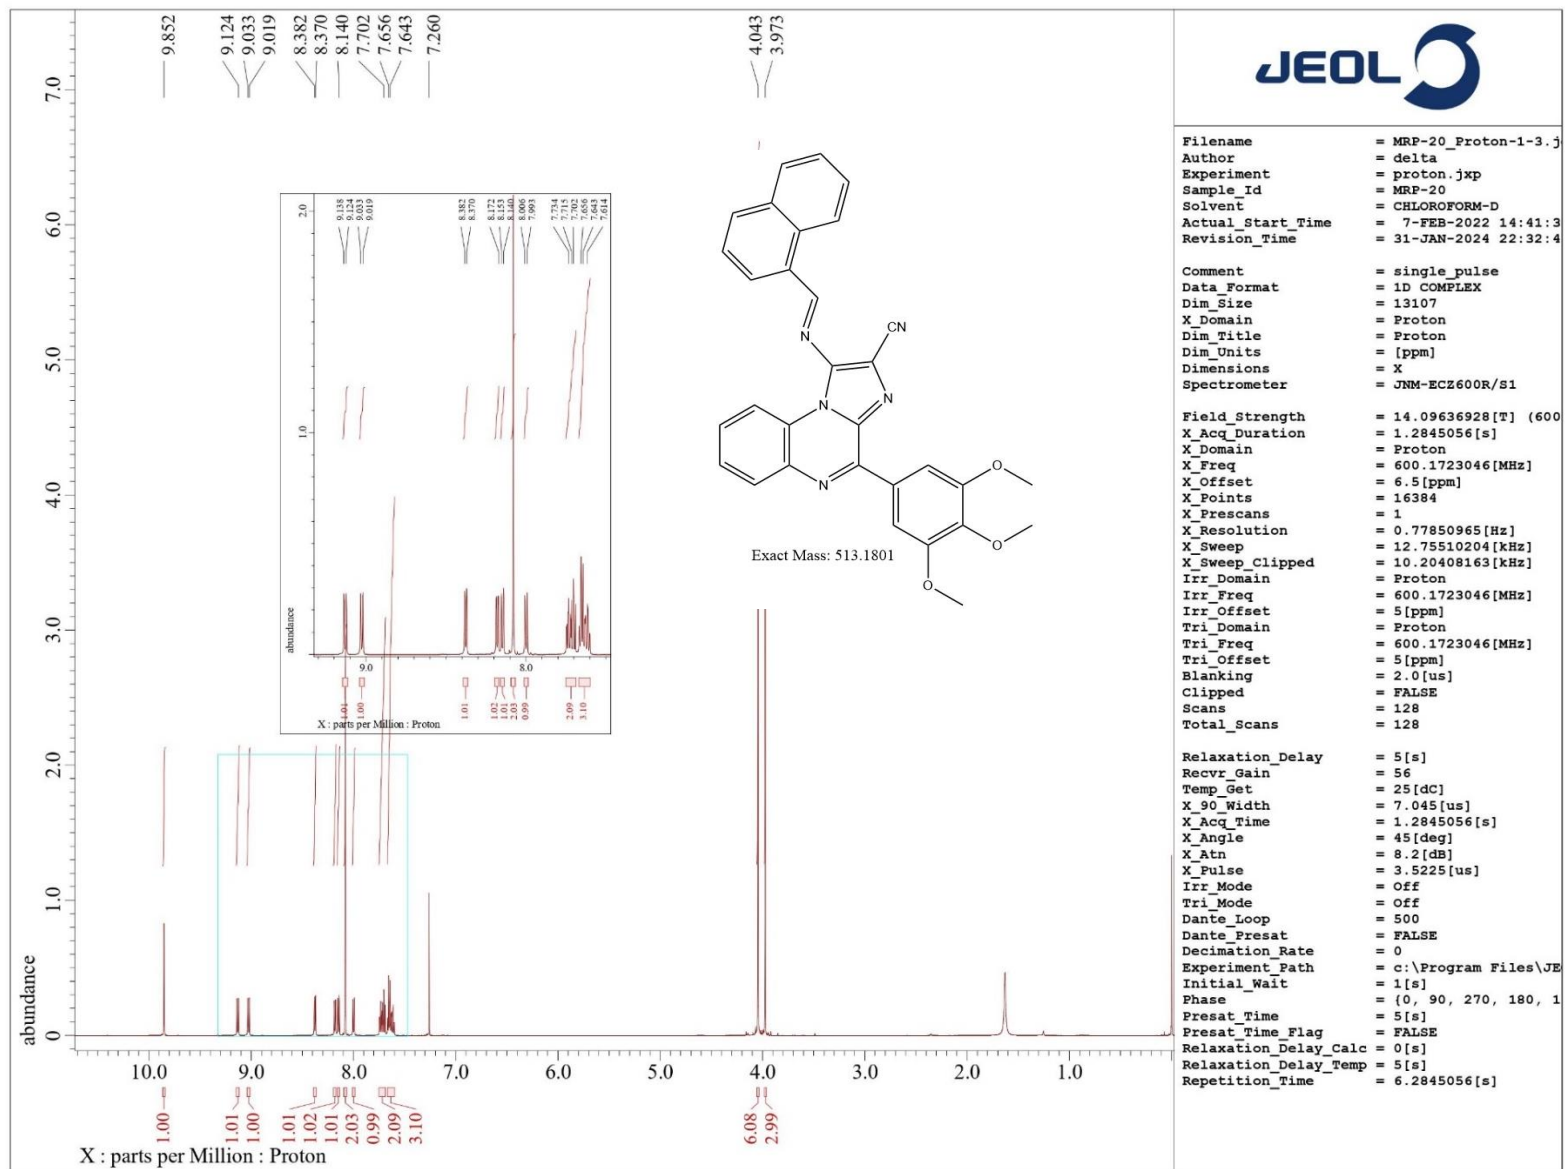

MRP-20  
single pulse decoupled gated NOE

164.39  
153.16  
149.49  
135.98  
134.76  
134.09  
131.97  
131.65  
130.40  
130.10  
129.32  
129.01  
128.77  
127.69  
126.97  
125.52  
123.98  
123.56  
115.76  
107.57  
104.48

61.05  
56.45

MRP-20  
single pulse decoupled gated NOE  
135.96  
135.98  
134.76  
134.09  
131.97  
131.65  
130.40  
130.10  
129.32  
129.01  
128.77  
127.69  
126.97  
125.52  
123.56

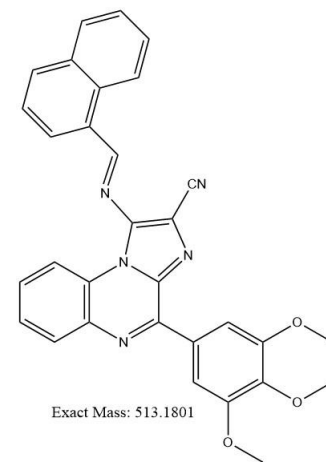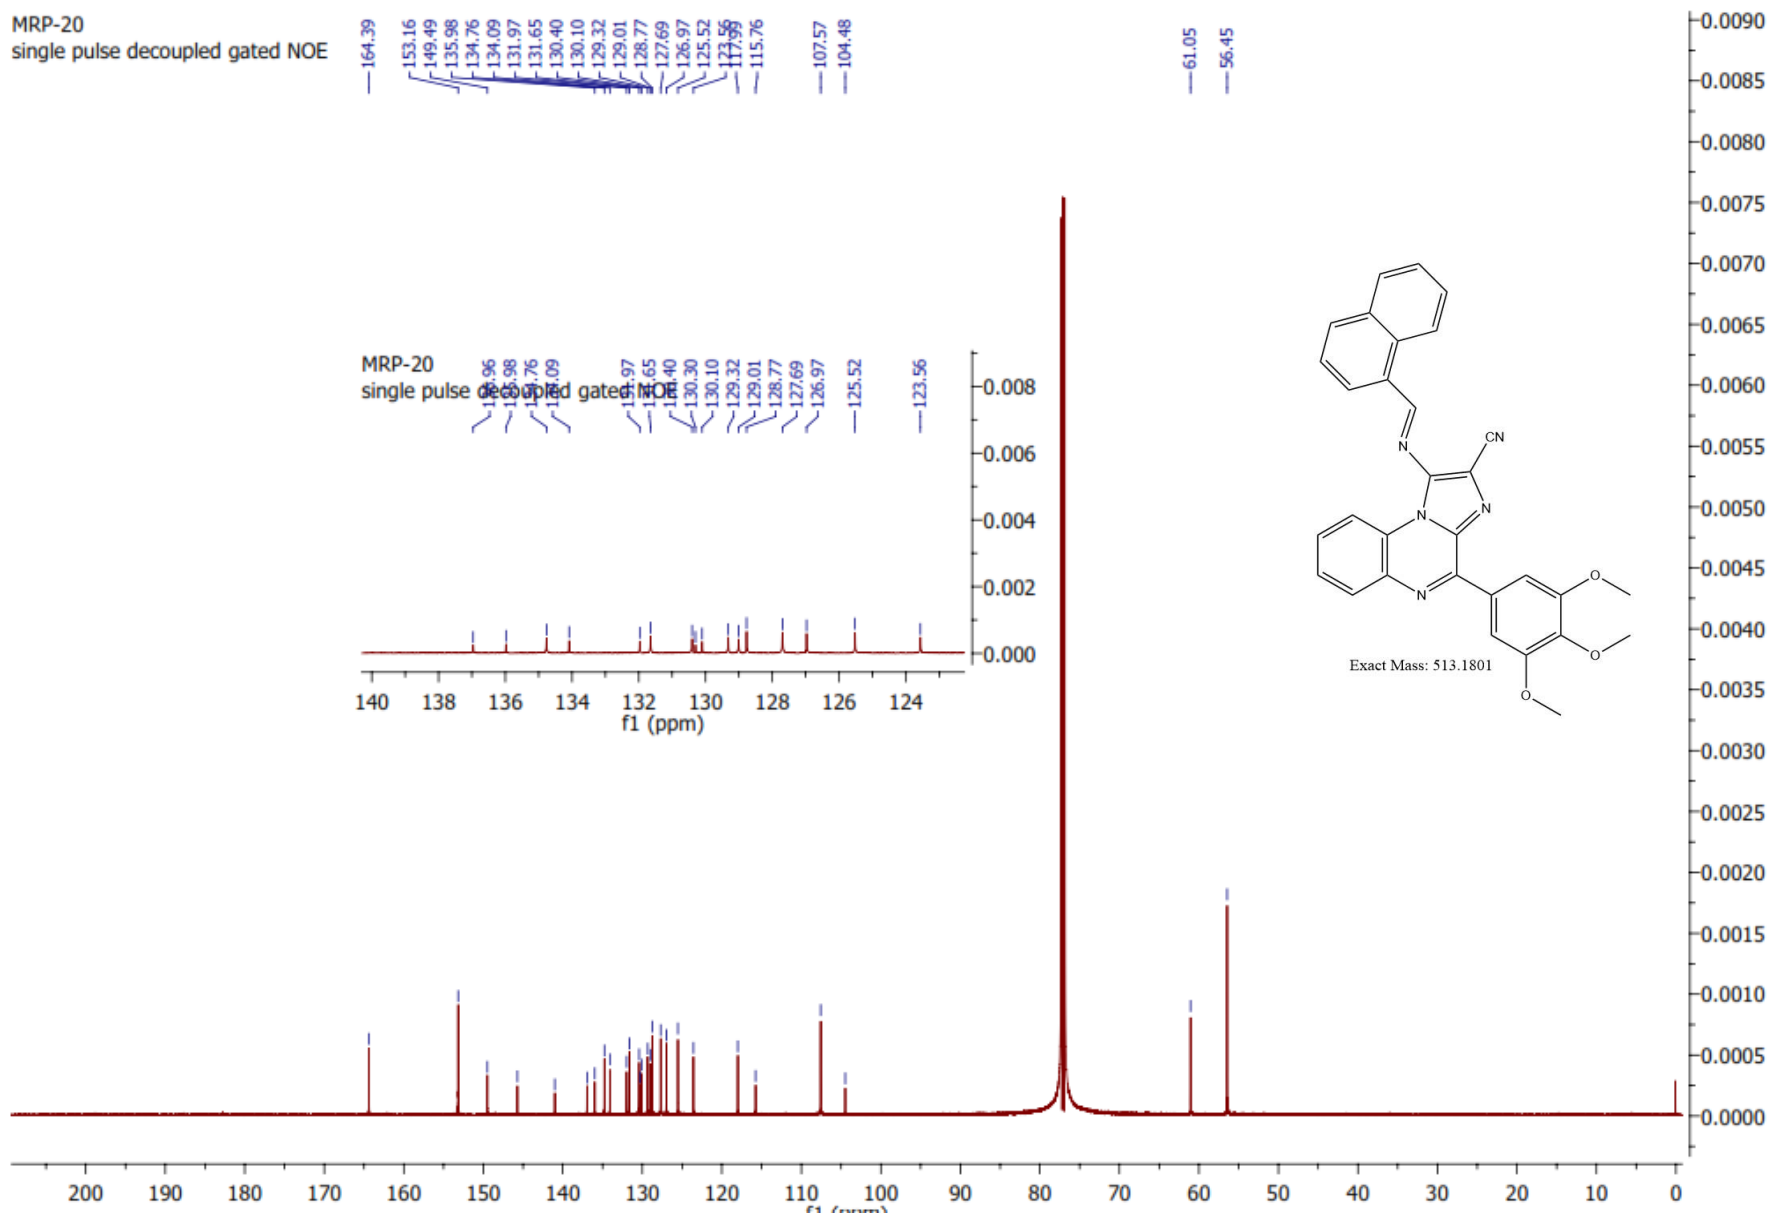

## Elemental Composition Report

Page 1

### Single Mass Analysis

Tolerance = 10.0 PPM / DBE: min = -1.5, max = 50.0

Element prediction: Off

Number of isotope peaks used for i-FIT = 5

Monoisotopic Mass, Even Electron Ions

1279 formula(e) evaluated with 13 results within limits (up to 1 closest results for

Elements Used:

C: 0-50 H: 0-100 N: 5-10 O: 0-10 S: 0-3

Sample Name : MRP\_20

Test Name :

23032022\_MRP\_20 8 (0.186)

IITRPR

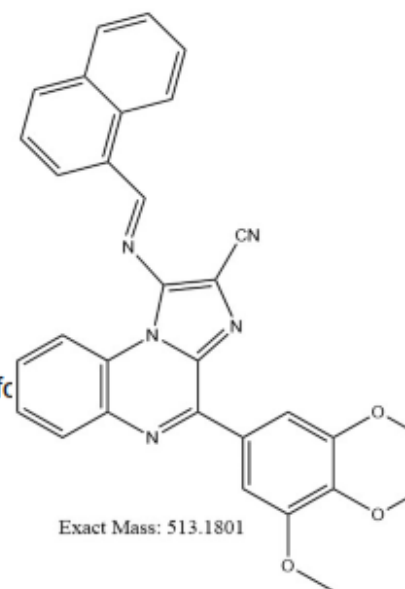

XEVO G2-XS QTOF

1: TOF MS ES+  
4.63e+007

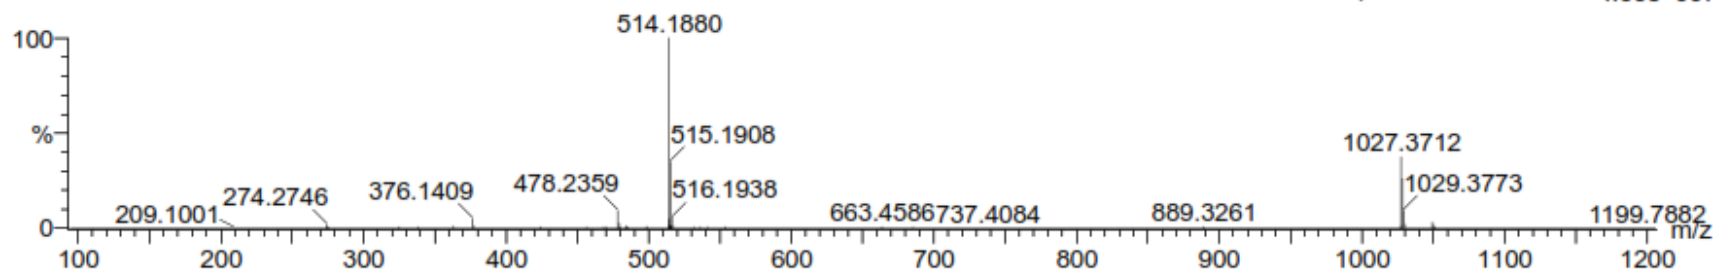

Minimum: -1.5

Maximum: 2.0 10.0 50.0

| Mass     | Calc. Mass | mDa | PPM | DBE  | i-FIT  | Norm | Conf (%) | Formula       |
|----------|------------|-----|-----|------|--------|------|----------|---------------|
| 514.1880 | 514.1879   | 0.1 | 0.2 | 22.5 | 1491.4 | n/a  | n/a      | C31 H24 N5 O3 |

# Spectral data of compound 5n

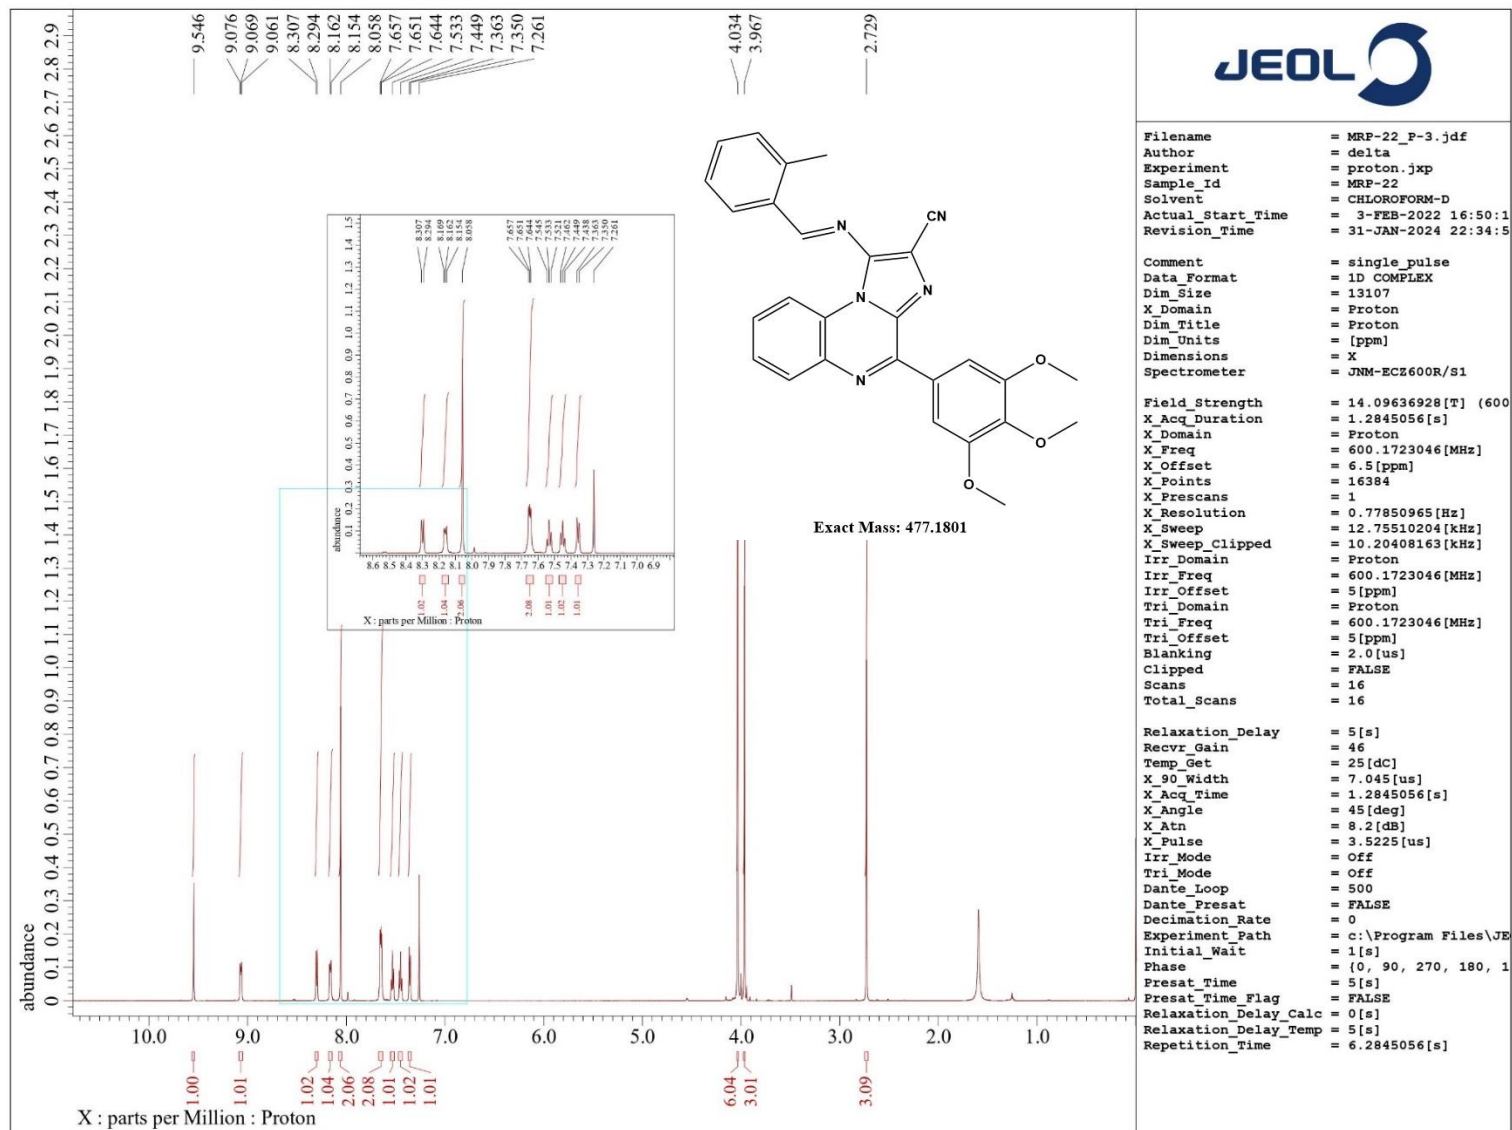

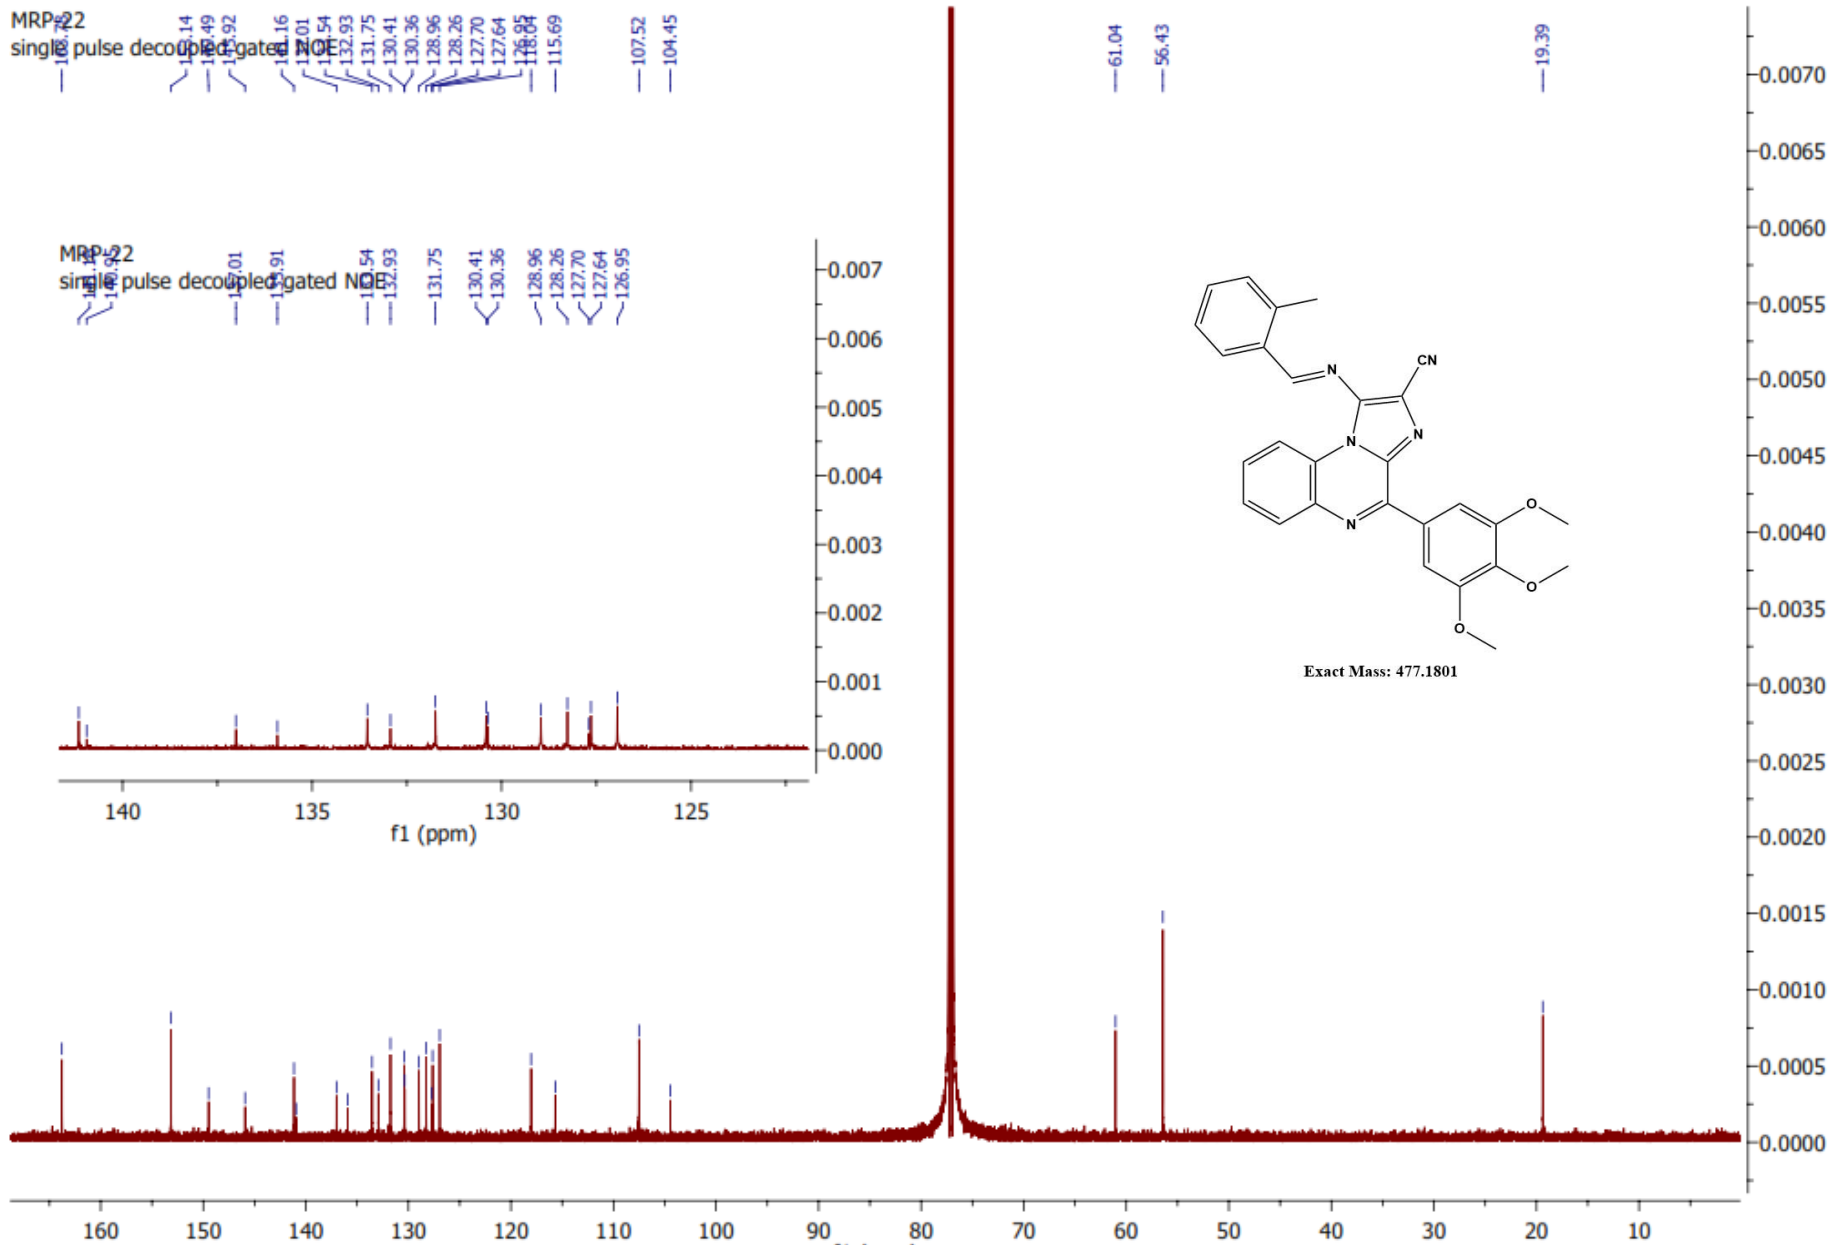

# Elemental Composition Report

## Single Mass Analysis

Tolerance = 10.0 PPM / DBE: min = -1.5, max = 50.0

Element prediction: Off

Number of isotope peaks used for i-FIT = 5

Monoisotopic Mass, Even Electron Ions

1169 formula(e) evaluated with 11 results within limits (up to 1 closest results for)

Elements Used:

C: 0-50 H: 0-100 N: 5-10 O: 0-10 S: 0-3

Sample Name : MRP\_22

Test Name :

23032022\_MRP\_22 8 (0.186)

IITRPR

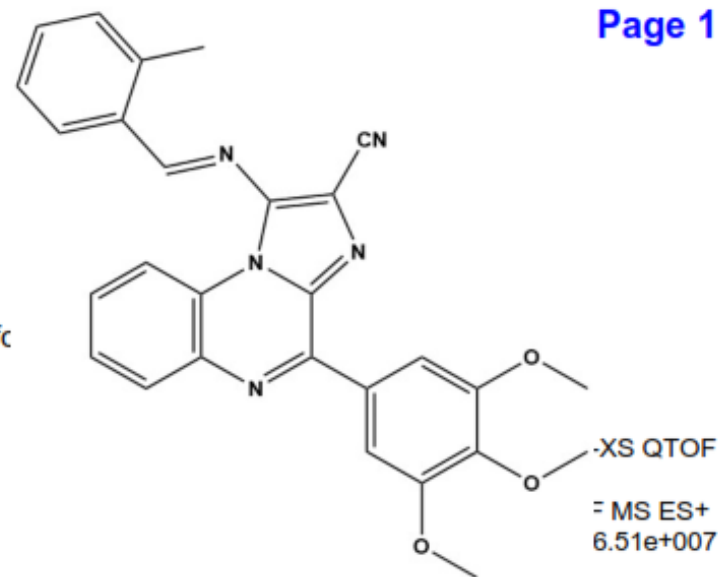

Exact Mass: 477.1801

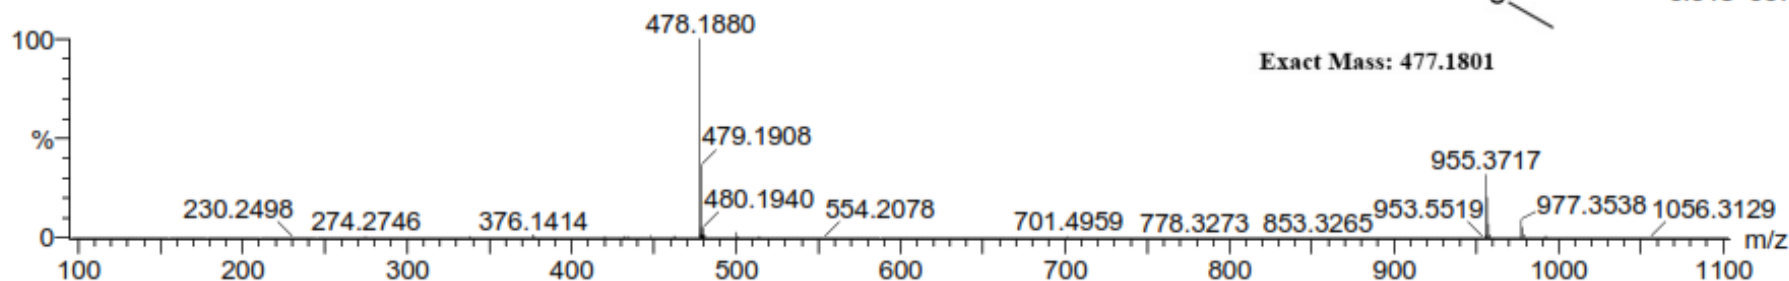

Minimum: -1.5  
Maximum: 2.0 10.0 50.0

| Mass     | Calc. Mass | mDa | PPM | DBE  | i-FIT  | Norm | Conf(%) | Formula                                                       |
|----------|------------|-----|-----|------|--------|------|---------|---------------------------------------------------------------|
| 478.1880 | 478.1879   | 0.1 | 0.2 | 19.5 | 1467.9 | n/a  | n/a     | C <sub>28</sub> H <sub>24</sub> N <sub>5</sub> O <sub>3</sub> |



# Spectral data of compound 5o

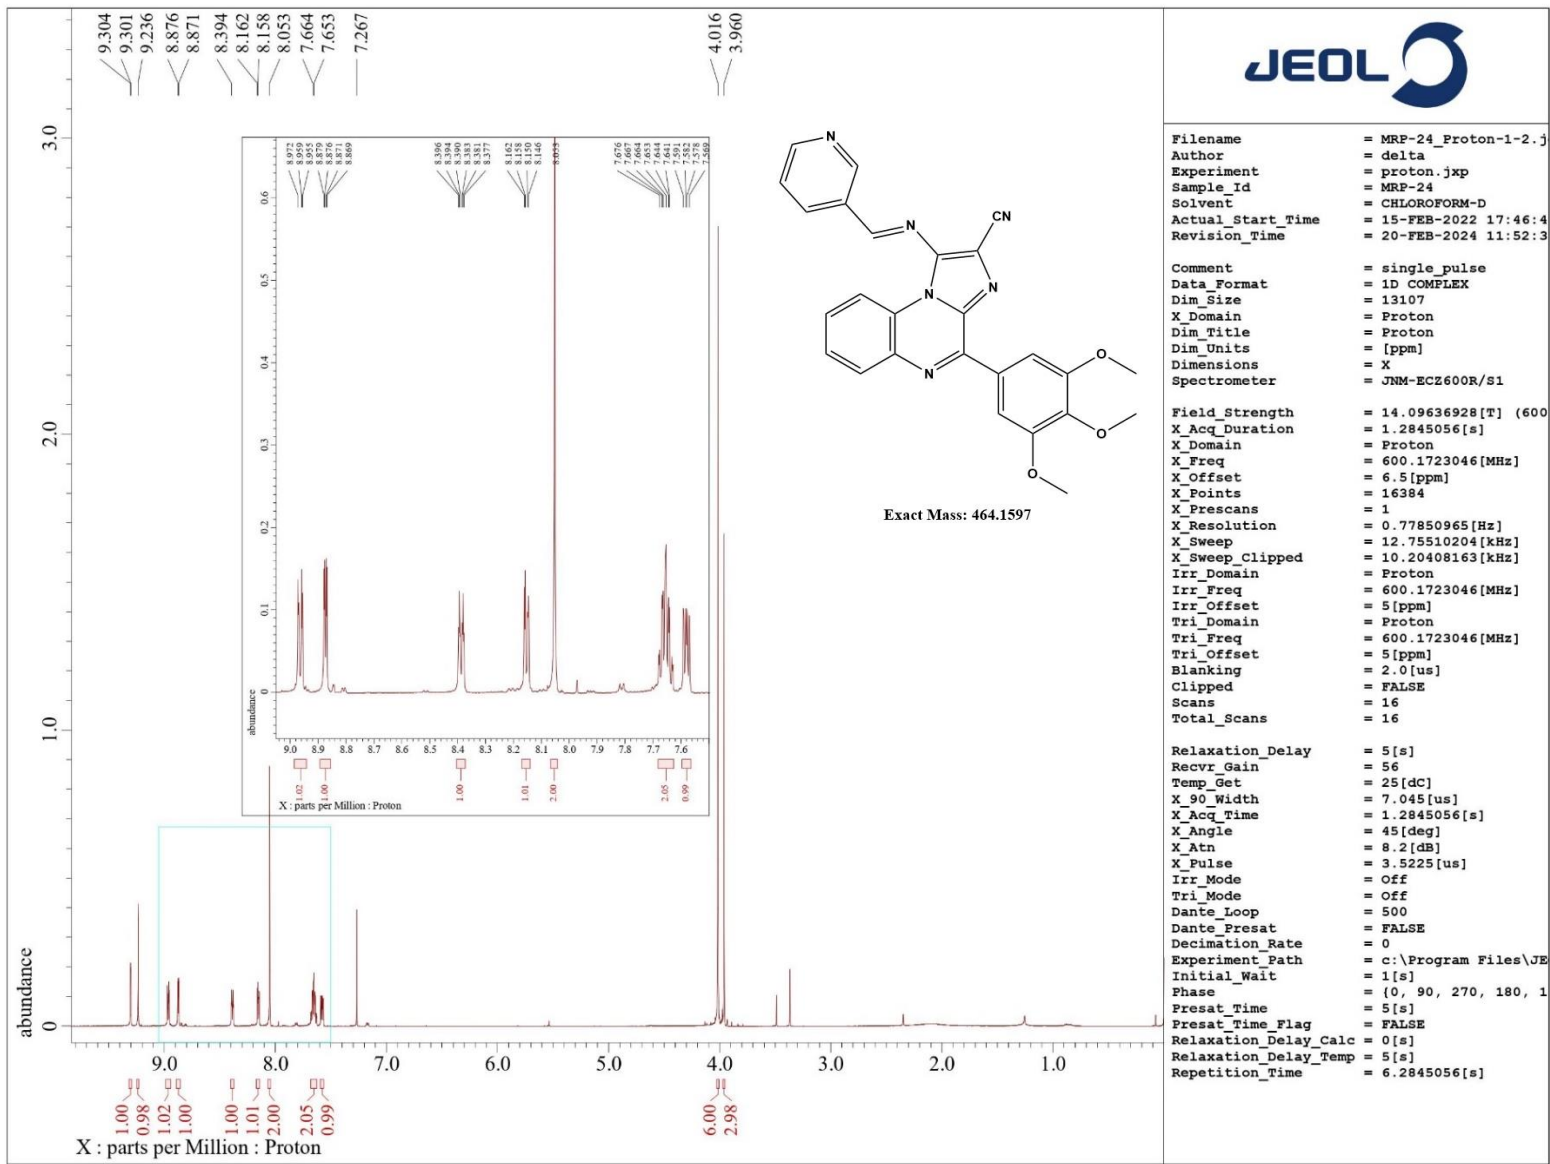



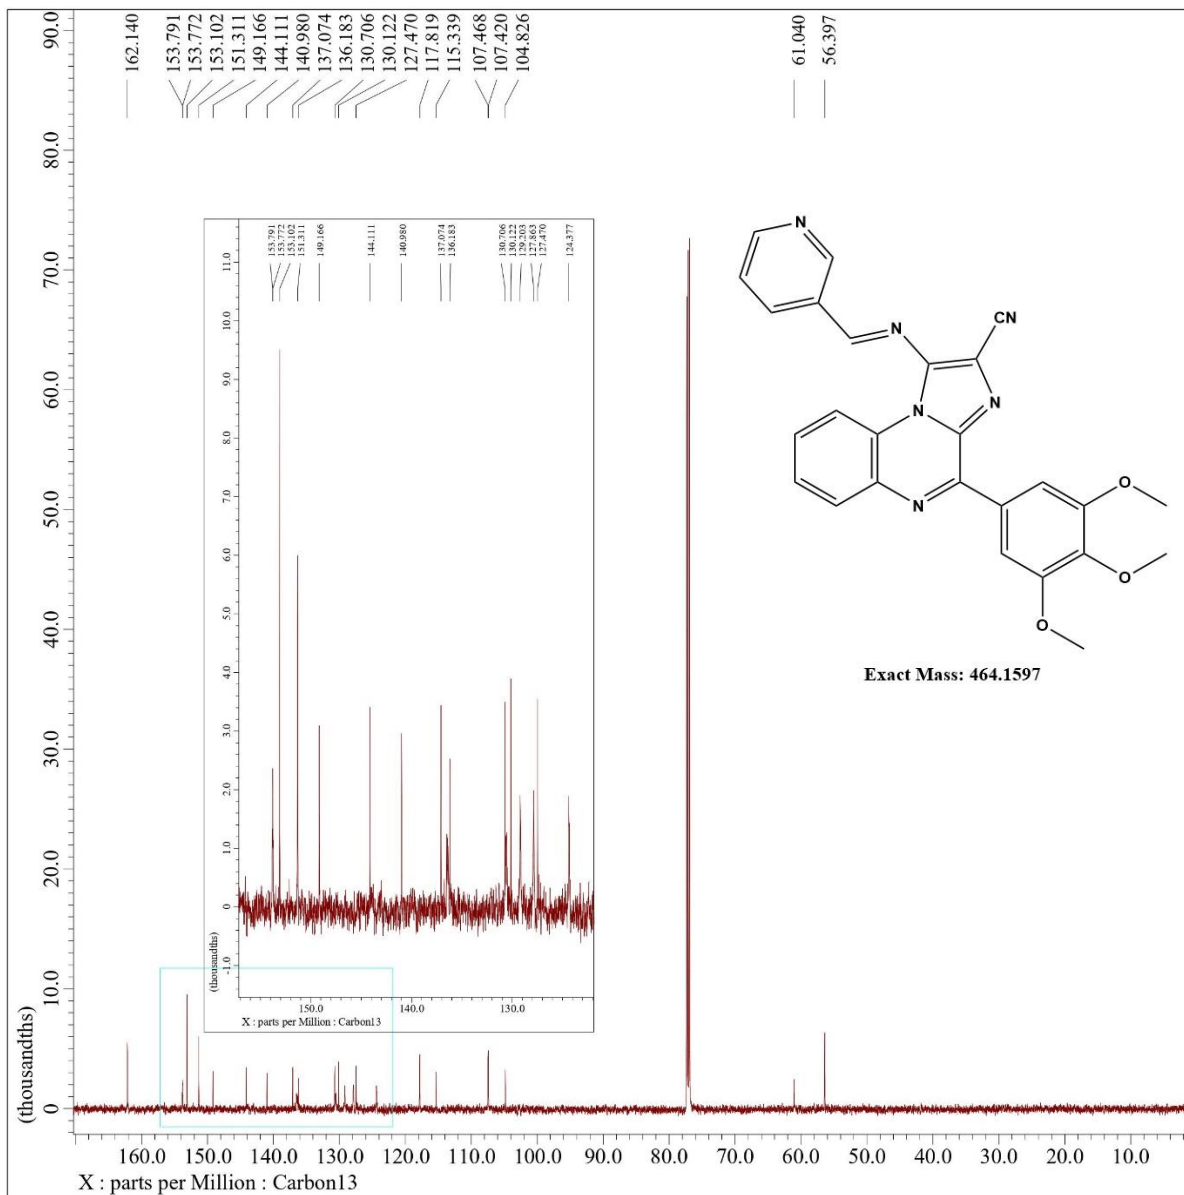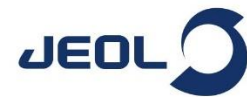

```

Filename           = MRP-24_Carbon-1-
Author             = delta
Experiment         = carbon.jxp
Sample_Id         = MRP-24
Solvent           = CHLOROFORM-D
Actual_Start_Time = 15-FEB-2022 17:4
Revision_Time     = 20-FEB-2024 09:0

Comment           = single pulse dec
Data_Format       = 1D COMPLEX
Dim_Size          = 26214
X_Domain          = Carbon13
Dim_Title         = Carbon13
Dim_Units         = [ppm]
Dimensions        = X
Spectrometer      = JNM-ECZ600R/S1

Field_Strength    = 14.09636928[T] (
X_Acq_Duration    = 0.69206016[s]
X_Domain          = Carbon13
X_Freq            = 150.91343039[MHz]
X_Offset          = 100[ppm]
X_Points          = 32768
X_Prescans        = 4
X_Resolution      = 1.44496109[Hz]
X_Sweep           = 47.34848485[kHz]
X_Sweep_Clipped  = 37.87878788[kHz]
Irr_Domain        = Proton
Irr_Freq          = 600.1723046[MHz]
Irr_Offset        = 5[ppm]
Blanking          = 2.0[us]
Clipped           = TRUE
Scans             = 512
Total_Scans       = 512

Relaxation_Delay  = 2[s]
Recvr_Gain        = 56
Temp_Get          = 25[dc]
X_90_Width        = 11.025[us]
X_Acq_Time        = 0.69206016[s]
X_Angle           = 30[deg]
X_Atn             = 10.4[db]
X_Pulse           = 3.675[us]
Irr_Atn_Dec       = 28.859[db]
Irr_Atn_Dec_Calc = 28.859[db]
Irr_Atn_Dec_Default_Calc = 28.859[db]
Irr_Atn_Noise    = 28.859[db]
Irr_Dec_Bandwidth_Hz = 7.23684211[kHz]
Irr_Dec_Bandwidth_Ppm = 12.05794078[ppm]
Irr_Dec_Freq      = 600.1723046[MHz]
Irr_Dec_Merit_Factor = 2.2
Irr_Decoupling   = TRUE
Irr_Noise        = TRUE
Irr_Noise        = WALTZ
Irr_Offset_Default = 5[ppm]
Irr_Pwidth       = 76[us]
Irr_Pwidth_Default = 76[us]
Irr_Pwidth_Default_Calc = 76[us]
Irr_Pwidth_Temp1 = 76[us]
Irr_Wurst        = FALSE
Decimation_Rate  = 0
Experiment_Path  = c:\Program Files
Initial_Wait     = 1[s]
Noe_Time         = 2[s]
  
```

## 2D-Spectral data of compound 5o

### DEPT-135

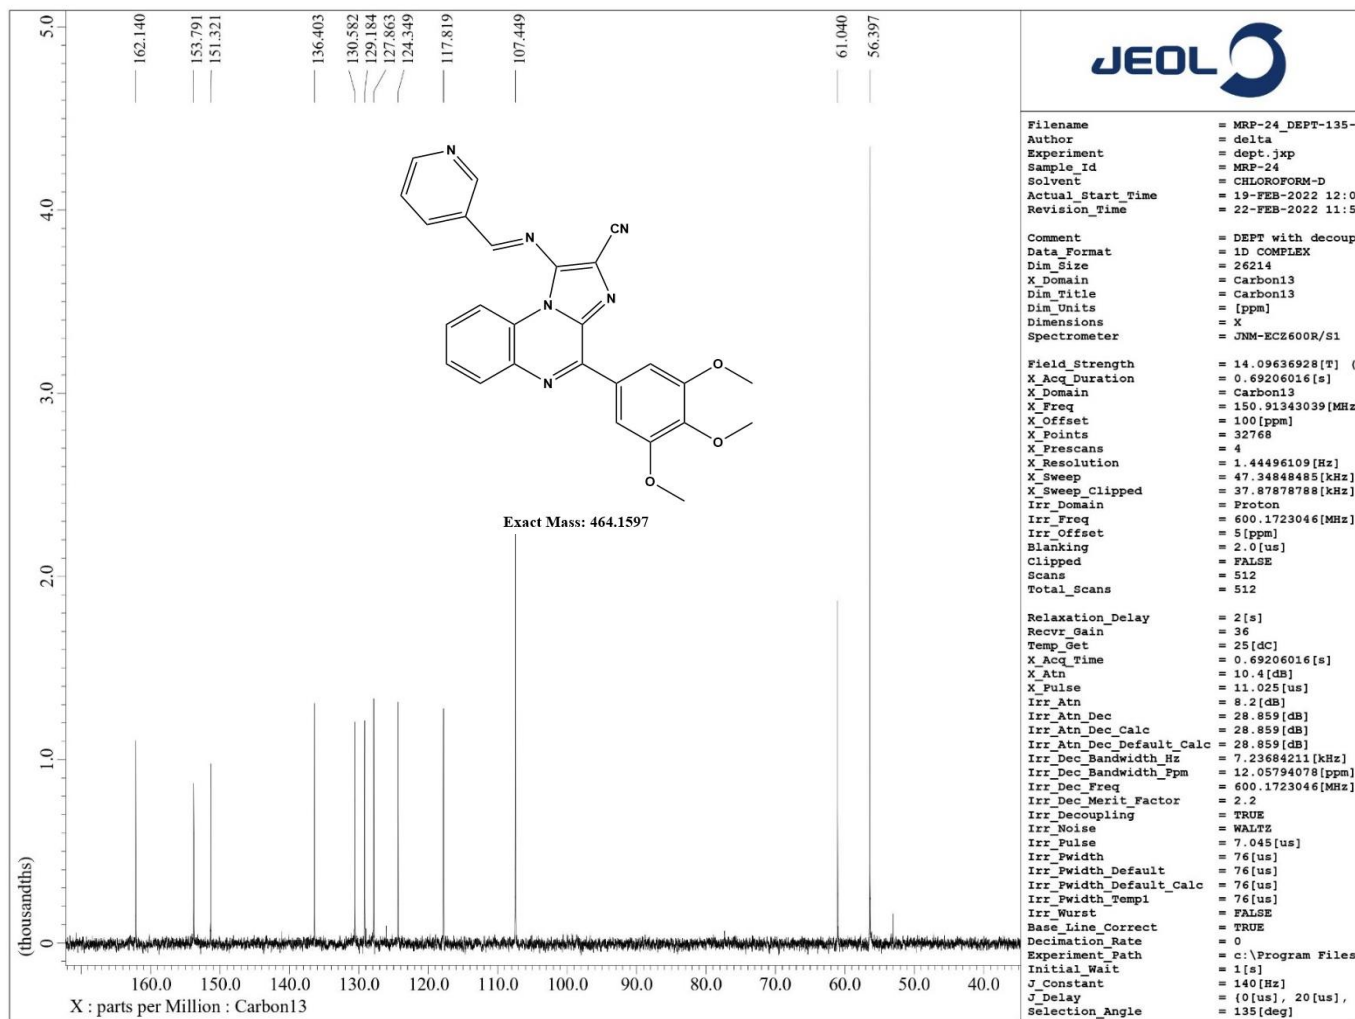

# HSQC-1

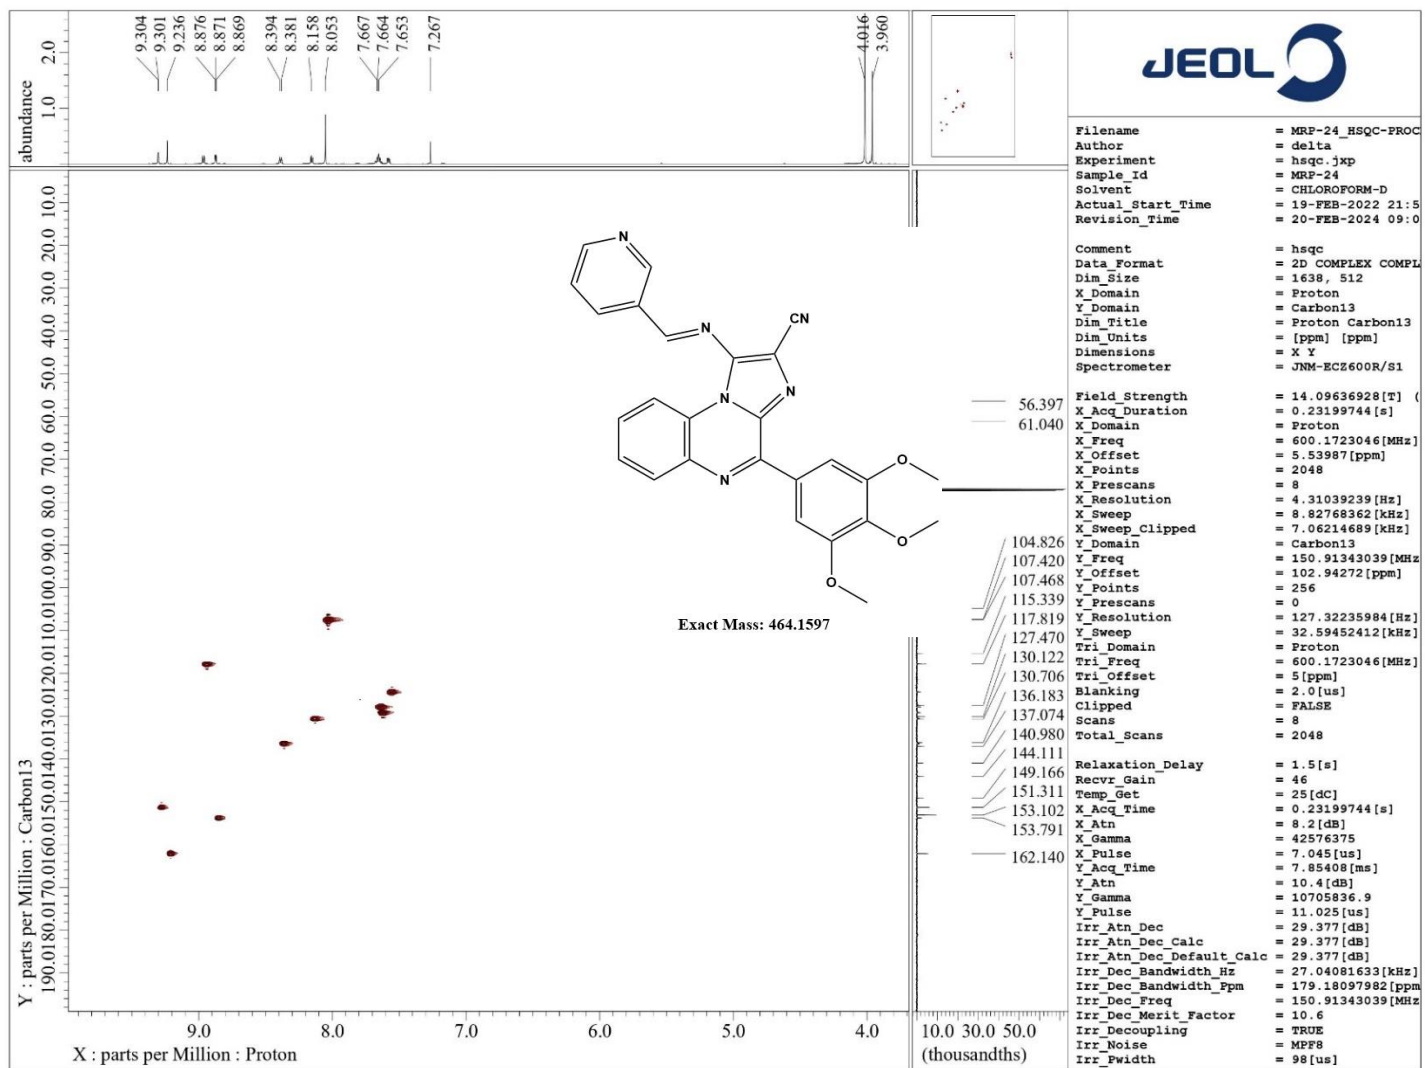

# HSQC-2

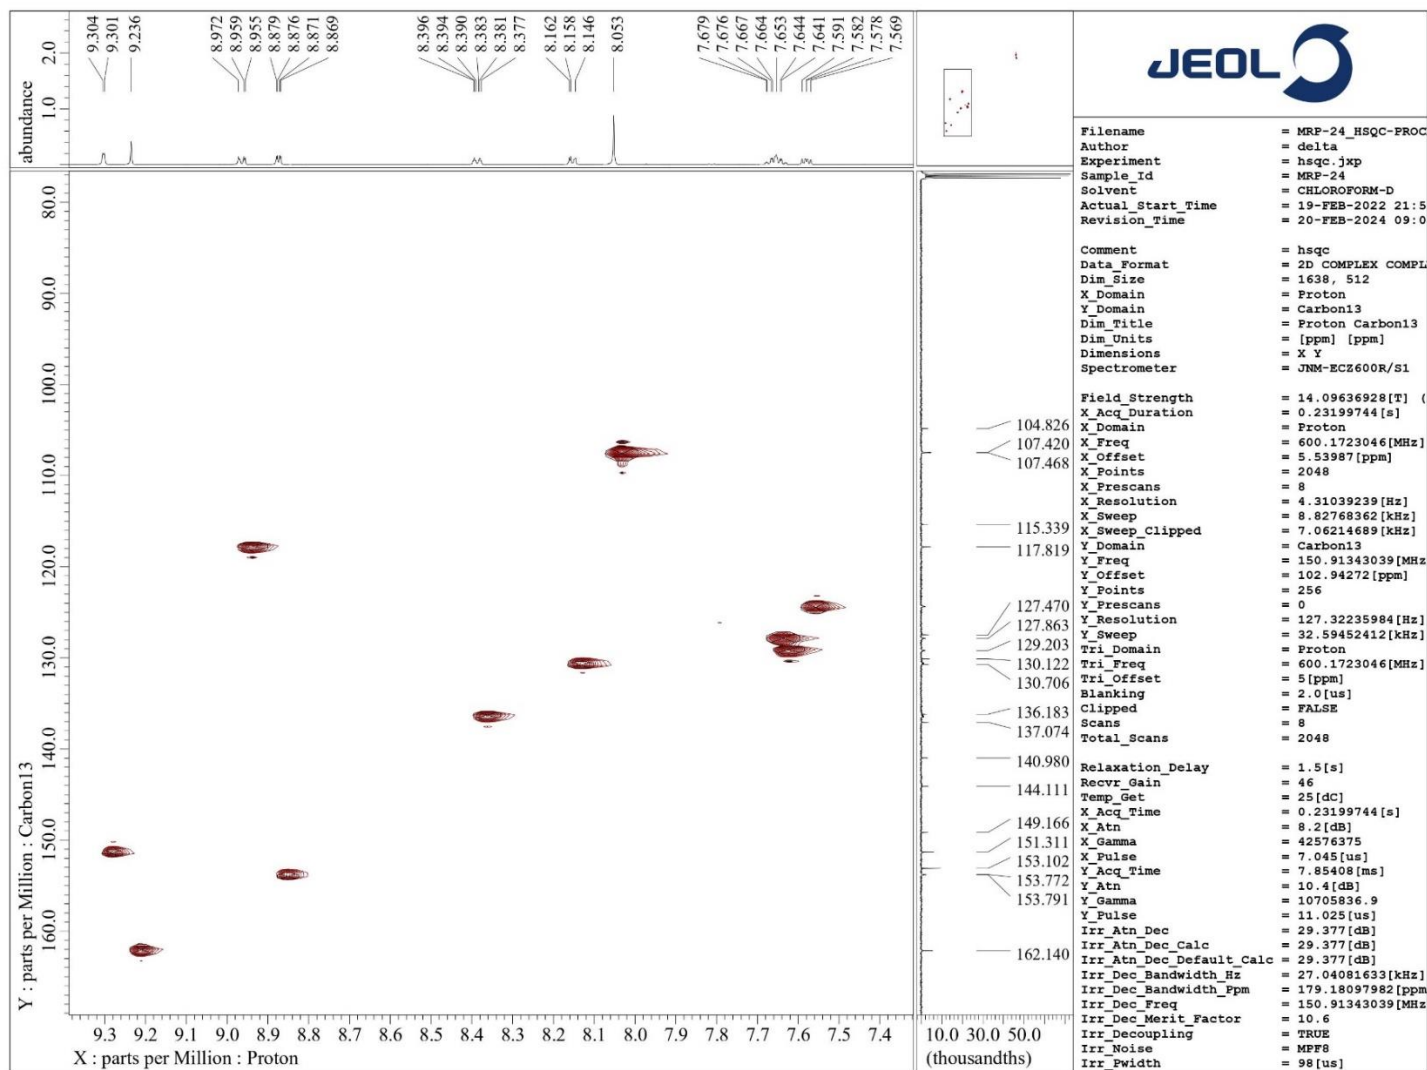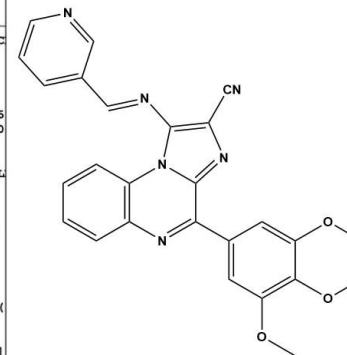

# HMBC-1

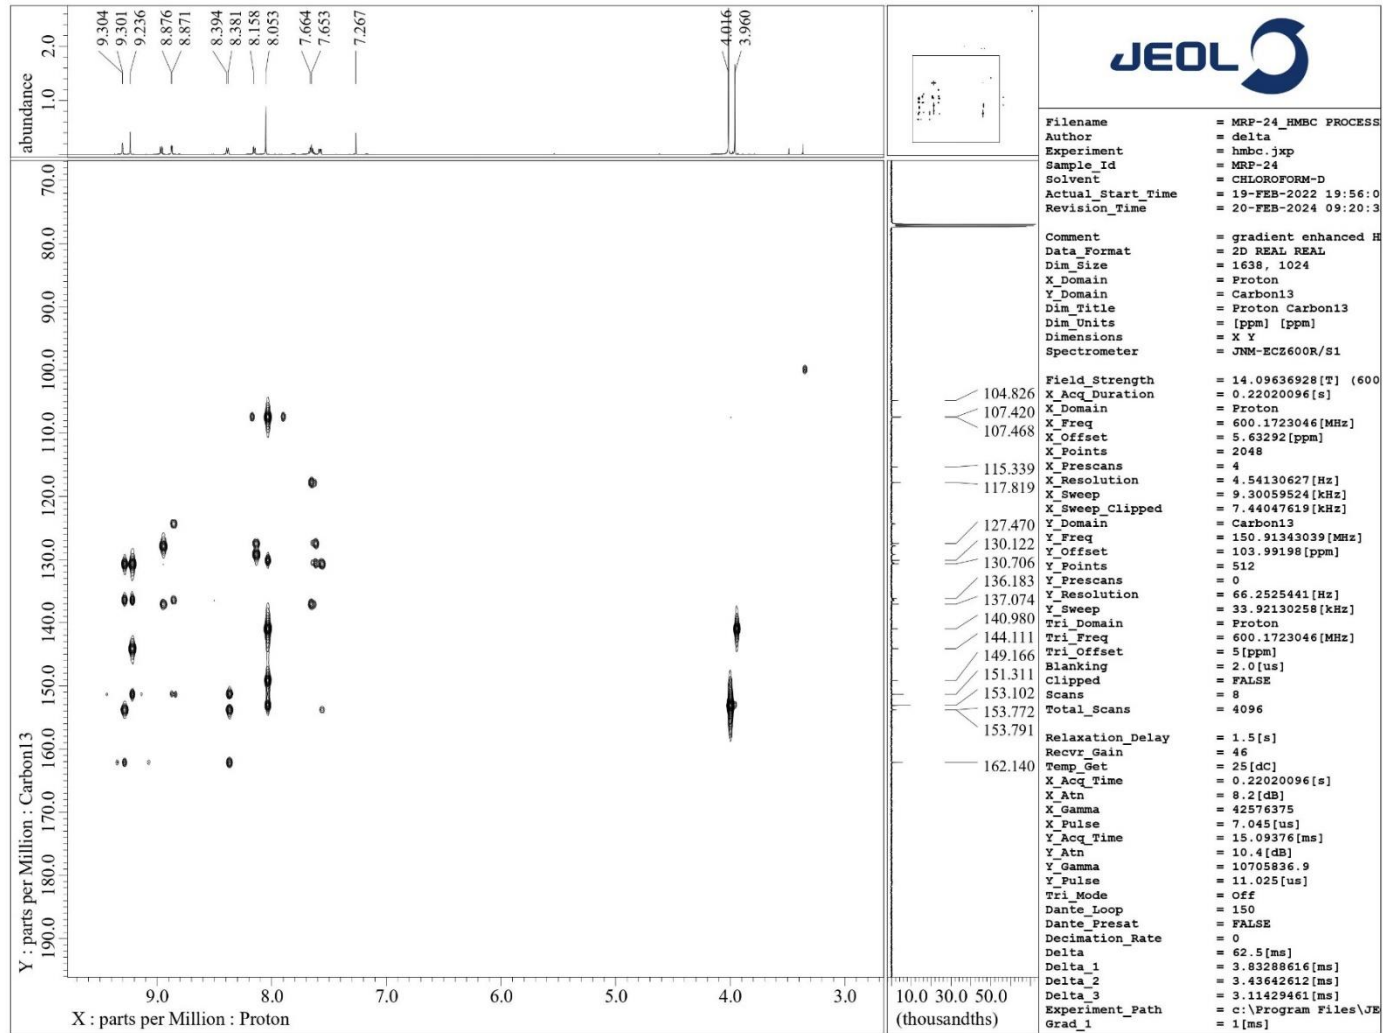

# HMBC-2

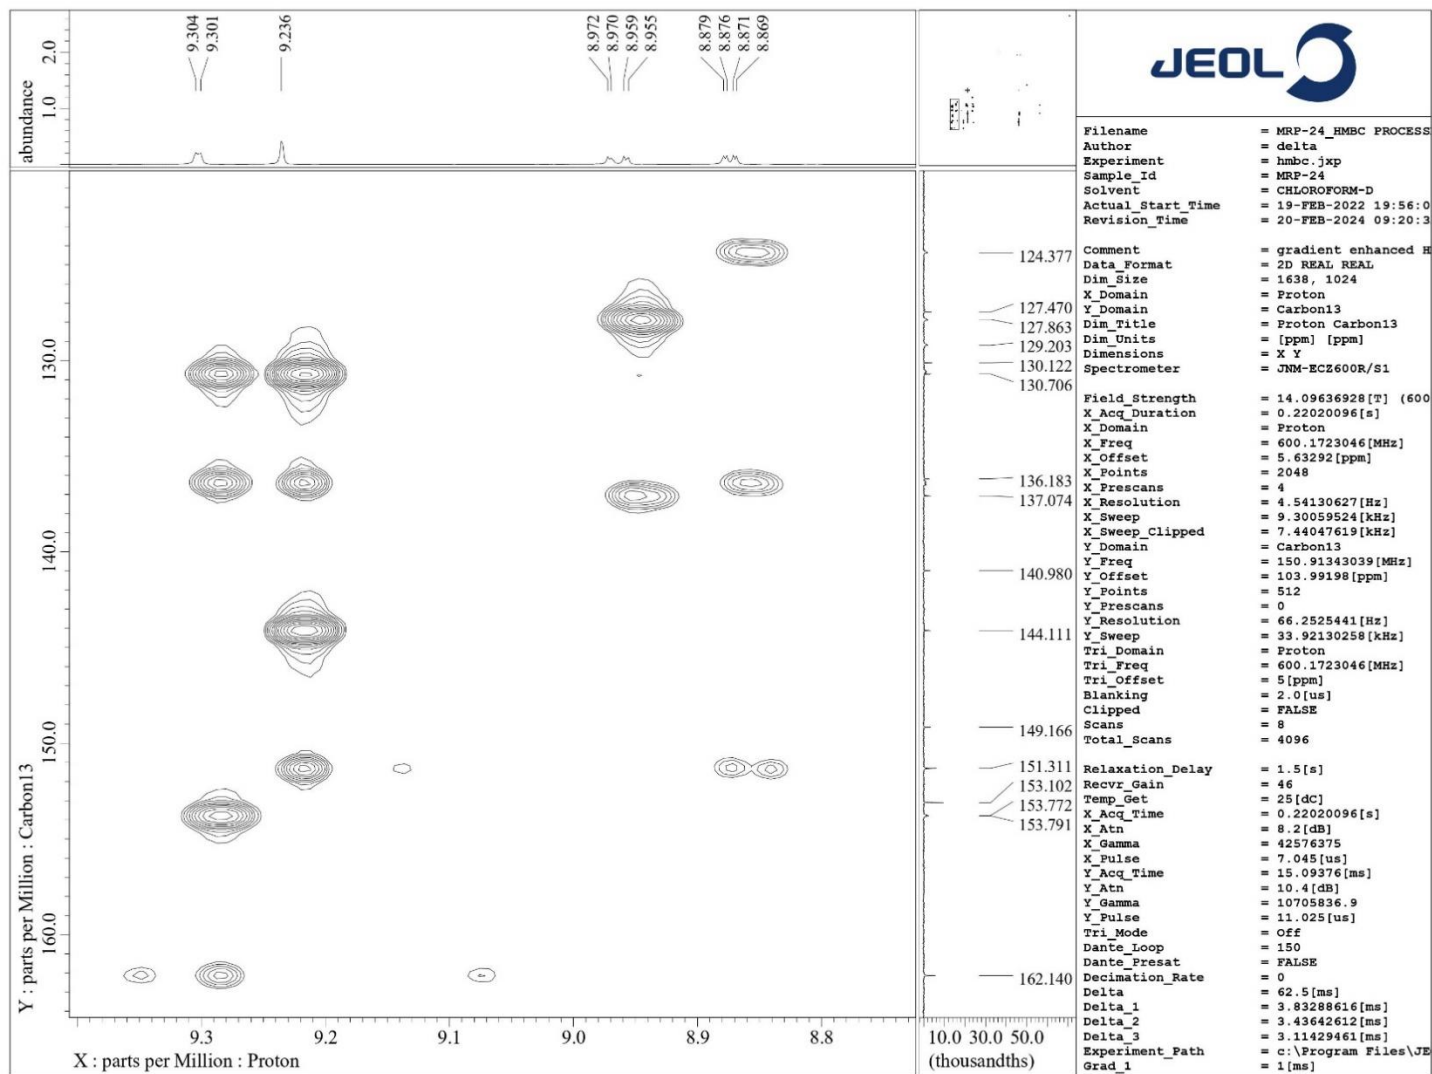



# HMBC-3

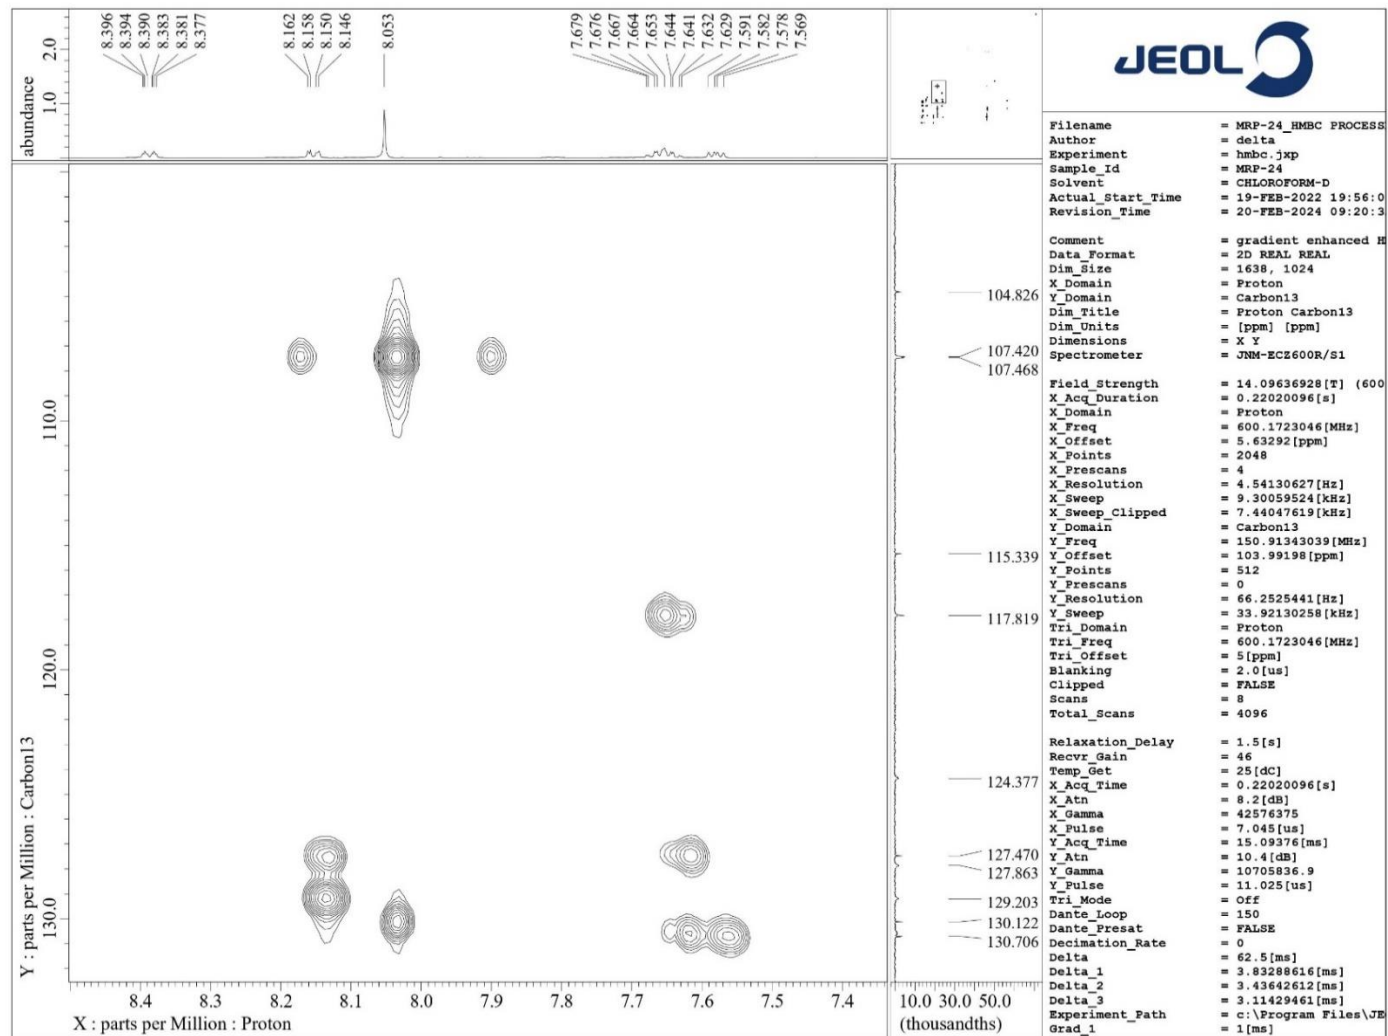

# HMBC-4

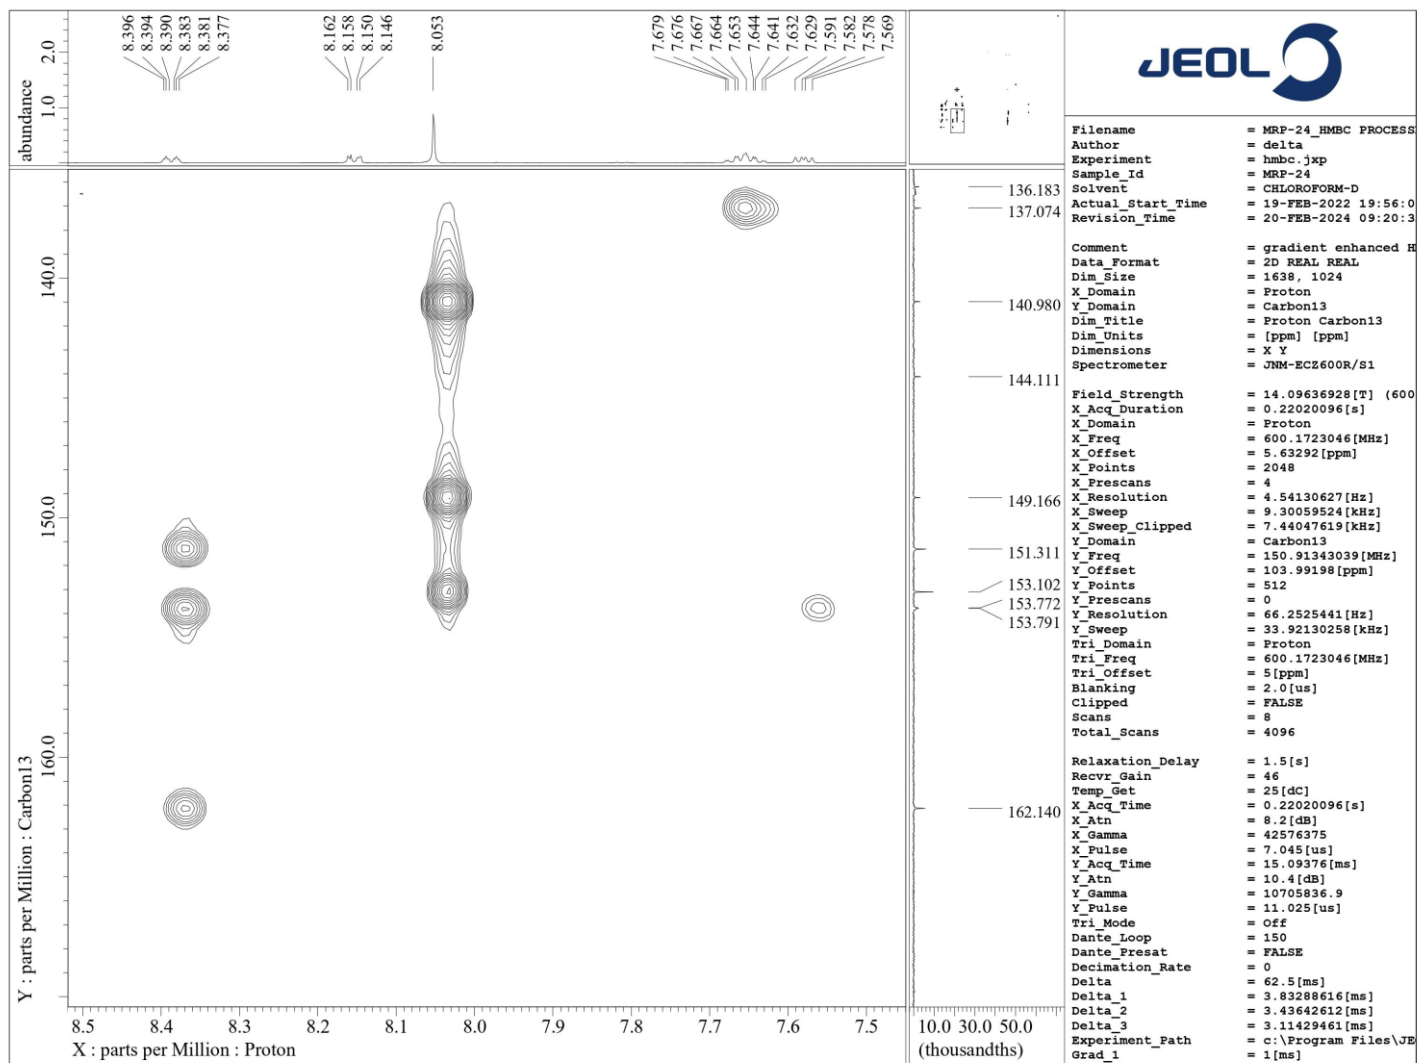



# HMBC-5

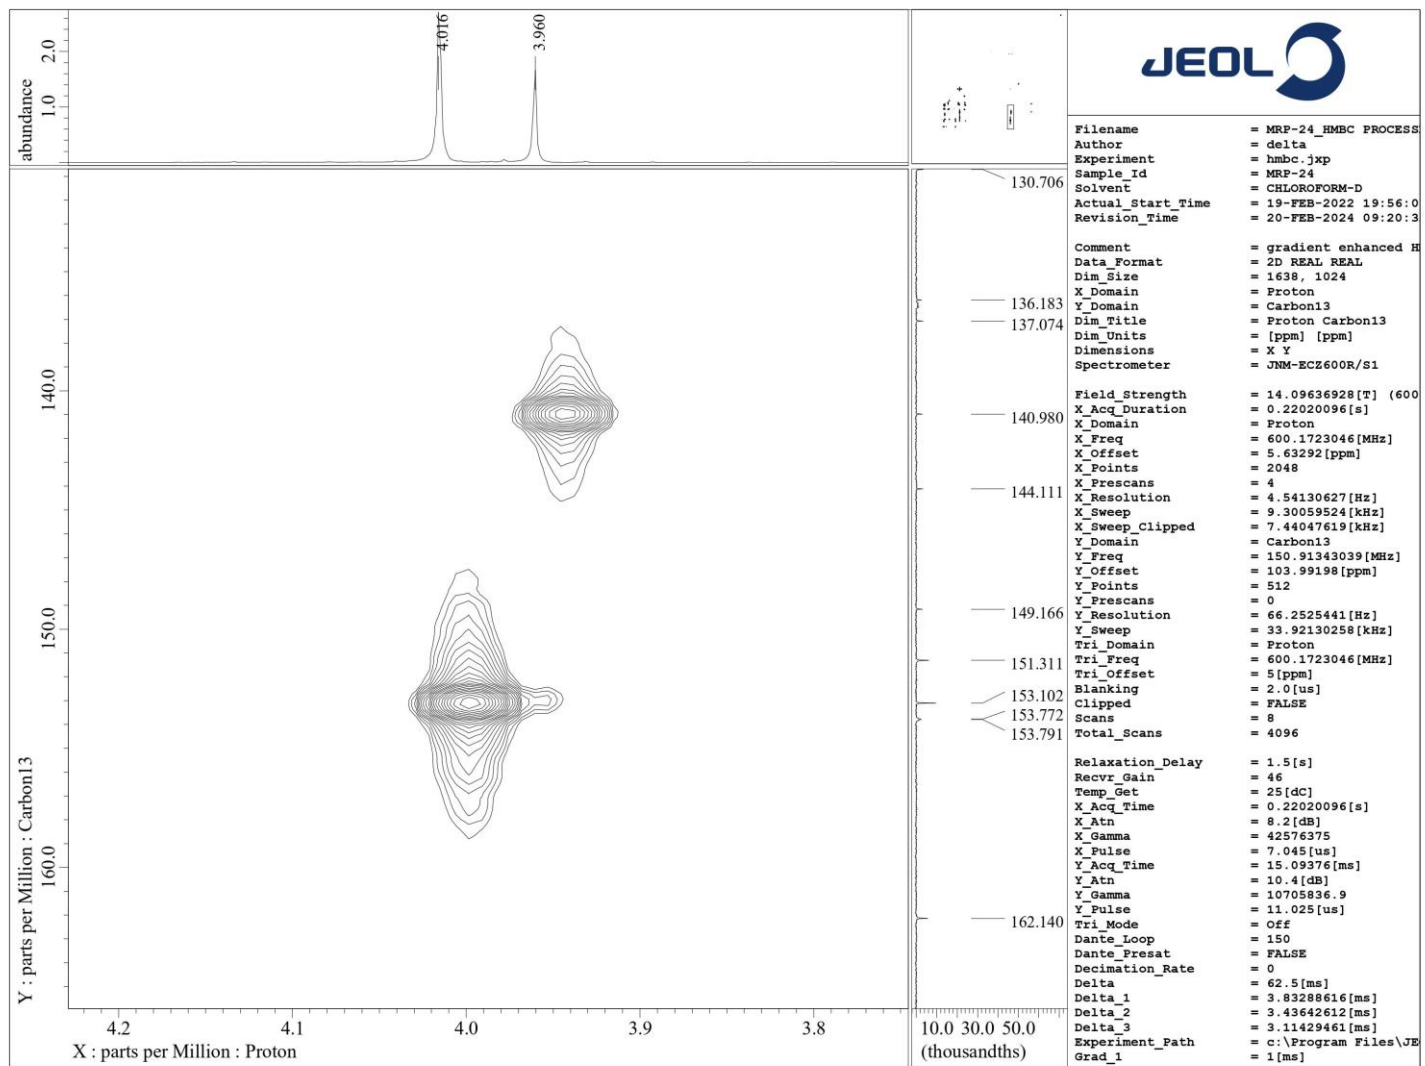

# Elemental Composition Report

## Single Mass Analysis

Tolerance = 10.0 PPM / DBE: min = -1.5, max = 50.0

Element prediction: Off

Number of isotope peaks used for i-FIT = 5

Monoisotopic Mass, Even Electron Ions

1149 formula(e) evaluated with 10 results within limits (up to 1 closest results)

Elements Used:

C: 0-50 H: 0-100 N: 5-10 O: 0-10 S: 0-3

Sample Name : MRP\_24

Test Name :

23032022\_MRP\_24 8 (0.186)

IITRPR

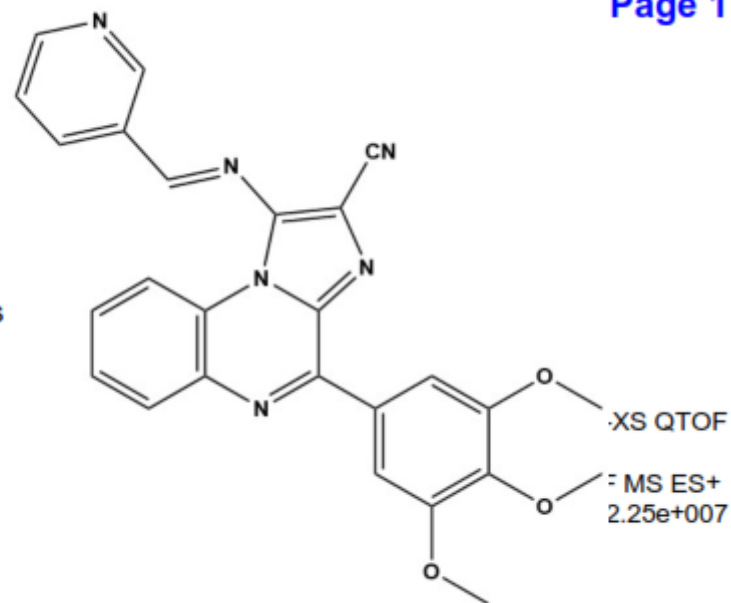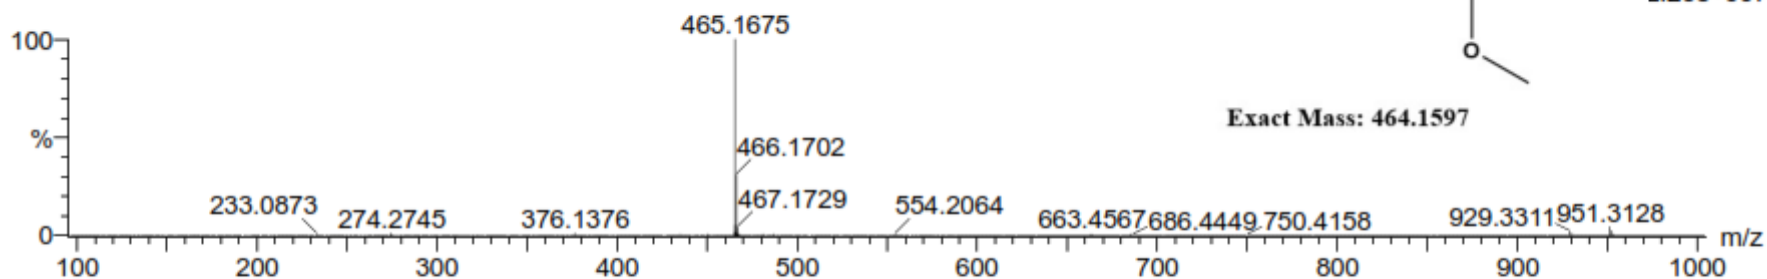

Minimum: -1.5  
Maximum: 2.0 10.0 50.0

| Mass     | Calc. Mass | mDa | PPM | DBE  | i-FIT  | Norm | Conf (%) | Formula       |
|----------|------------|-----|-----|------|--------|------|----------|---------------|
| 465.1675 | 465.1675   | 0.0 | 0.0 | 19.5 | 1051.3 | n/a  | n/a      | C26 H21 N6 O3 |

# Spectral data of compound 5p

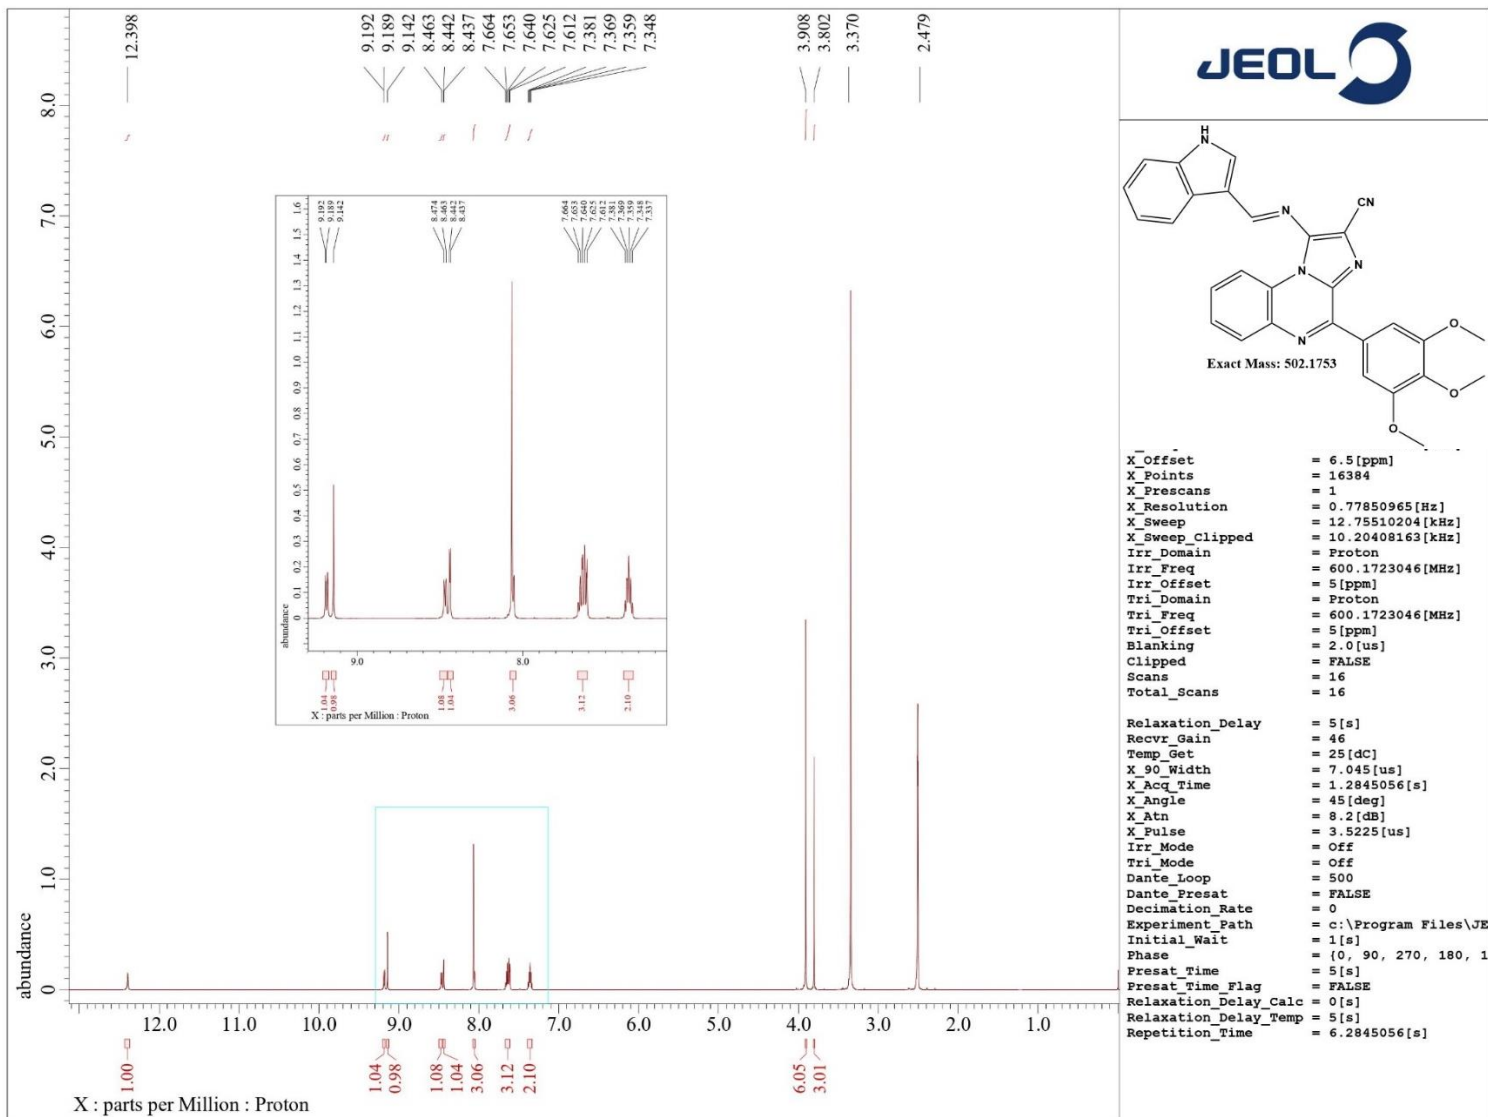

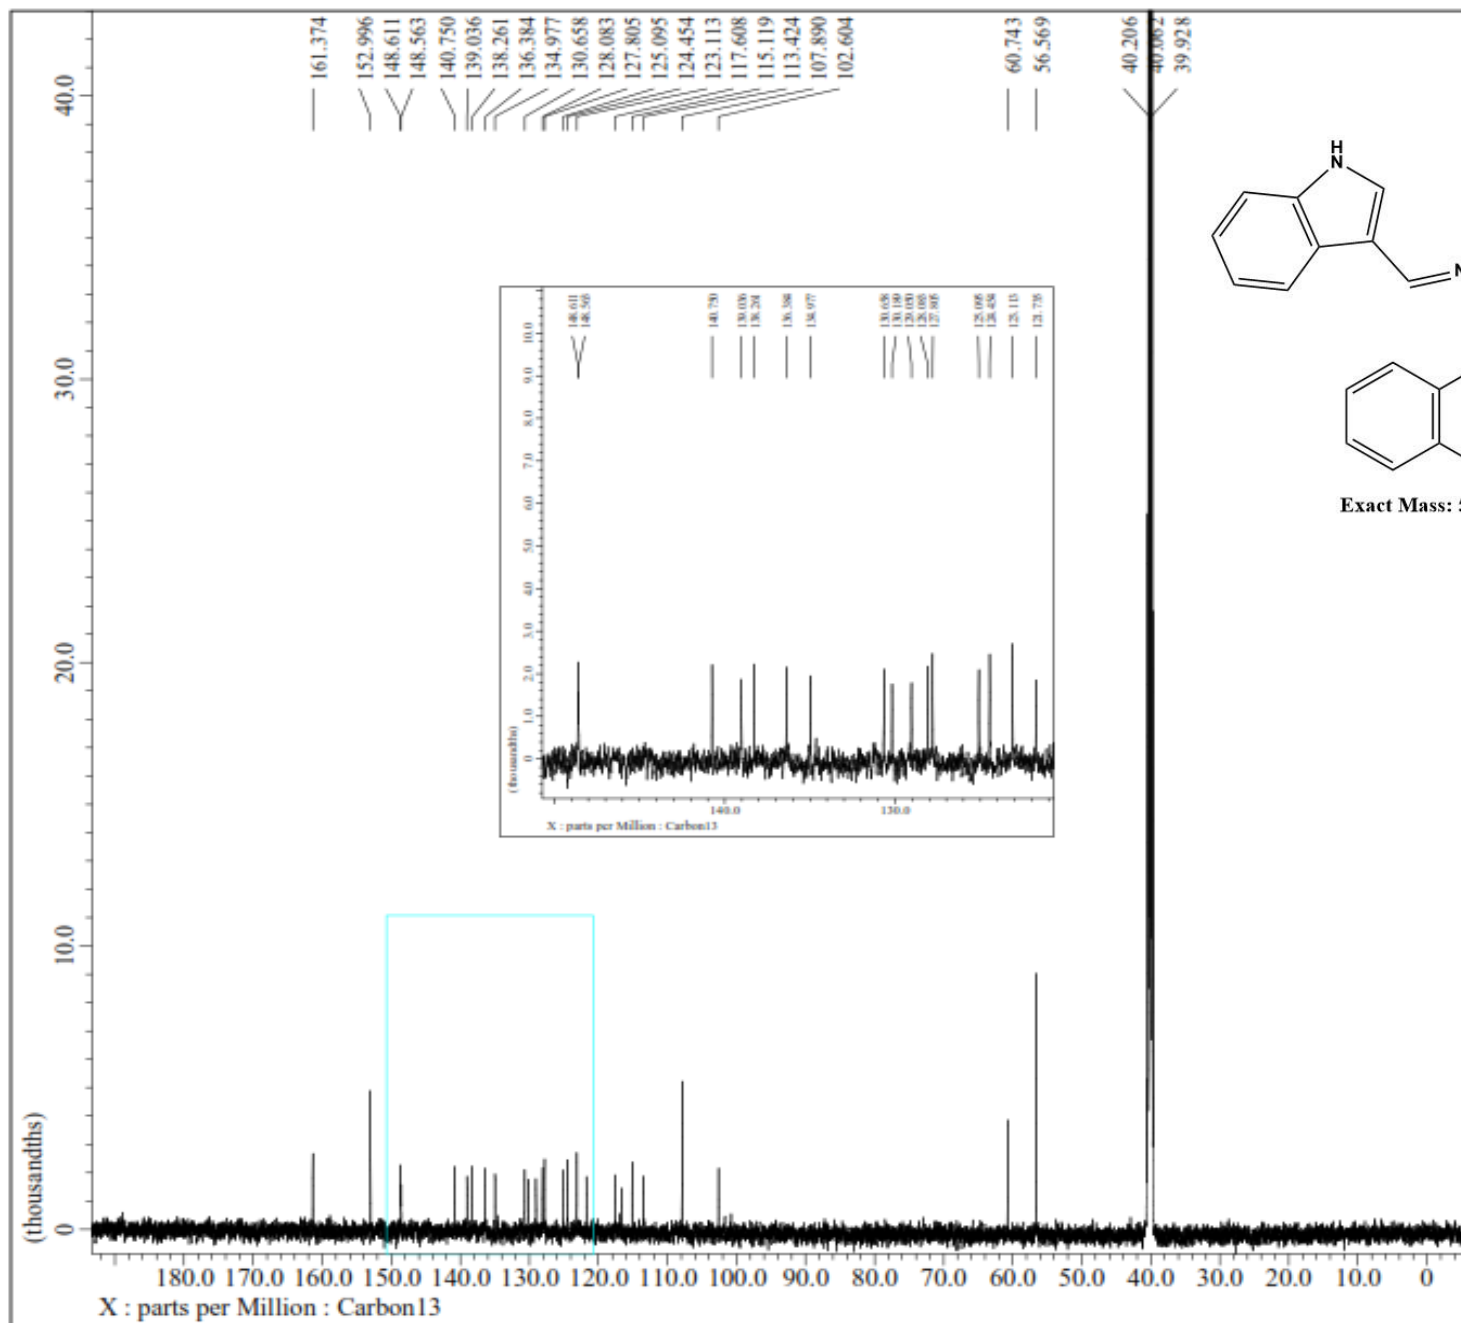

## Elemental Composition Report

### Single Mass Analysis

Tolerance = 10.0 PPM / DBE: min = -1.5, max = 50.0

Element prediction: Off

Number of isotope peaks used for i-FIT = 5

Monoisotopic Mass, Even Electron Ions

1268 formula(e) evaluated with 12 results within limits (up to 1 closest result)

Elements Used:

C: 0-50 H: 0-100 N: 5-10 O: 0-10 S: 0-3

Sample Name : MRP\_23

Test Name :

23032022\_MRP\_26 8 (0.186)

IITRPR

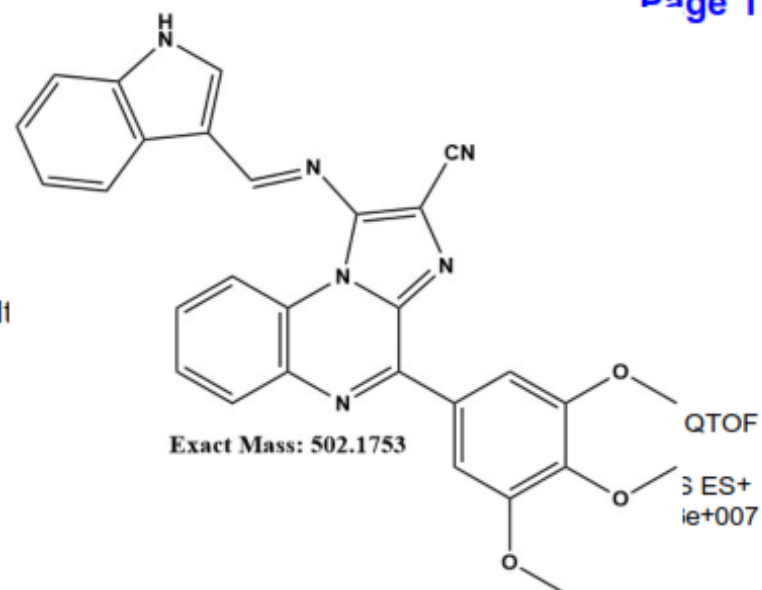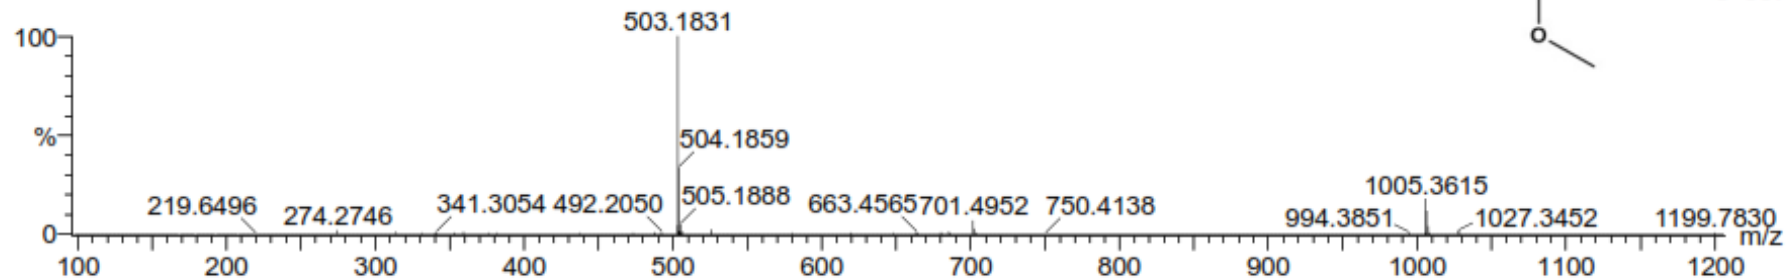

Minimum: -1.5  
Maximum: 2.0 10.0 50.0

| Mass     | Calc. Mass | mDa  | PPM  | DBE  | i-FIT  | Norm | Conf(%) | Formula                                                       |
|----------|------------|------|------|------|--------|------|---------|---------------------------------------------------------------|
| 503.1831 | 503.1832   | -0.1 | -0.2 | 21.5 | 1153.5 | n/a  | n/a     | C <sub>29</sub> H <sub>23</sub> N <sub>6</sub> O <sub>3</sub> |

# Spectral data of compound 5q

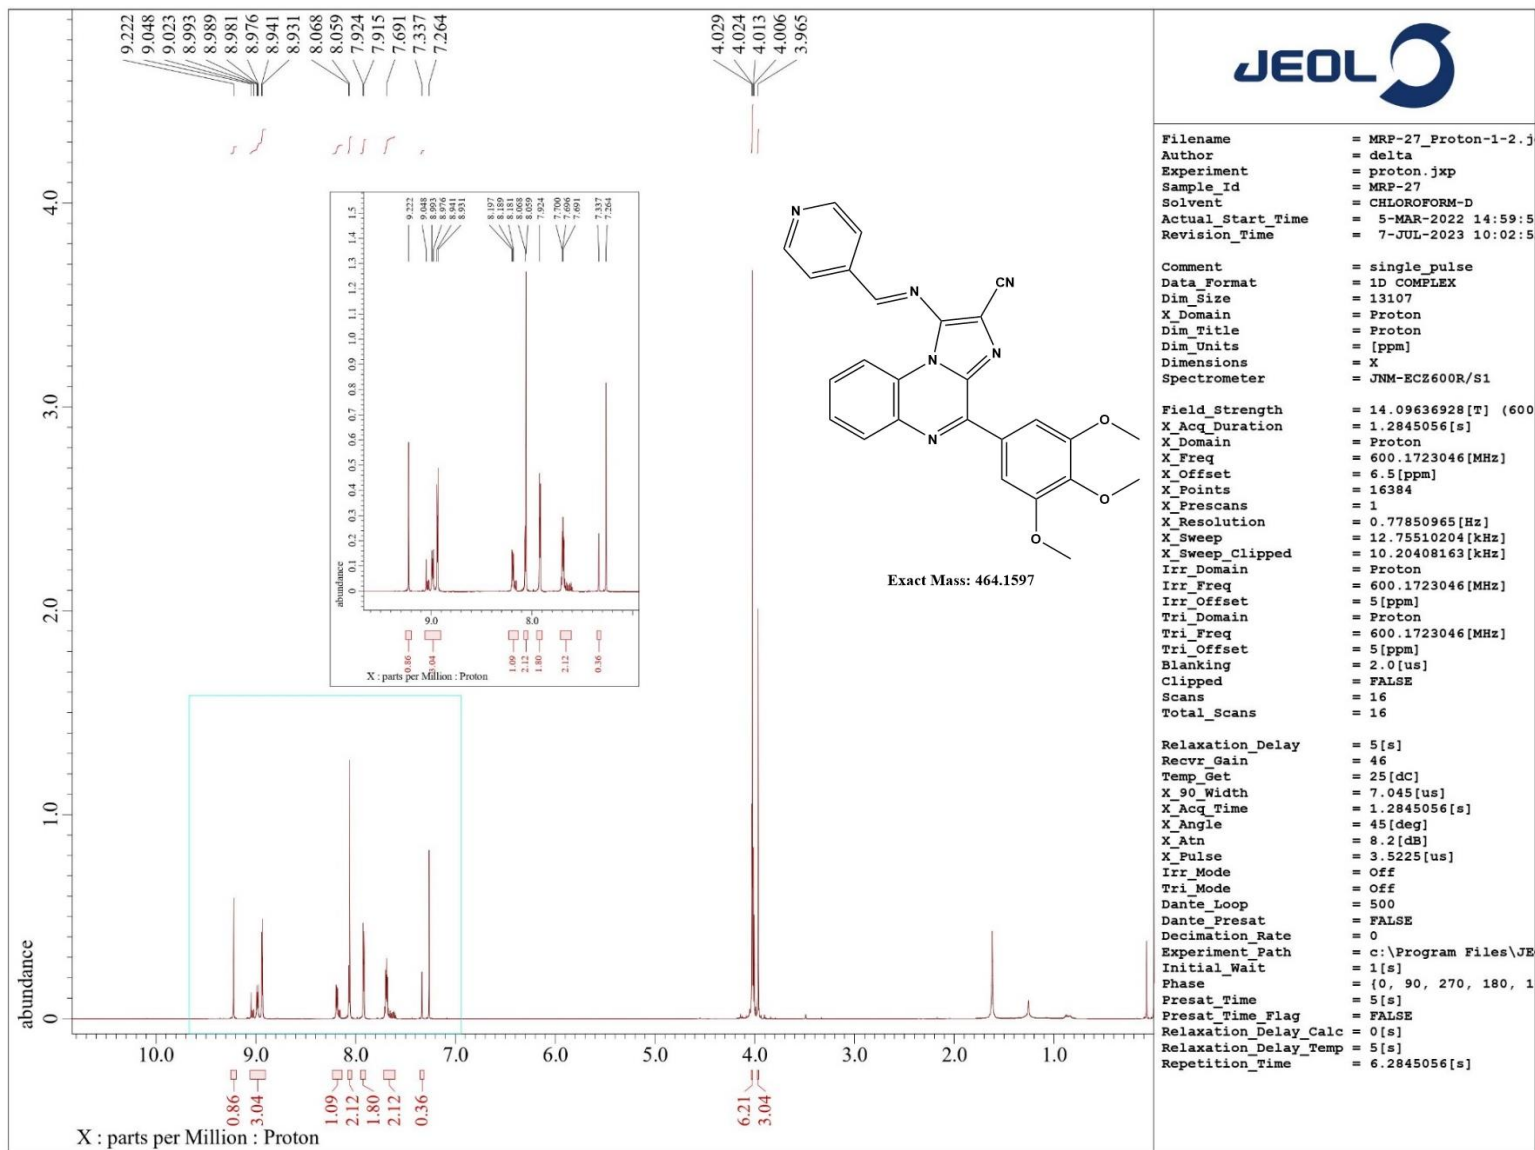

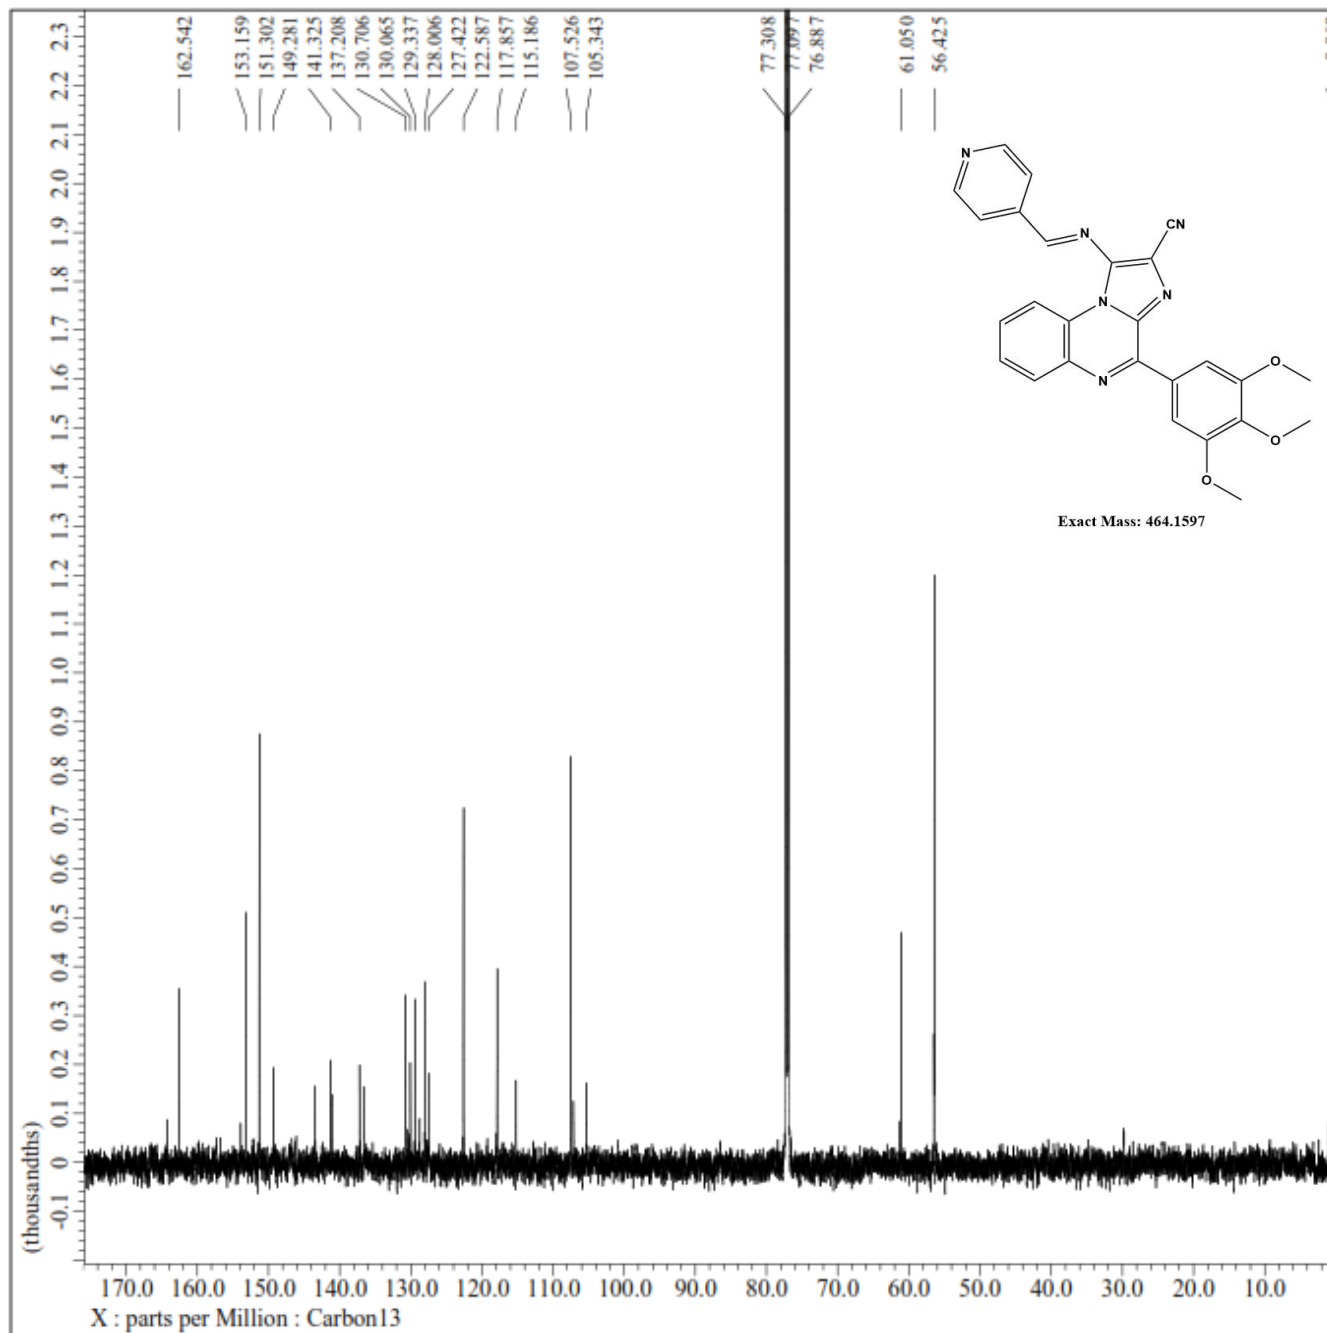



## Elemental Composition Report

### Single Mass Analysis

Tolerance = 5.0 PPM / DBE: min = -1.5, max = 50.0

Element prediction: Off

Number of isotope peaks used for i-FIT = 5

Monoisotopic Mass, Even Electron Ions

1430 formula(e) evaluated with 7 results within limits (up to 1 closest results for each r

Elements Used:

C: 1-60 H: 1-100 N: 0-10 O: 0-10 Br: 0-2

Sample Name : MRP\_27

Test Name :

260522\_MRP\_27 17 (0.197)

IITRPR

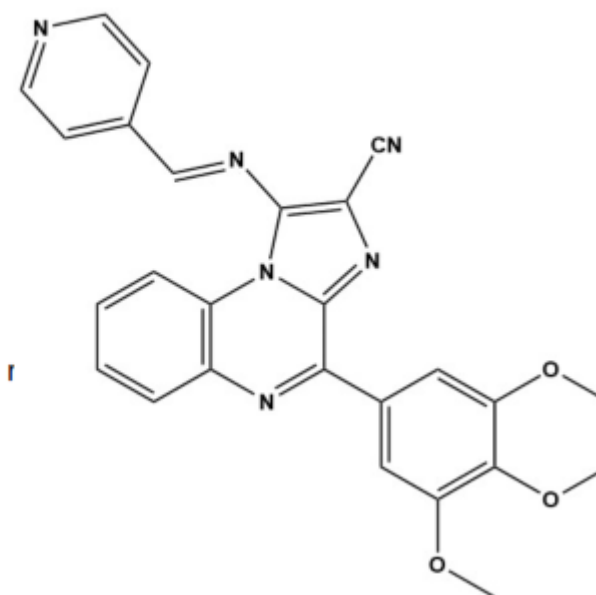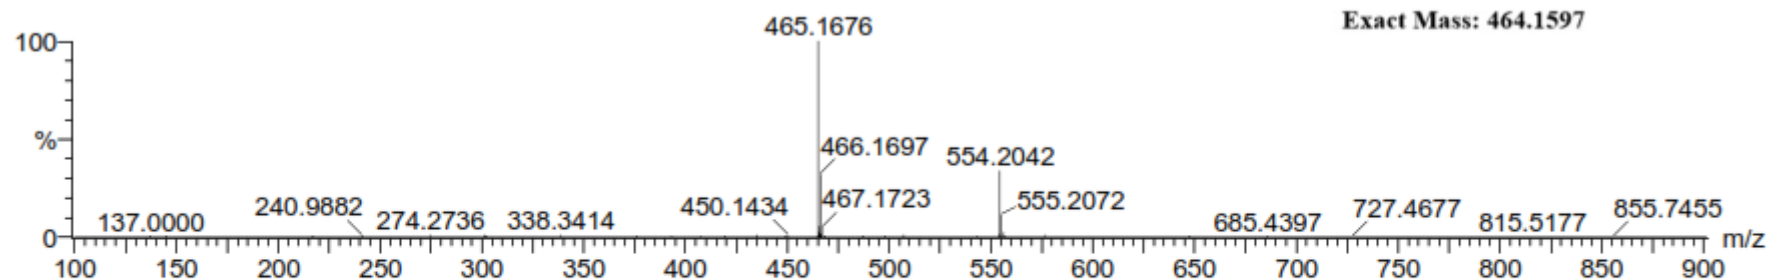

Minimum: -1.5

Maximum: 2.0 5.0 50.0

| Mass     | Calc. Mass | mDa | PPM | DBE  | i-FIT  | Norm | Conf (%) | Formula       |
|----------|------------|-----|-----|------|--------|------|----------|---------------|
| 465.1676 | 465.1675   | 0.1 | 0.2 | 19.5 | 1354.9 | n/a  | n/a      | C26 H21 N6 O3 |



# Spectral data of compound 5r

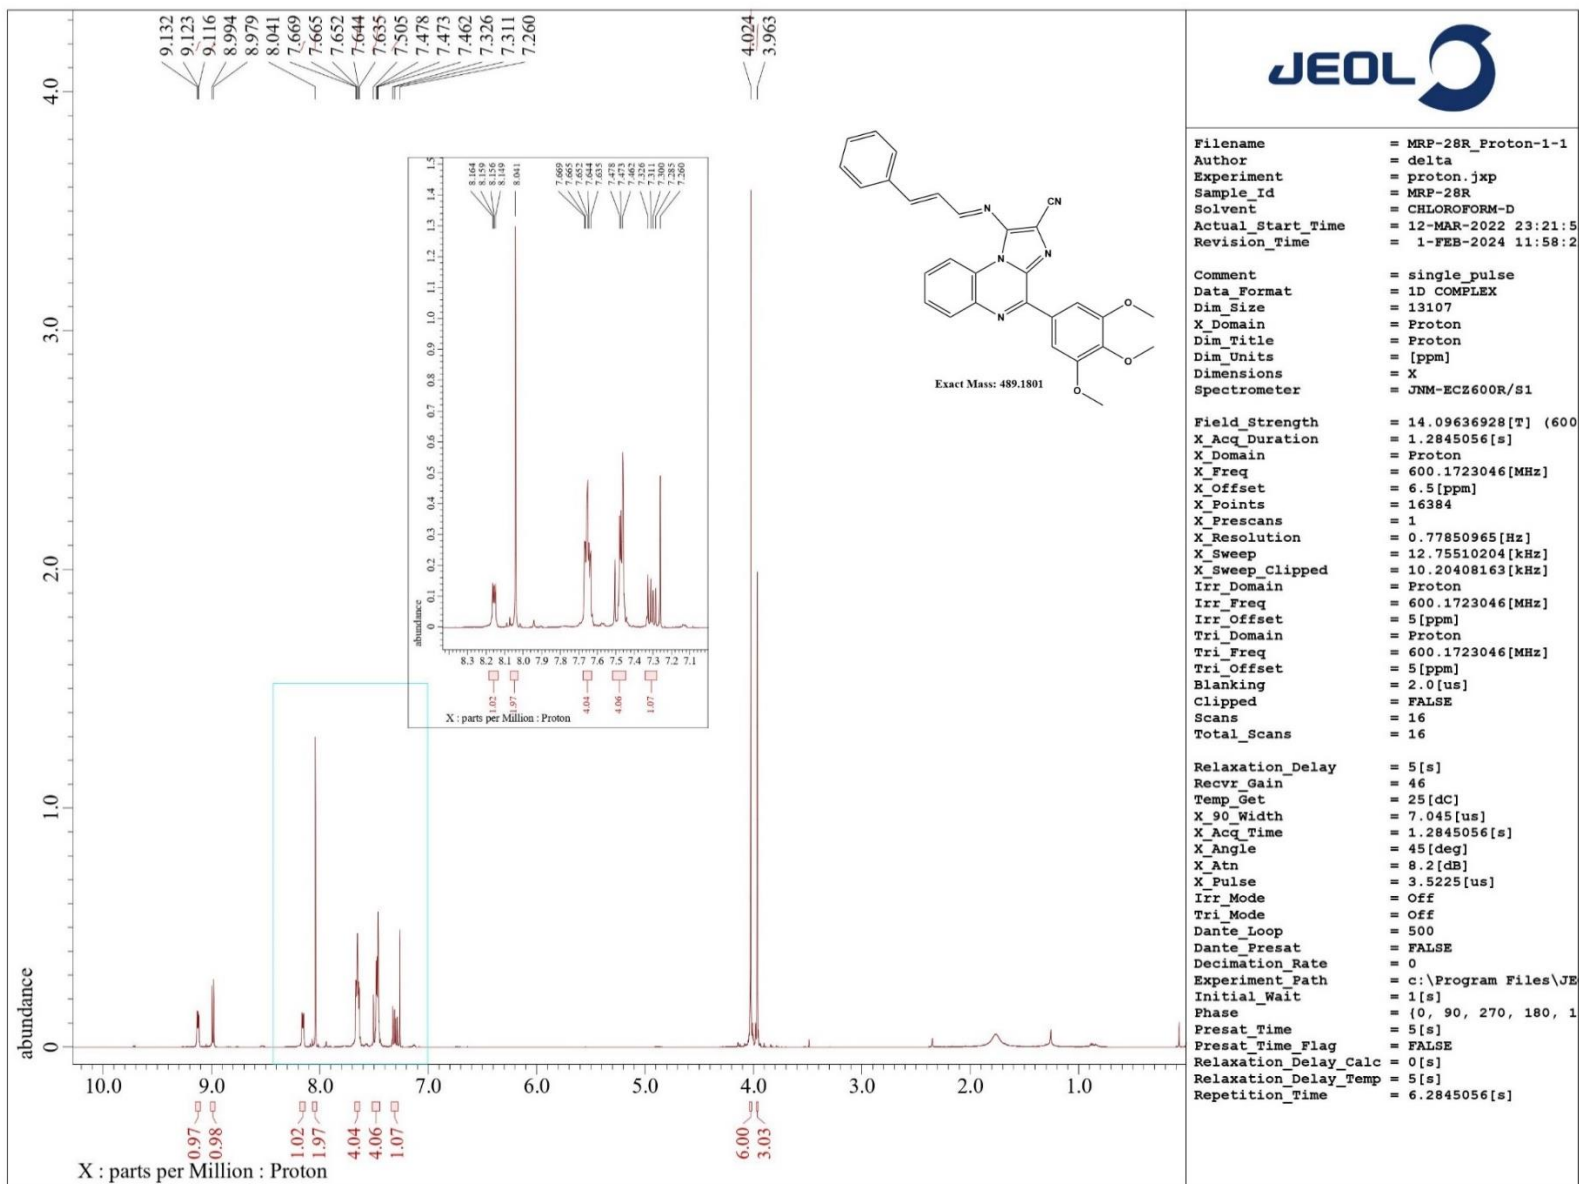

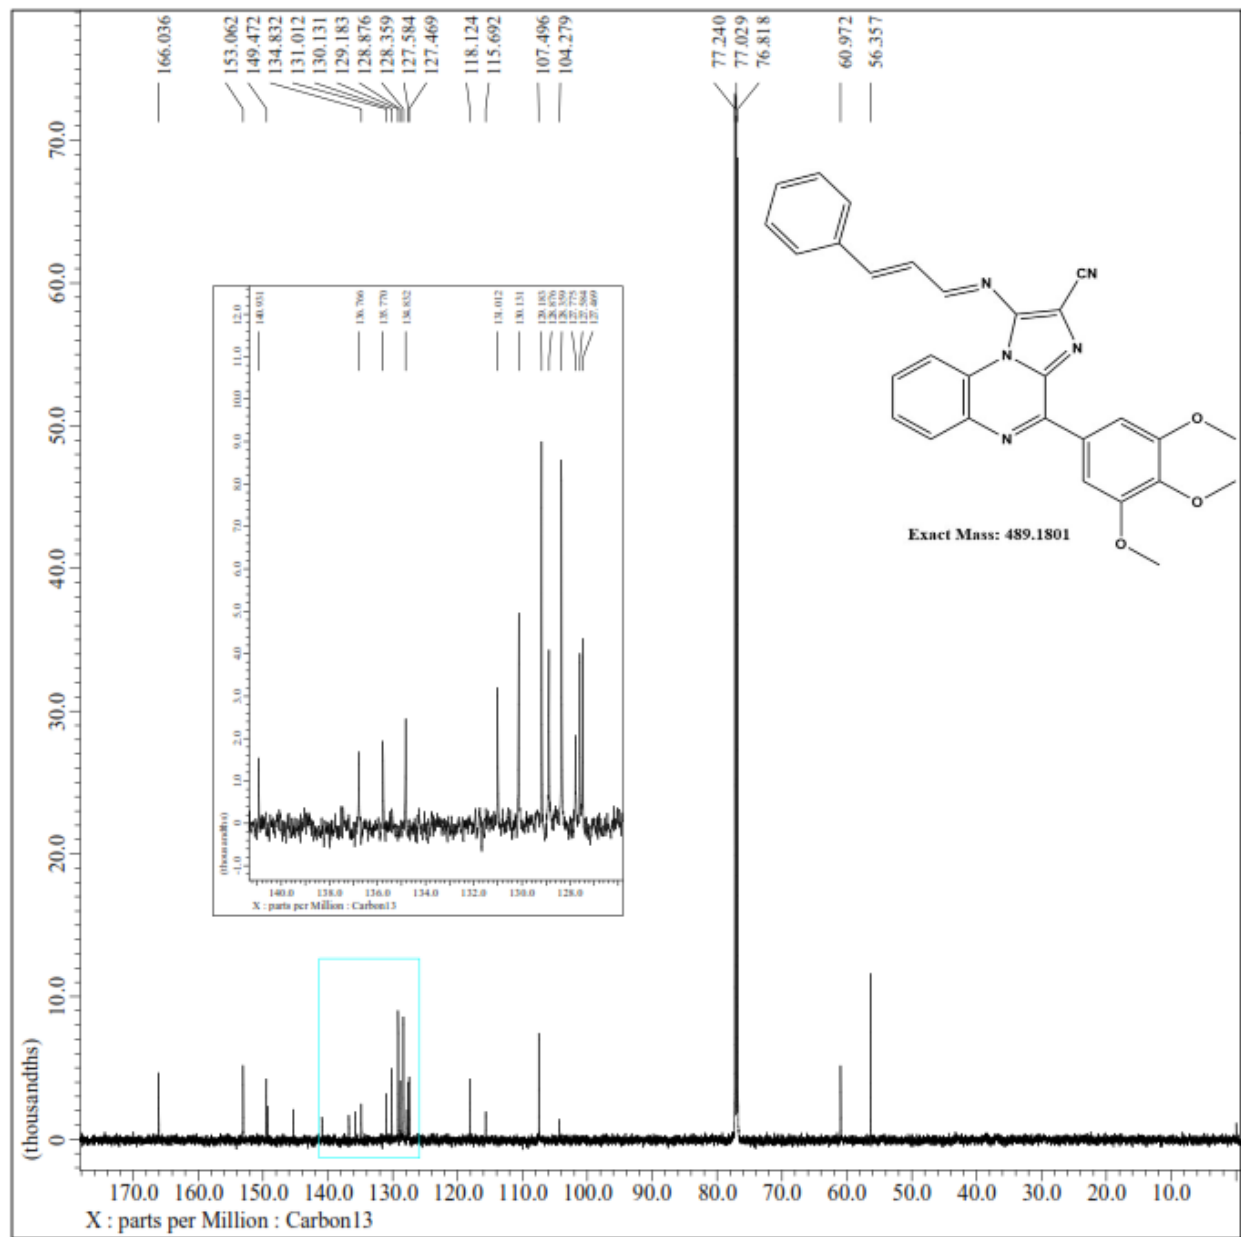

## Elemental Composition Report

### Single Mass Analysis

Tolerance = 10.0 PPM / DBE: min = -1.5, max = 50.0

Element prediction: Off

Number of isotope peaks used for i-FIT = 5

Monoisotopic Mass, Even Electron Ions

1206 formula(e) evaluated with 11 results within limits (up to 1 closest results for ea

Elements Used:

C: 0-50 H: 0-100 N: 5-10 O: 0-10 S: 0-3

Sample Name : MRP\_26

Test Name :

23032022\_MRP\_28 8 (0.186)

IITRPR

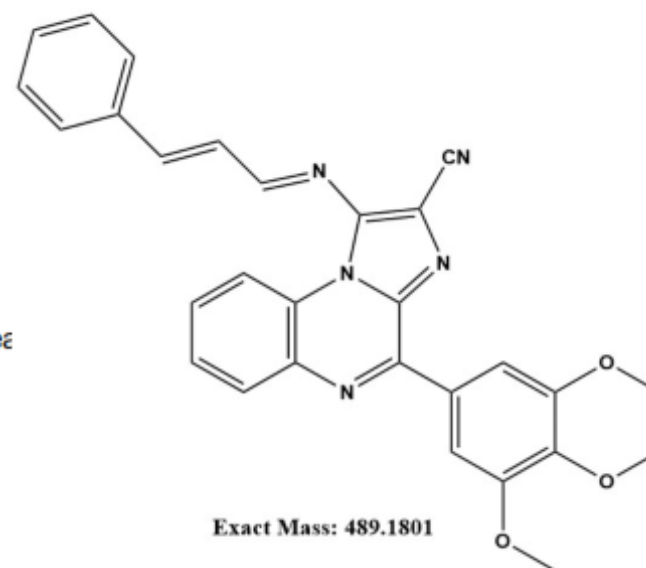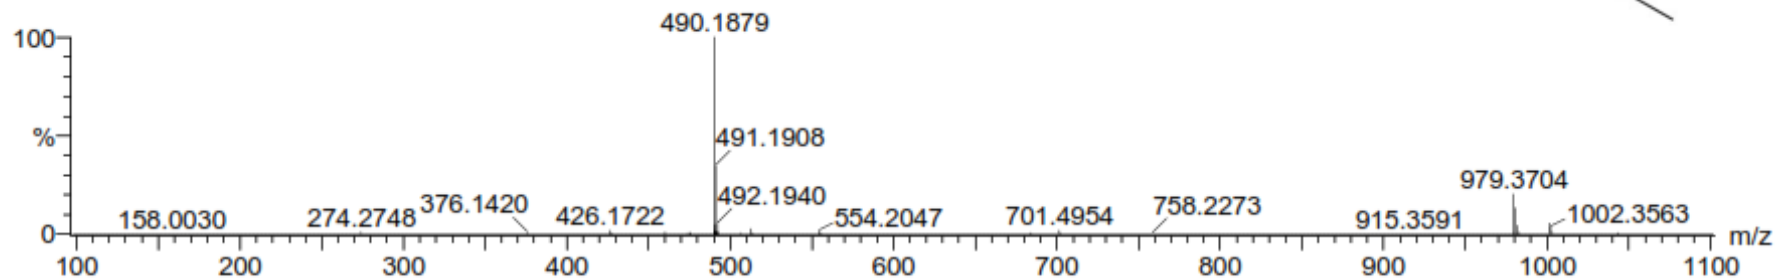

Minimum: -1.5

Maximum: 2.0 10.0 50.0

| Mass     | Calc. Mass | mDa | PPM | DBE  | i-FIT  | Norm | Conf(%) | Formula       |
|----------|------------|-----|-----|------|--------|------|---------|---------------|
| 490.1879 | 490.1879   | 0.0 | 0.0 | 20.5 | 1461.4 | n/a  | n/a     | C29 H24 N5 O3 |

# Spectral data of compound 5s

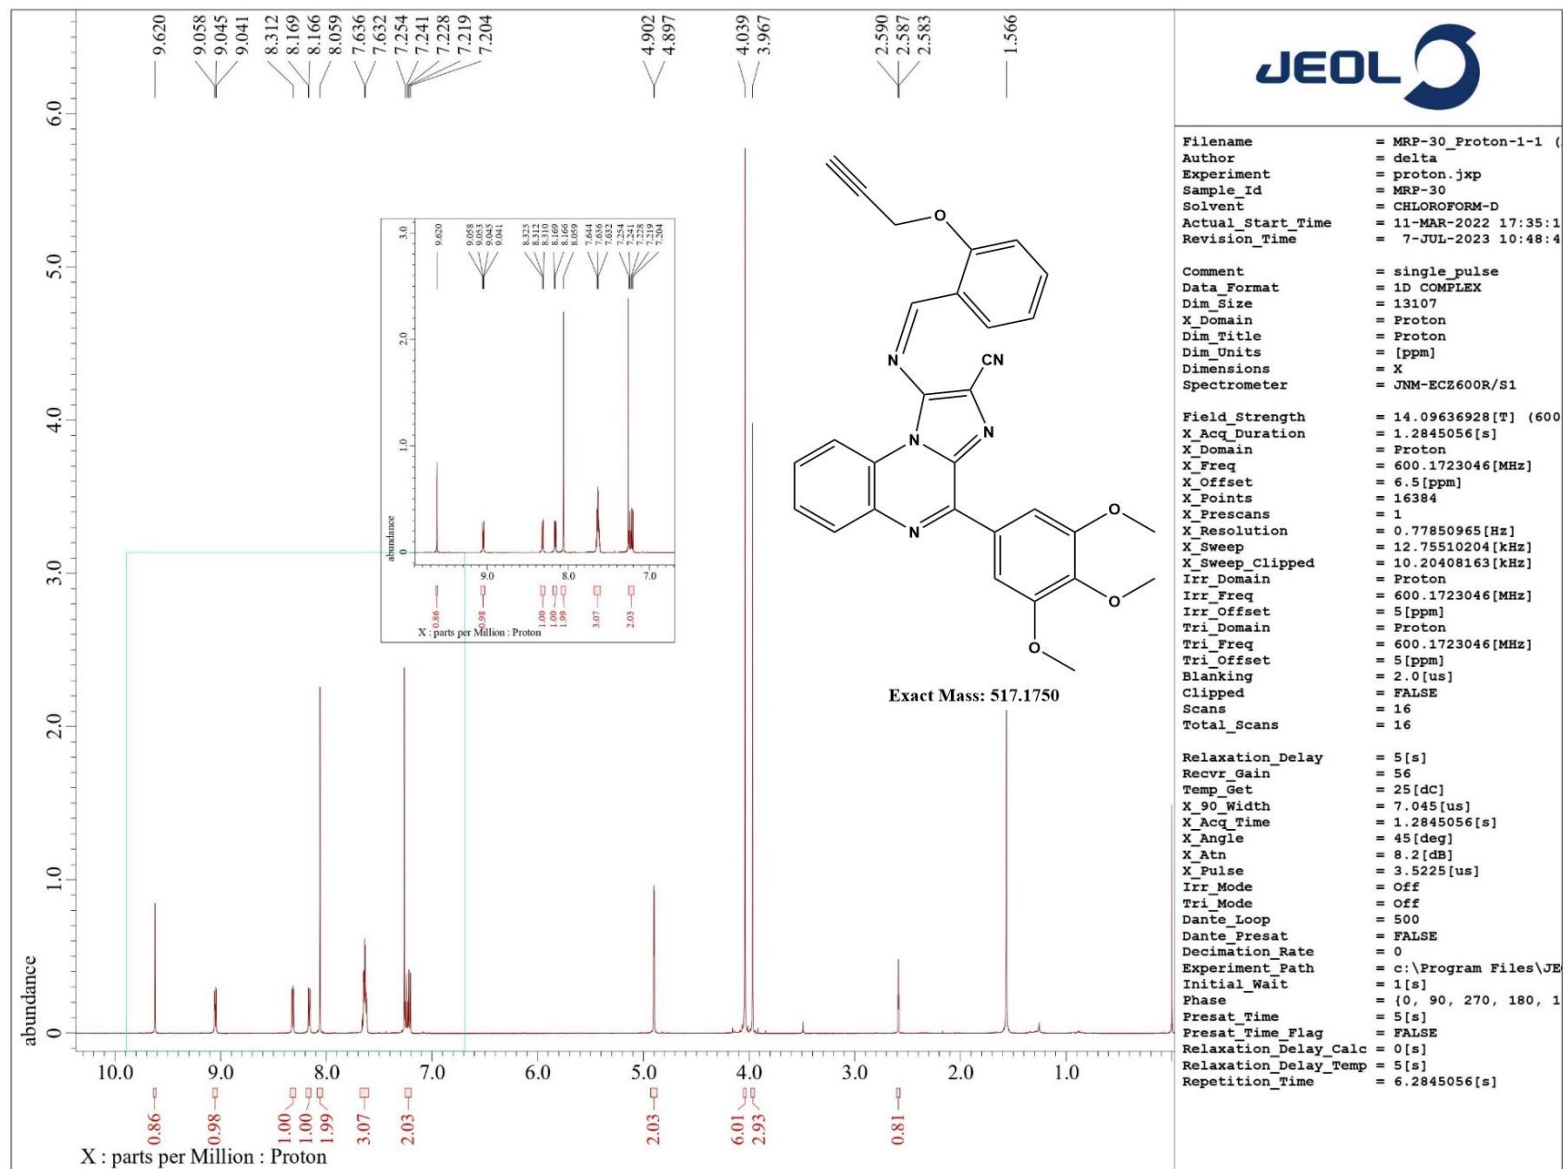

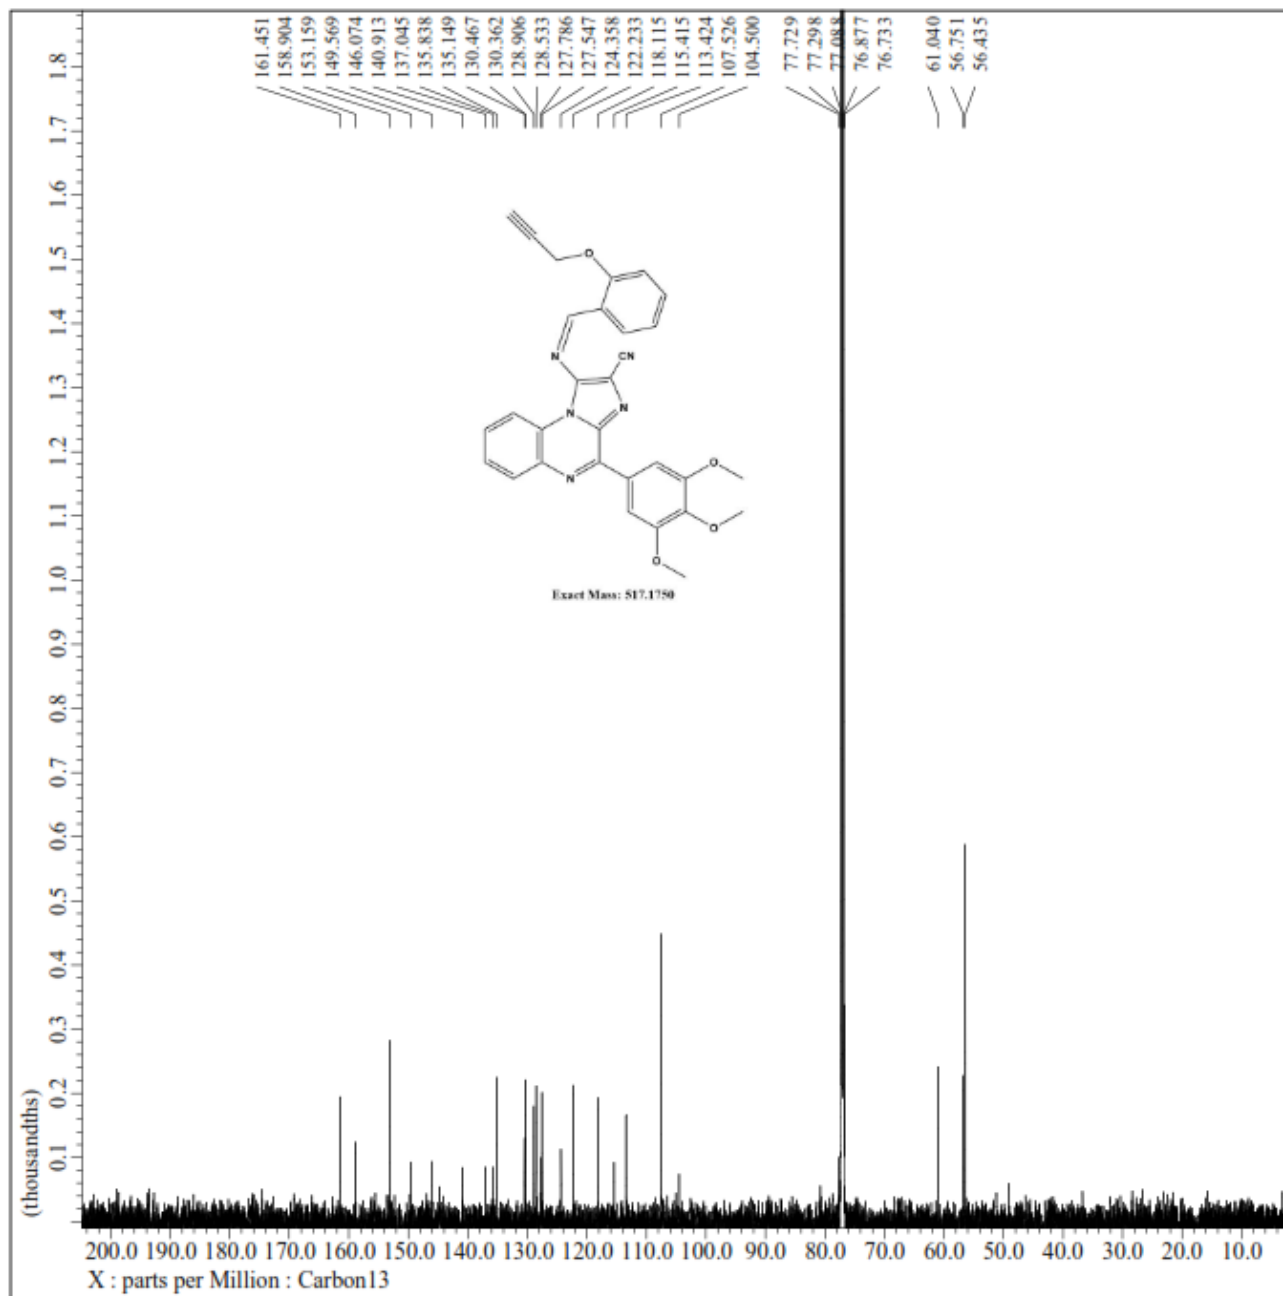

# Elemental Composition Report

ge 1

## Single Mass Analysis

Tolerance = 5.0 PPM / DBE: min = -1.5, max = 50.0

Element prediction: Off

Number of isotope peaks used for i-FIT = 5

Monoisotopic Mass, Even Electron Ions

673 formula(e) evaluated with 3 results within limits (up to 1 closest results for each mass)

Elements Used:

C: 1-60 H: 1-100 N: 0-10 O: 0-10

Sample Name : MRP\_30

Test Name :

260522\_MRP\_30 17 (0.197)

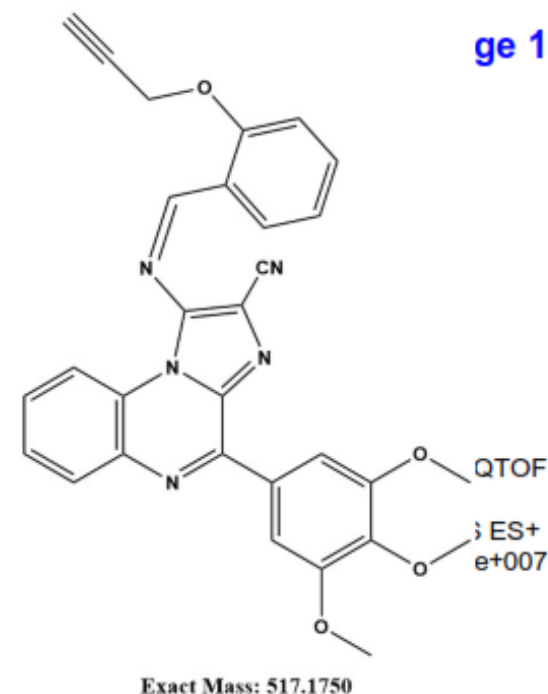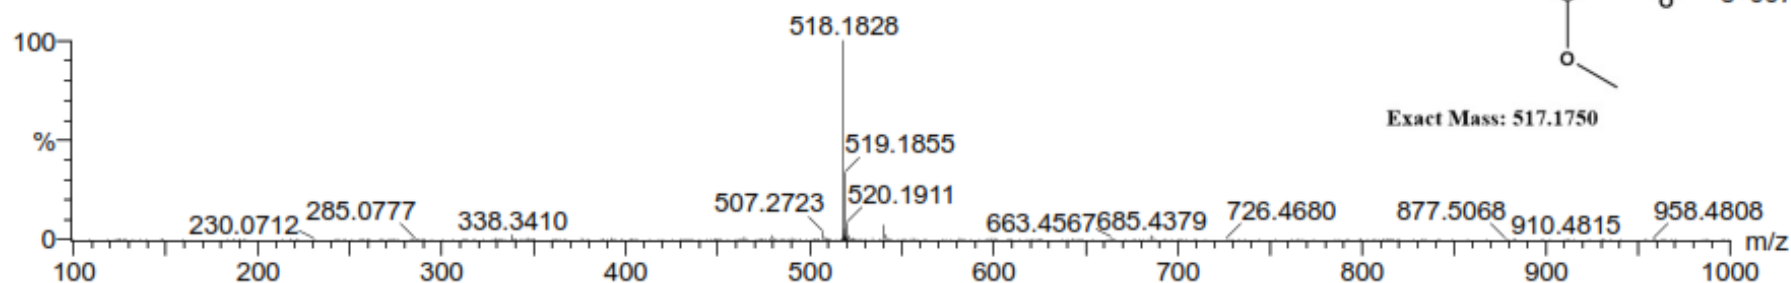

Minimum: -1.5  
Maximum: 2.0 5.0 50.0

| Mass     | Calc. Mass | mDa | PPM | DBE  | i-FIT | Norm | Conf (%) | Formula       |
|----------|------------|-----|-----|------|-------|------|----------|---------------|
| 518.1828 | 518.1828   | 0.0 | 0.0 | 21.5 | 439.5 | n/a  | n/a      | C30 H24 N5 O4 |

# Spectral data of compound 5t

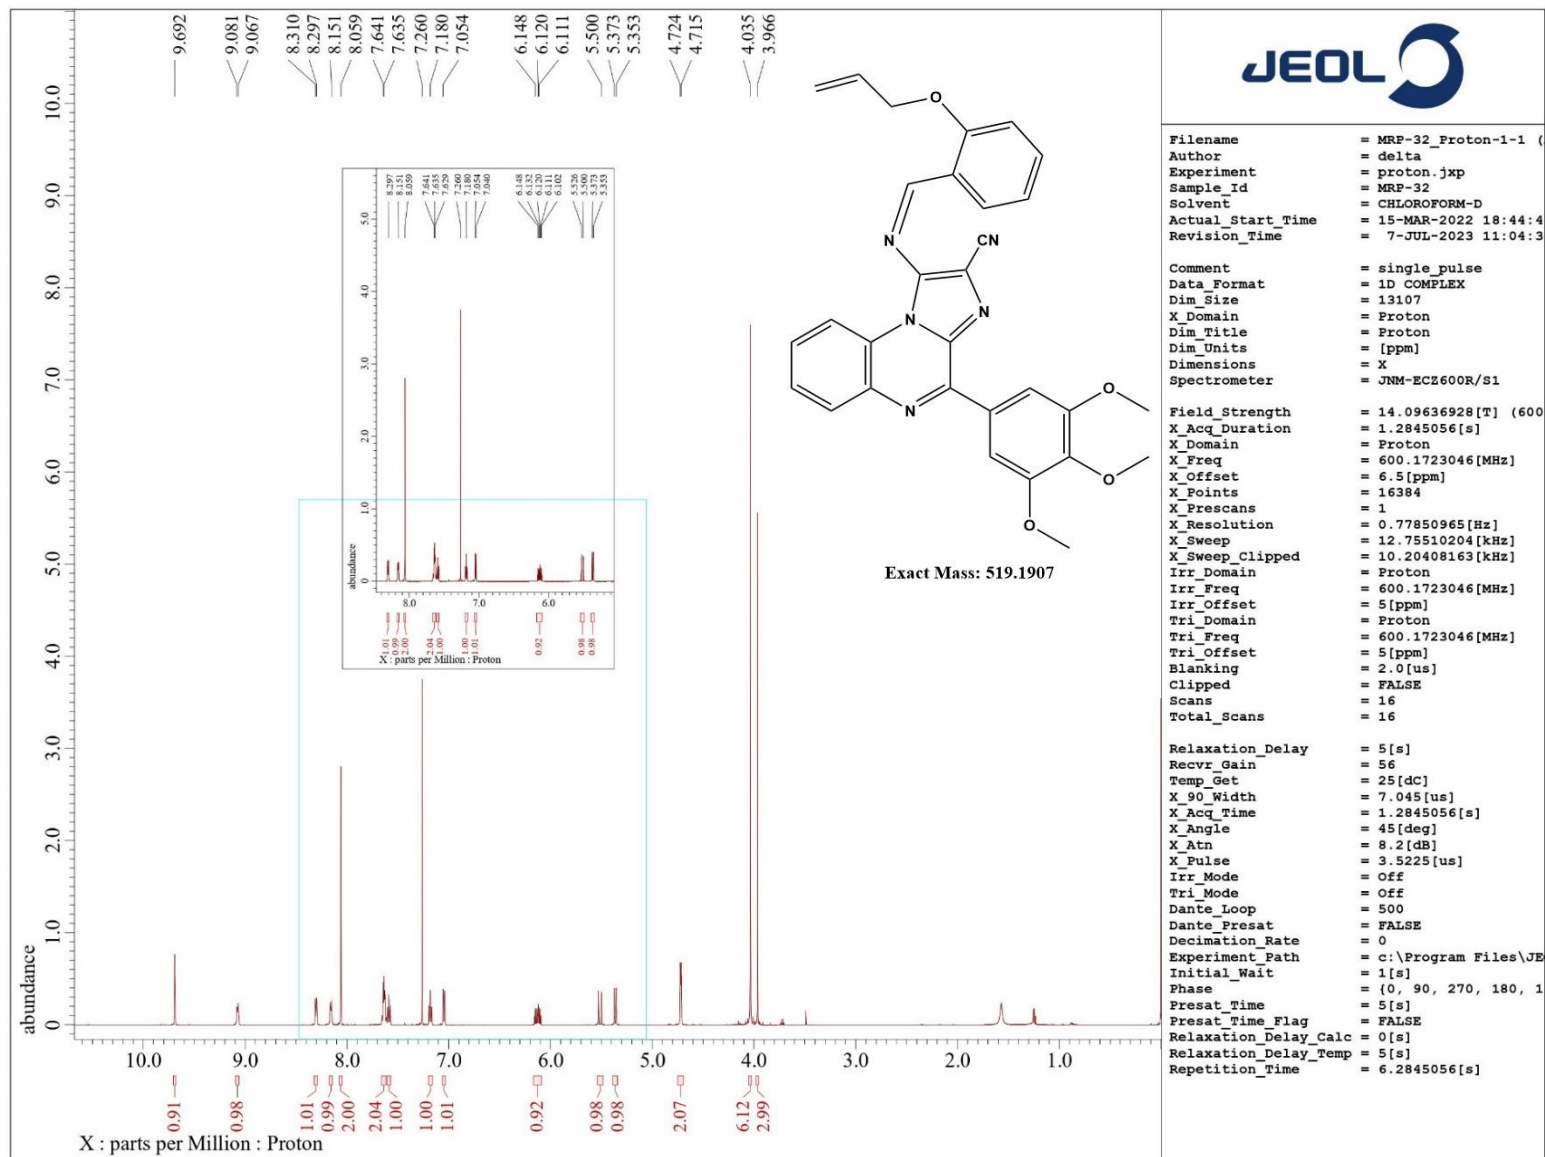



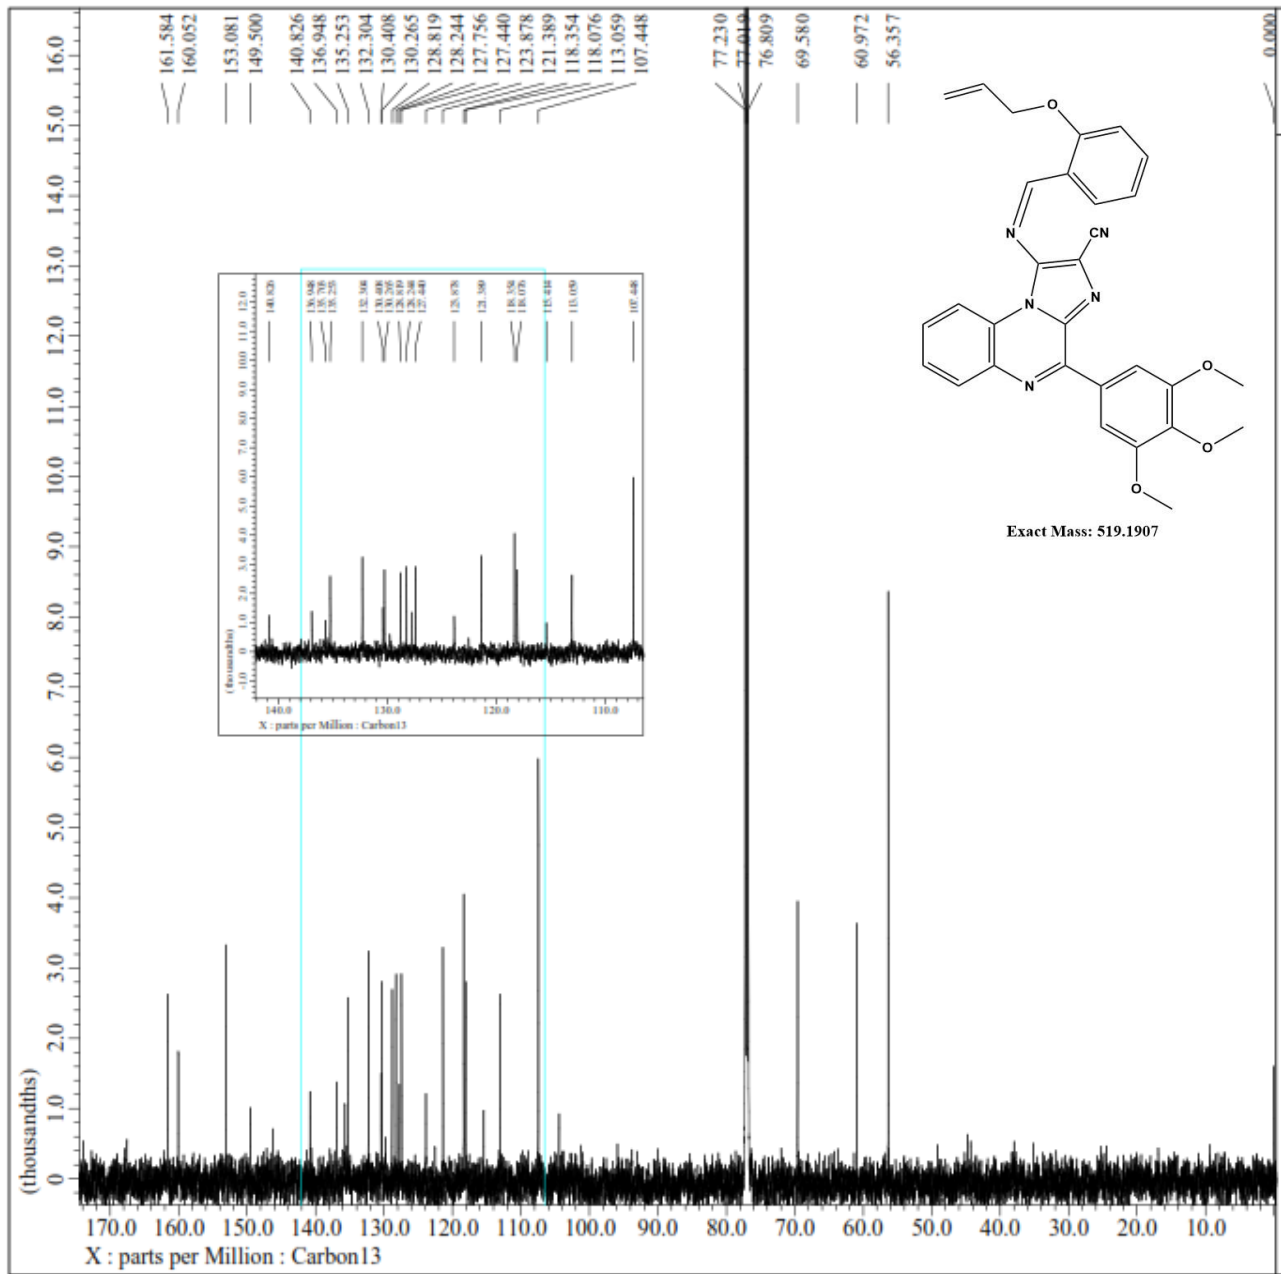

# Elemental Composition Report

## Single Mass Analysis

Tolerance = 5.0 PPM / DBE: min = -1.5, max = 50.0

Element prediction: Off

Number of isotope peaks used for i-FIT = 5

Monoisotopic Mass, Even Electron Ions

675 formula(e) evaluated with 3 results within limits (up to 1 closest results for each ma

Elements Used:

C: 1-60 H: 1-100 N: 0-10 O: 0-10

Sample Name : MRP\_32

Test Name :

260522\_MRP\_32 20 (0.223)

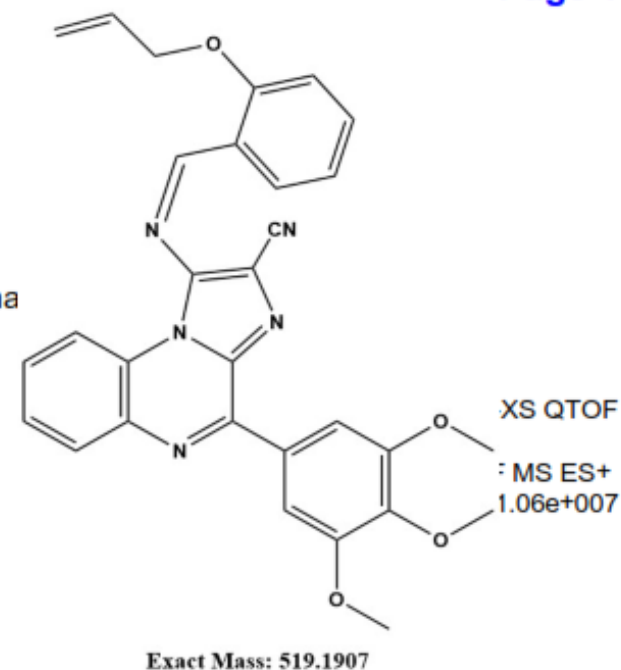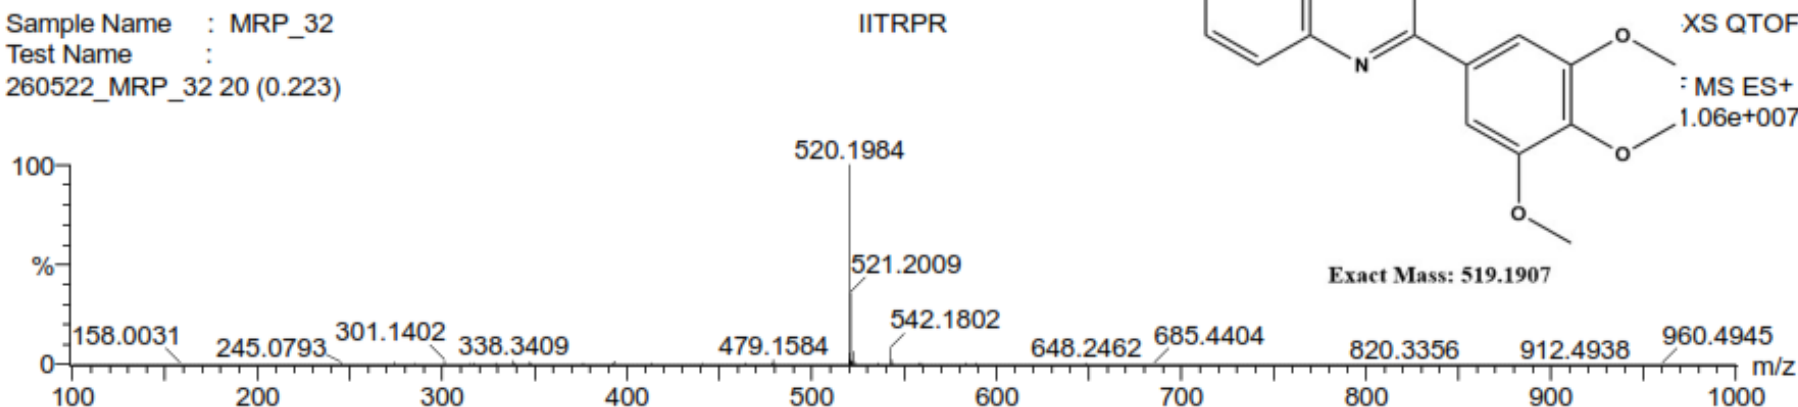

Minimum: -1.5  
 Maximum: 2.0 5.0 50.0

| Mass     | Calc. Mass | mDa  | PPM  | DBE  | i-FIT  | Norm | Conf (%) | Formula       |
|----------|------------|------|------|------|--------|------|----------|---------------|
| 520.1984 | 520.1985   | -0.1 | -0.2 | 20.5 | 1203.9 | n/a  | n/a      | C30 H26 N5 O4 |

# Spectral data of compound 5u

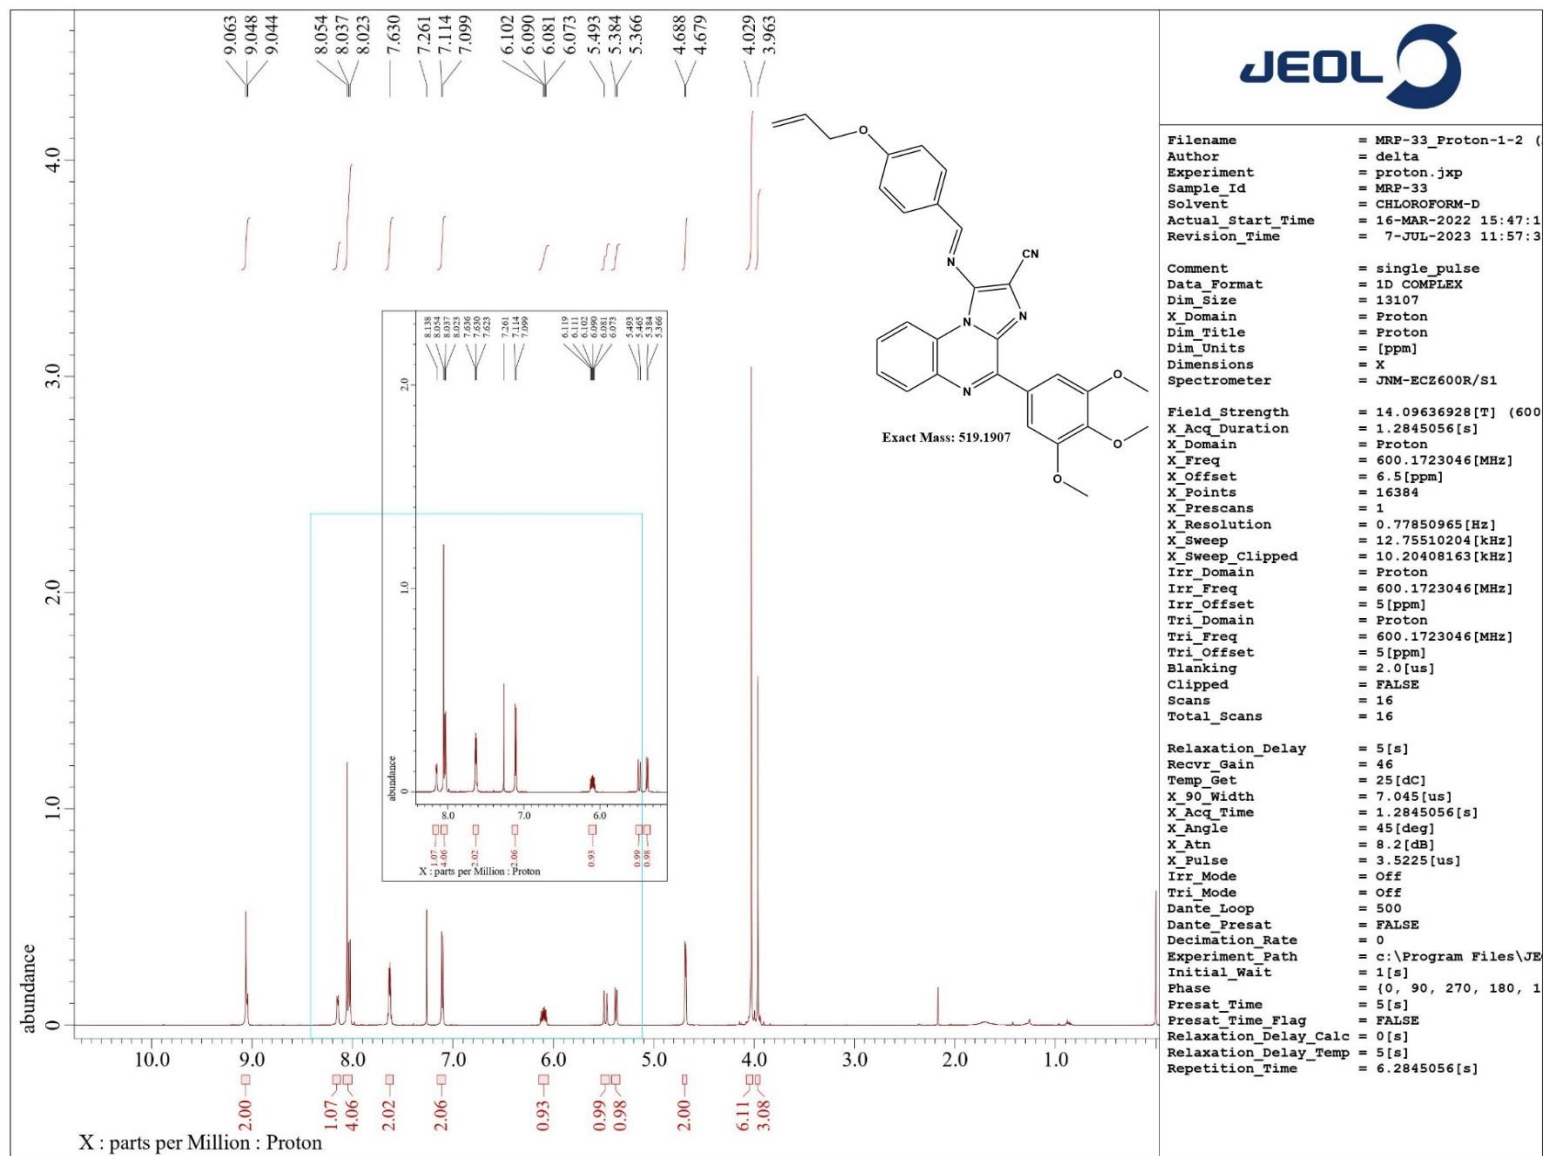

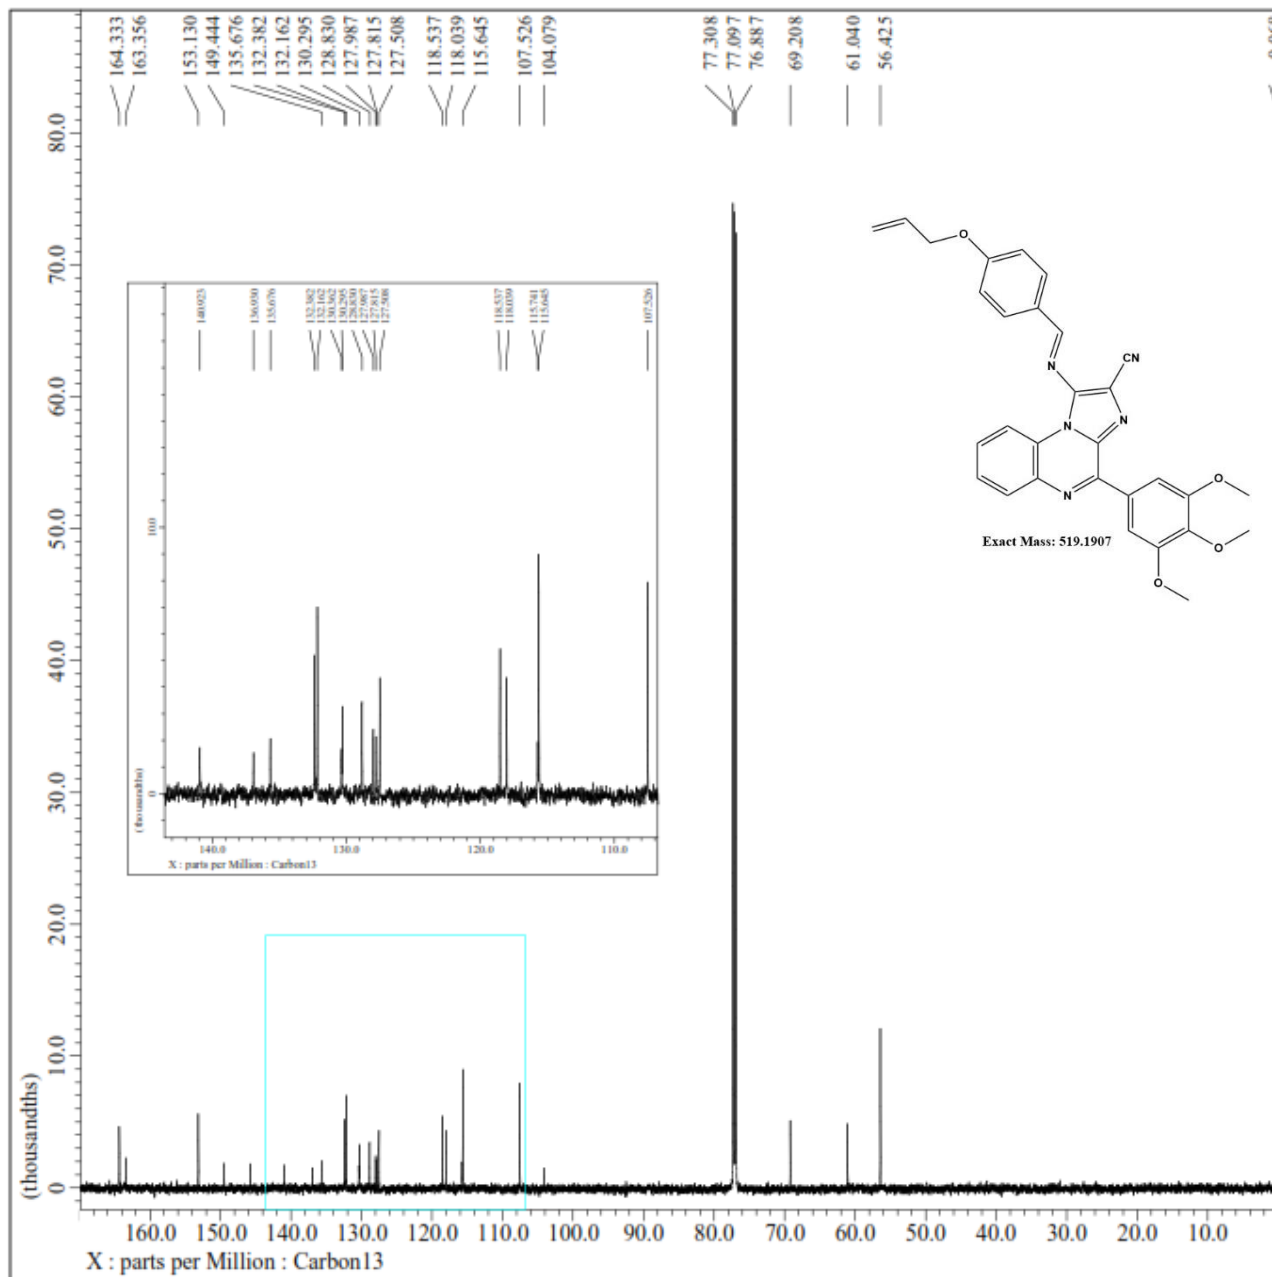

## Elemental Composition Report

### Single Mass Analysis

Tolerance = 5.0 PPM / DBE: min = -1.5, max = 50.0

Element prediction: Off

Number of isotope peaks used for i-FIT = 5

Monoisotopic Mass, Even Electron Ions

675 formula(e) evaluated with 3 results within limits (up to 1 closest results for eac

Elements Used:

C: 1-60 H: 1-100 N: 0-10 O: 0-10

Sample Name : 260522\_MRP\_33

Test Name :

260522\_MRP\_33 23 (0.248)

IITRPR

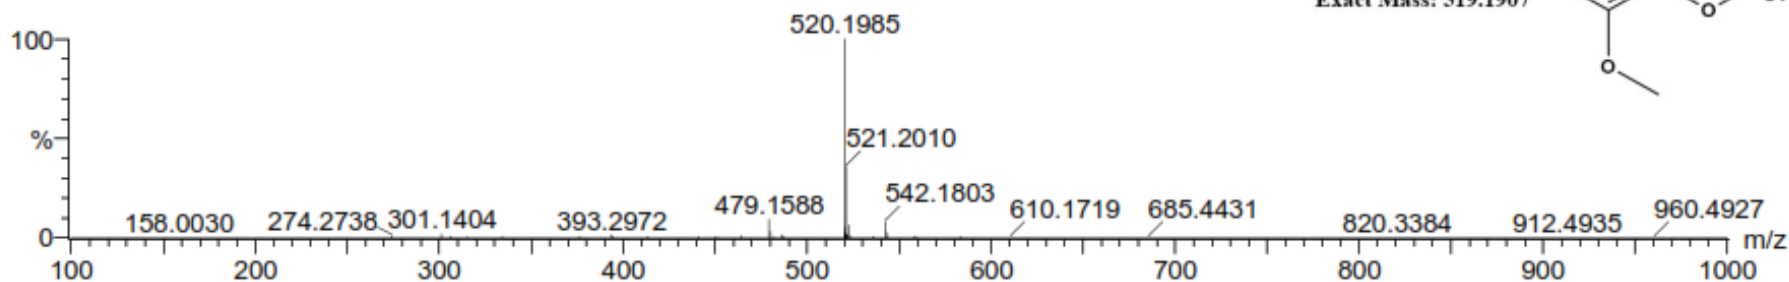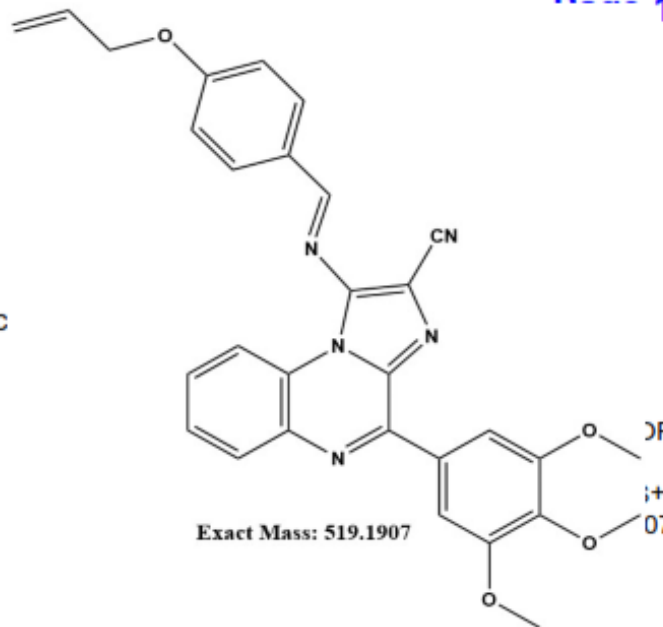

Minimum: -1.5  
Maximum: 2.0 5.0 50.0

| Mass     | Calc. Mass | mDa | PPM | DBE  | i-FIT  | Norm | Conf (%) | Formula       |
|----------|------------|-----|-----|------|--------|------|----------|---------------|
| 520.1985 | 520.1985   | 0.0 | 0.0 | 20.5 | 1215.6 | n/a  | n/a      | C30 H26 N5 O4 |

# Spectral data of compound 5v

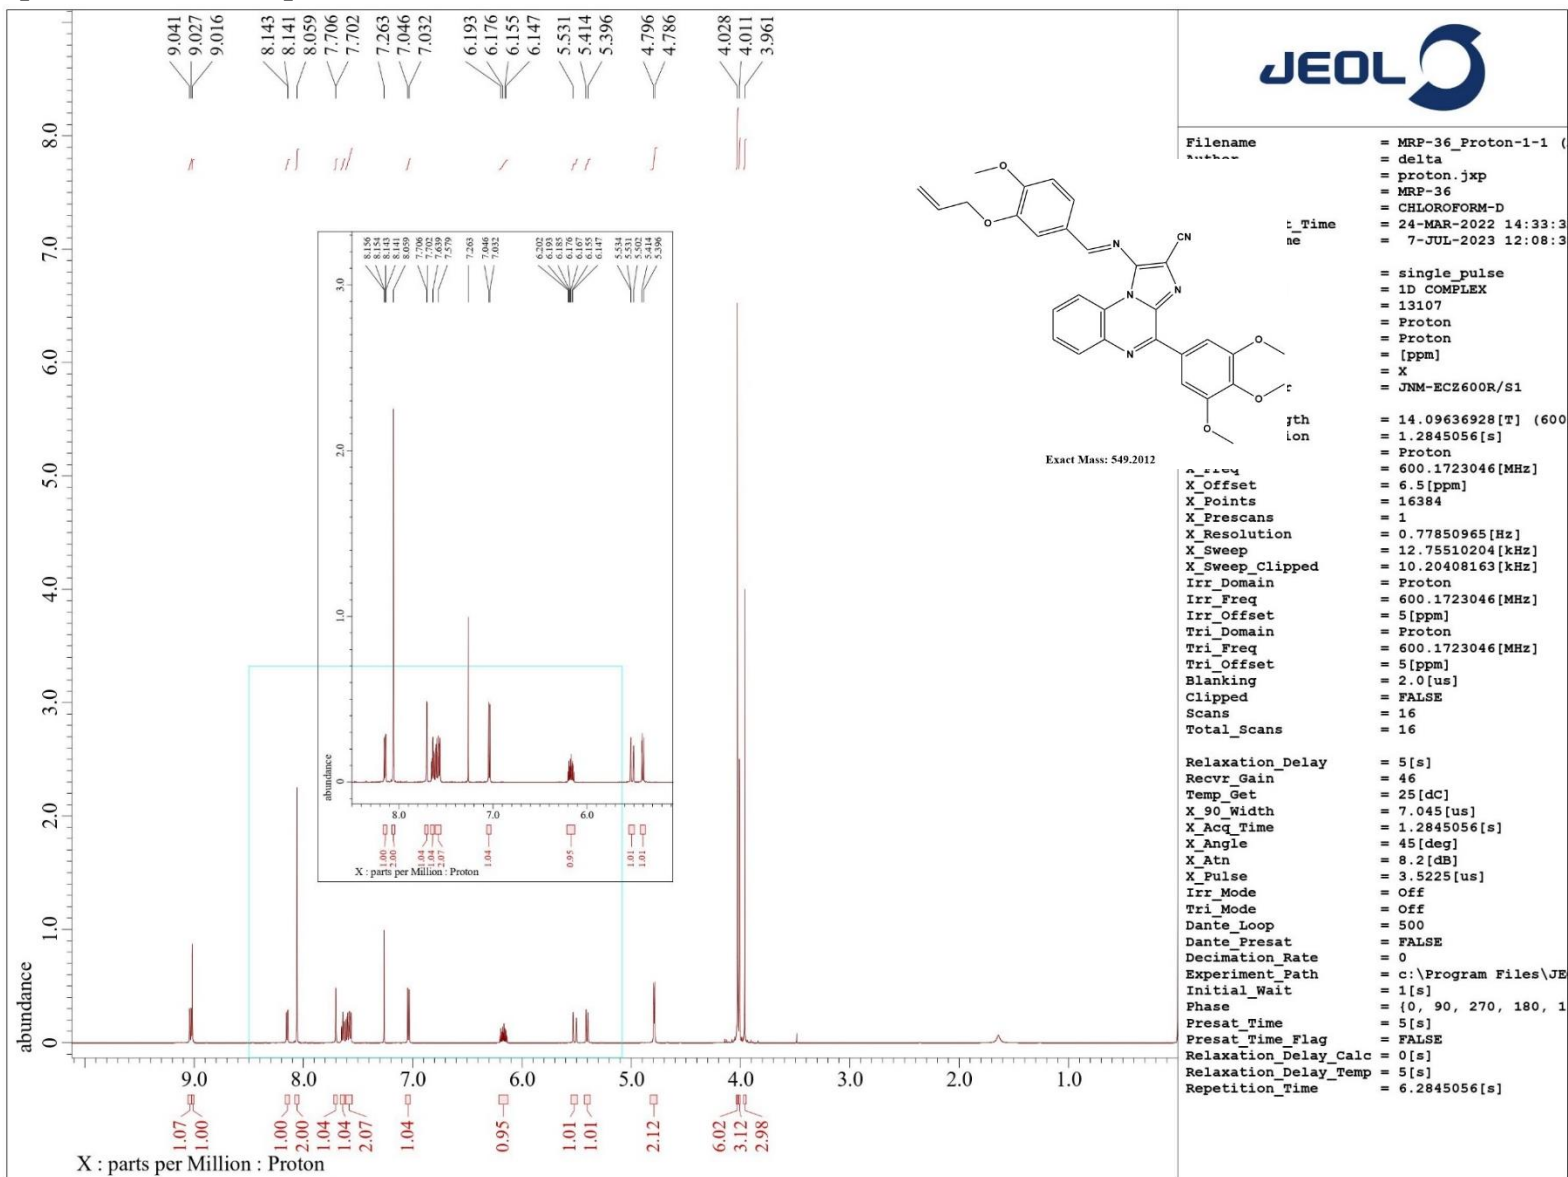

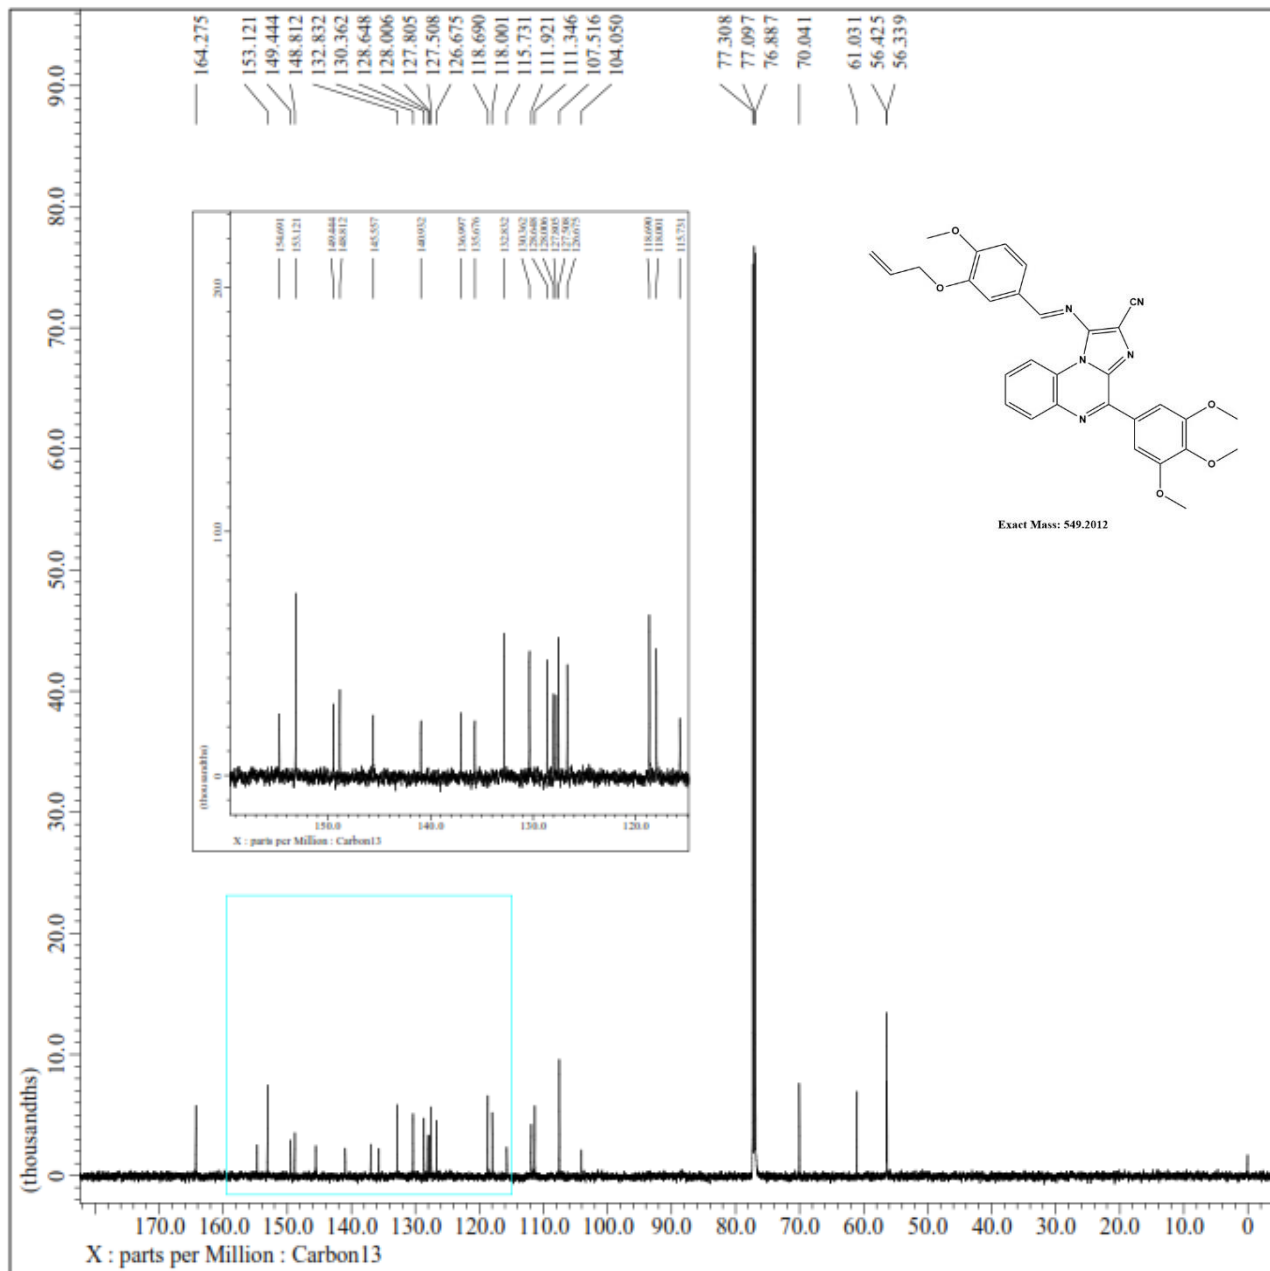



## Elemental Composition Report

1

### Single Mass Analysis

Tolerance = 5.0 PPM / DBE: min = -1.5, max = 50.0

Element prediction: Off

Number of isotope peaks used for i-FIT = 5

Monoisotopic Mass, Even Electron Ions

721 formula(e) evaluated with 3 results within limits (up to 1 closest results fo

Elements Used:

C: 1-60 H: 1-100 N: 0-10 O: 0-10

Sample Name : 260522\_MRP\_36

Test Name :

260522\_MRP\_36 24 (0.257)

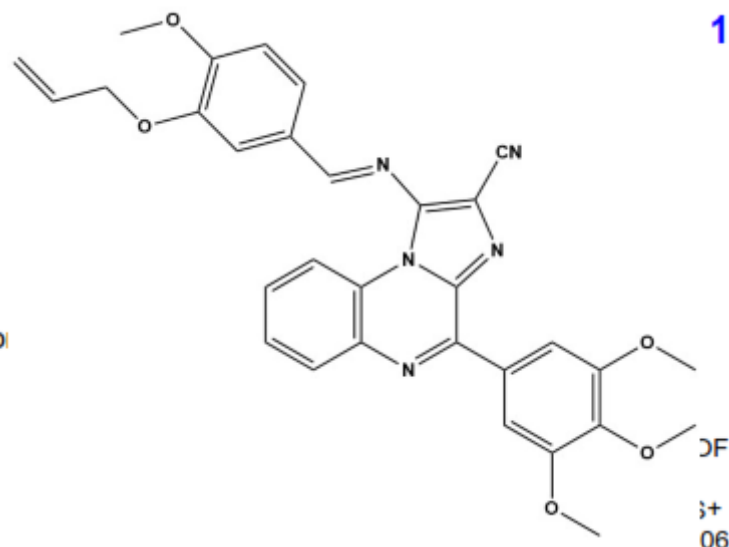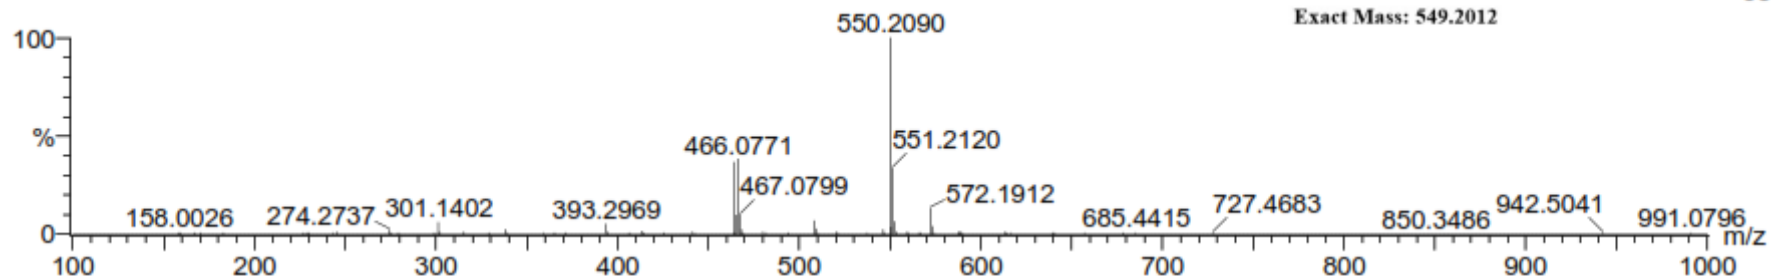

Minimum: -1.5  
Maximum: 2.0 5.0 50.0

| Mass     | Calc. Mass | mDa | PPM | DBE  | i-FIT  | Norm | Conf (%) | Formula       |
|----------|------------|-----|-----|------|--------|------|----------|---------------|
| 550.2090 | 550.2090   | 0.0 | 0.0 | 20.5 | 1050.6 | n/a  | n/a      | C31 H28 N5 O5 |

# Spectral data of compound 5w

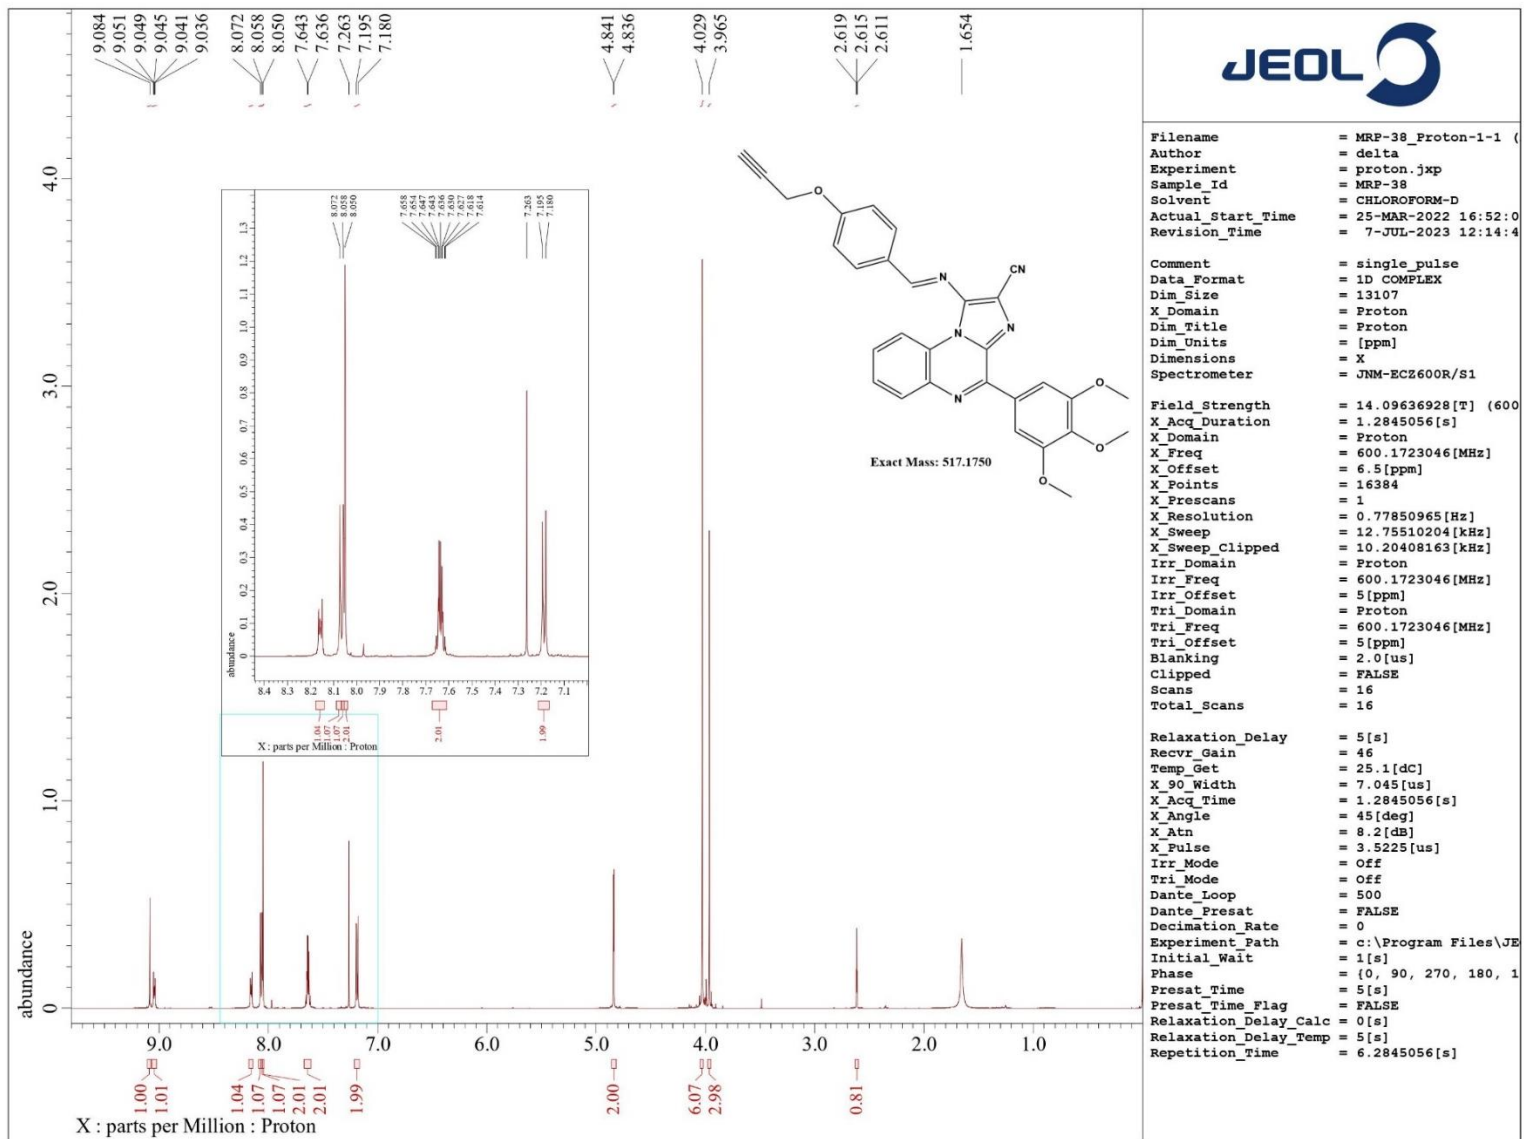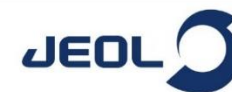

```

Filename      = MRP-38_Proton-1-1 (
Author        = delta
Experiment    = proton.jxp
Sample_Id     = MRP-38
Solvent       = CHLOROFORM-D
Actual_Start_Time = 25-MAR-2022 16:52:0
Revision_Time  = 7-JUL-2023 12:14:4

Comment       = single_pulse
Data_Format   = 1D COMPLEX
Dim_Size      = 13107
X_Domain      = Proton
Dim_Title     = Proton
Dim_Units     = [ppm]
Dimensions    = X
Spectrometer  = JNM-ECZ600R/S1

Field_Strength = 14.09636928[T] (600
X_Acq_Duration = 1.2845056[s]
X_Domain       = Proton
X_Freq         = 600.1723046[MHz]
X_Offset       = 6.5 [ppm]
X_Points       = 16384
X_Prescans     = 1
X_Resolution   = 0.77850965[Hz]
X_Sweep        = 12.75510204[kHz]
X_Sweep_Clipped = 10.20408163[kHz]
Irr_Domain     = Proton
Irr_Freq       = 600.1723046[MHz]
Irr_Offset     = 5 [ppm]
Tri_Domain     = Proton
Tri_Freq       = 600.1723046[MHz]
Tri_Offset     = 5 [ppm]
Blanking       = 2.0 [us]
Clipped        = FALSE
Scans          = 16
Total_Scans    = 16

Relaxation_Delay = 5 [s]
Recvr_Gain       = 46
Temp_Get         = 25.1 [dC]
X_90_Width      = 7.045 [us]
X_Acq_Time      = 1.2845056 [s]
X_Angle         = 45 [deg]
X_Atn           = 8.2 [dB]
X_Pulse         = 3.5225 [us]
Irr_Mode        = Off
Tri_Mode        = Off
Dante_Loop      = 500
Dante_Preset    = FALSE
Decimation_Rate = 0
Experiment_Path = c:\Program Files\JE
Initial_Wait    = 1 [s]
Phase           = {0, 90, 270, 180, 1
Preset_Time     = 5 [s]
Preset_Time_Flag = FALSE
Relaxation_Delay_Calc = 0 [s]
Relaxation_Delay_Temp = 5 [s]
Repetition_Time = 6.2845056 [s]
    
```

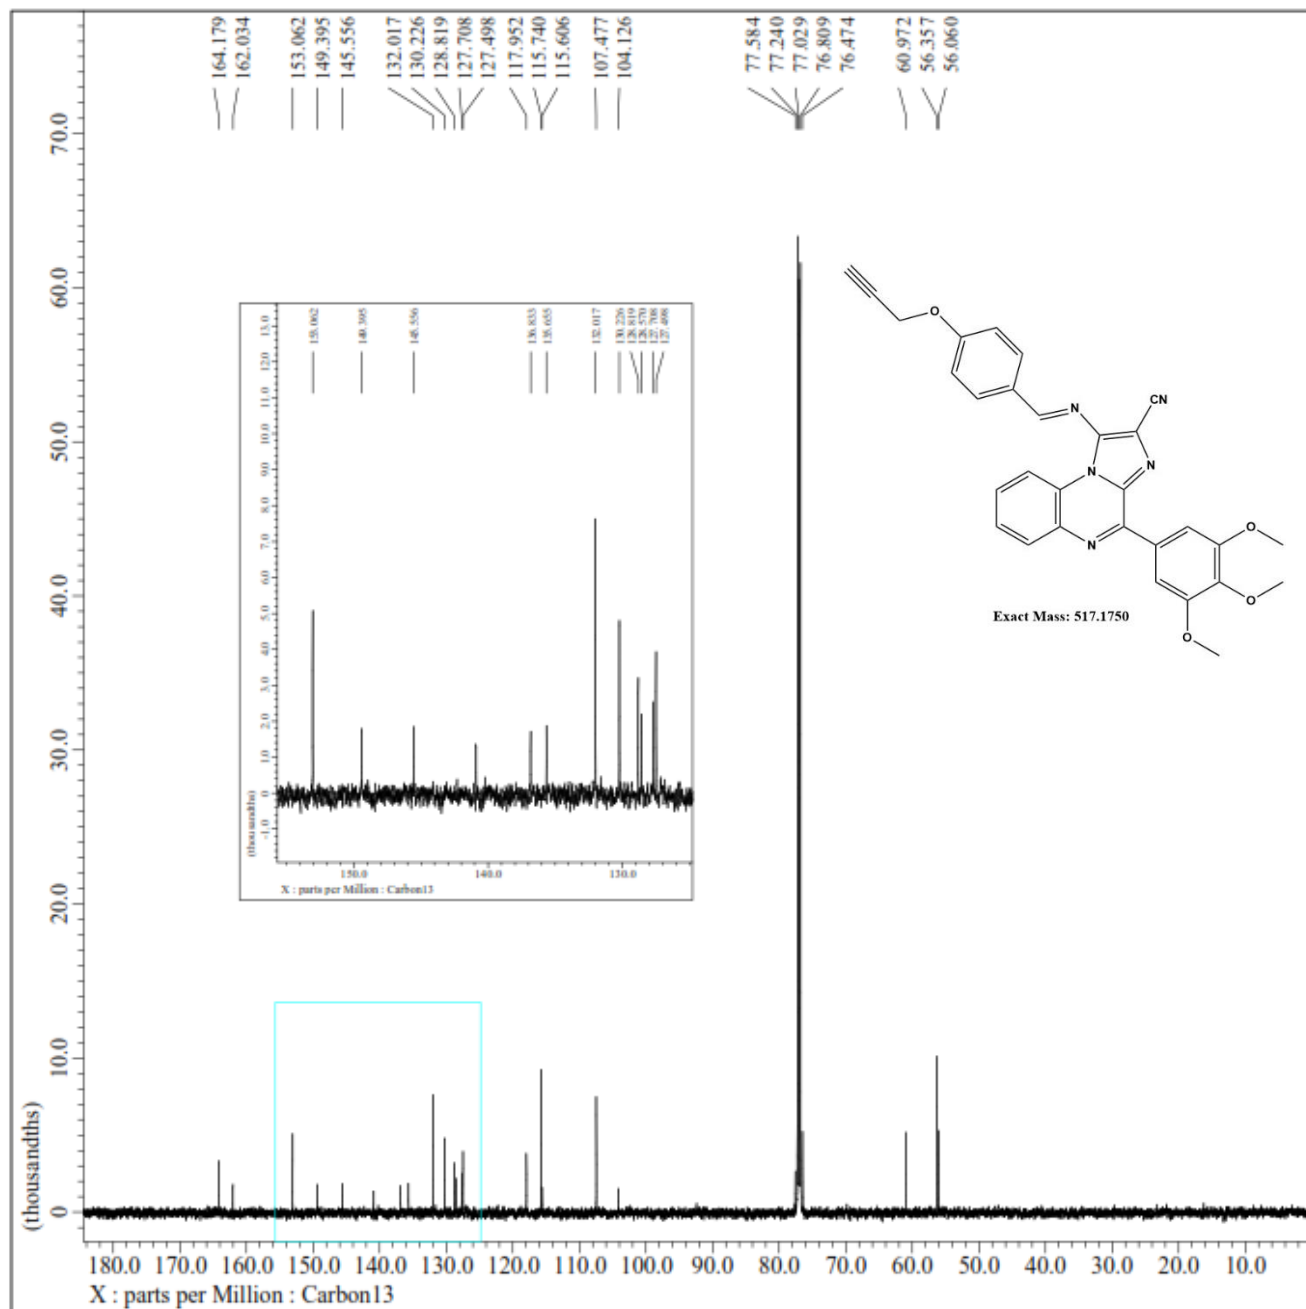

## Elemental Composition Report

Page 1

### Single Mass Analysis

Tolerance = 5.0 PPM / DBE: min = -1.5, max = 50.0

Element prediction: Off

Number of isotope peaks used for i-FIT = 5

Monoisotopic Mass, Even Electron Ions

673 formula(e) evaluated with 3 results within limits (up to 1 closest results for

Elements Used:

C: 1-60 H: 1-100 N: 0-10 O: 0-10

Sample Name : 260522\_MRP\_38

Test Name :

260522\_MRP\_38 16 (0.177)

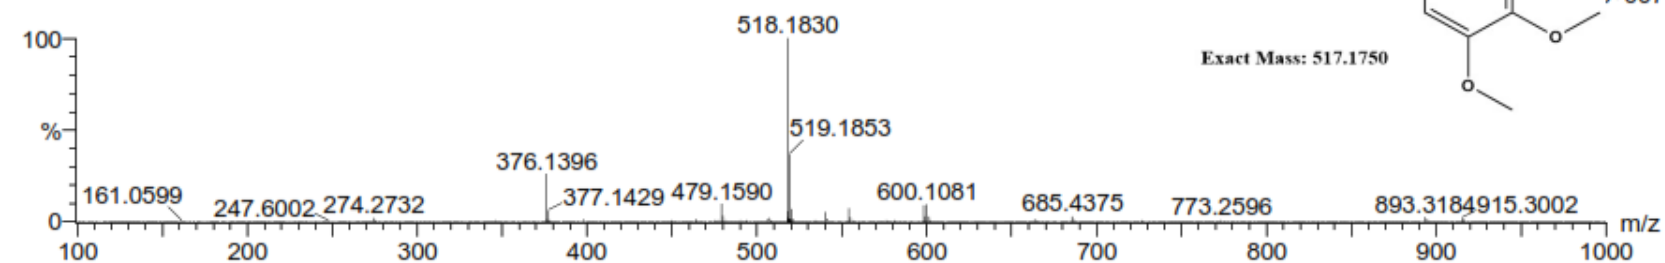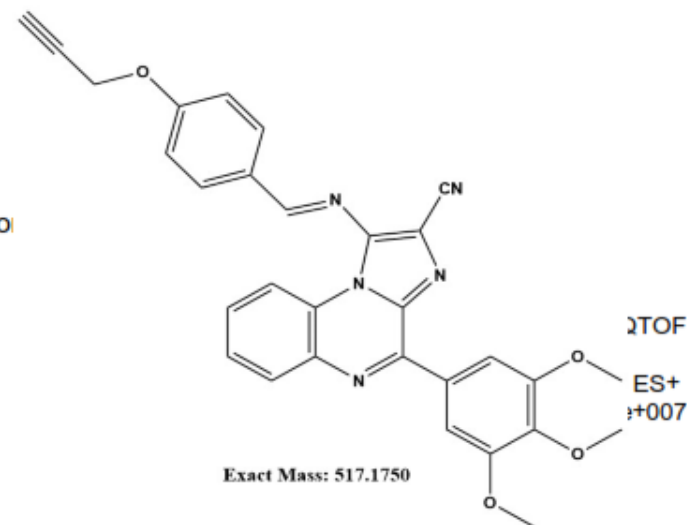

Minimum: -1.5  
Maximum: 2.0 5.0 50.0

| Mass     | Calc. Mass | mDa | PPM | DBE  | i-FIT | Norm | Conf(%) | Formula       |
|----------|------------|-----|-----|------|-------|------|---------|---------------|
| 518.1830 | 518.1828   | 0.2 | 0.4 | 21.5 | 767.7 | n/a  | n/a     | C30 H24 N5 O4 |

# SPECTRAL DATA OF 5x

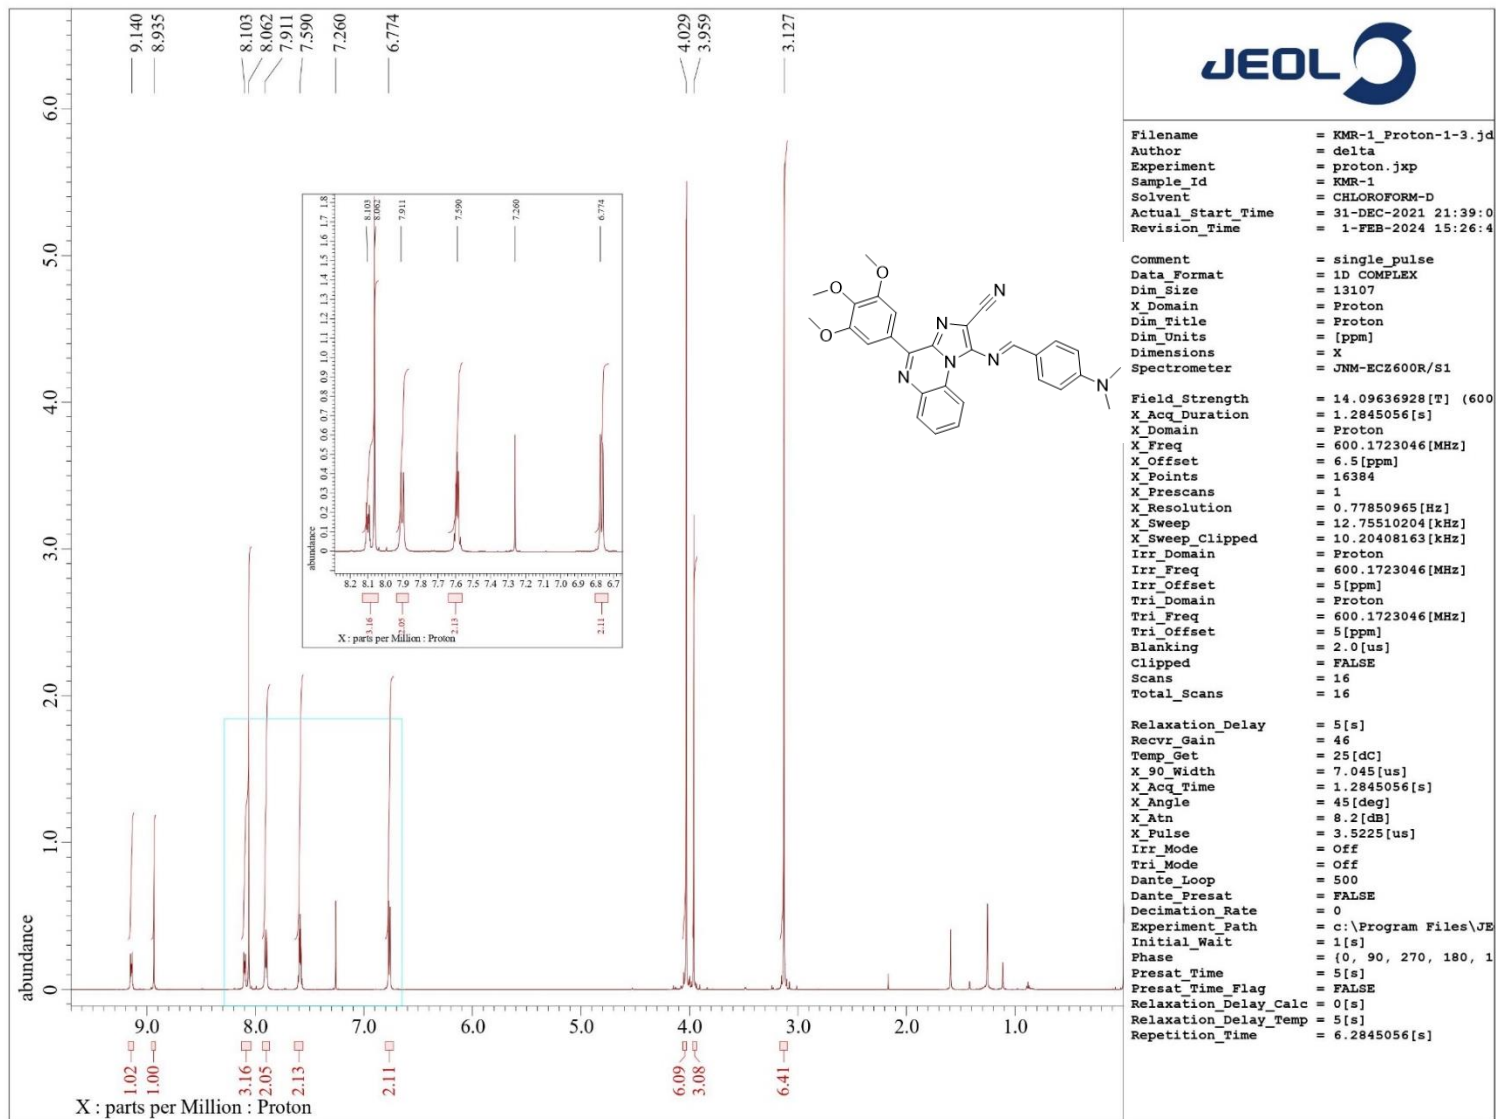

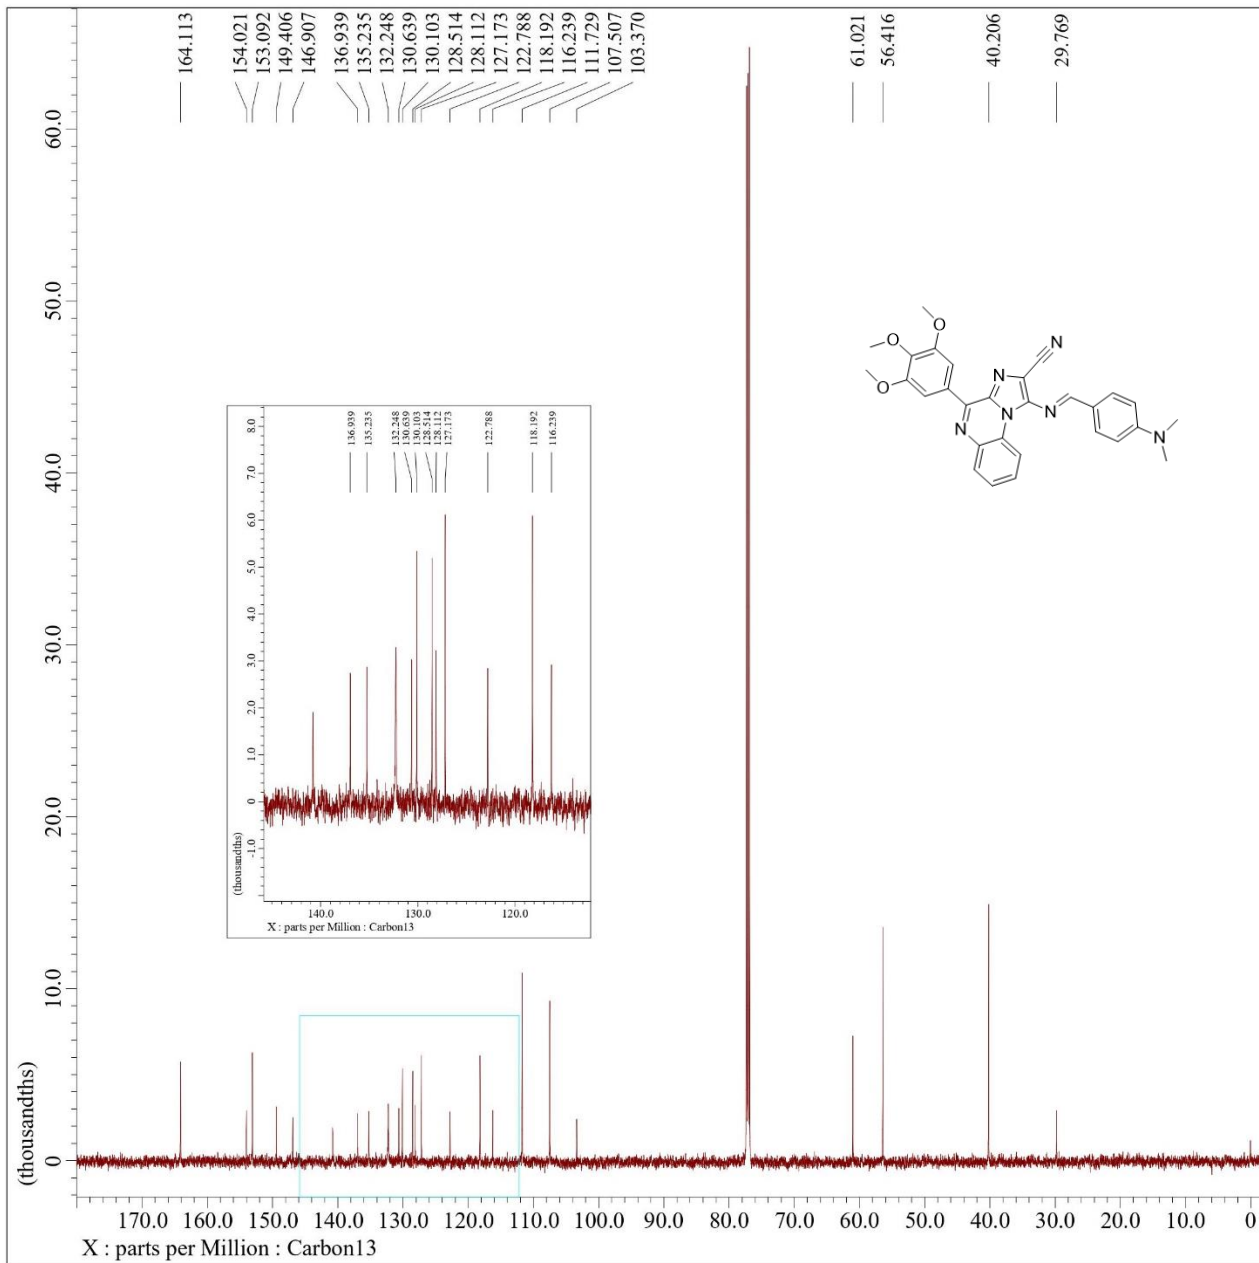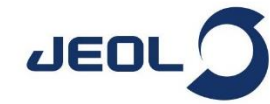

```

Filename           = KMR-1_Carbon-1-2
Author            = delta
Experiment        = carbon.jxp
Sample Id         = KMR-1
Solvent           = CHLOROFORM-D
Actual_Start_Time = 31-DEC-2021 21:4
Revision_Time     = 25-MAY-2022 06:2

Comment           = single pulse dec
Data_Format      = 1D COMPLEX
Dim Size         = 26214
X Domain         = Carbon13
Dim Title        = Carbon13
Dim Units        = [ppm]
Dimensions       = X
Spectrometer     = JNM-ECZ600R/S1

Field_Strength    = 14.09636928[T] (
X_Acq_Duration   = 0.69206016[s]
X_Domain         = Carbon13
X_Freq           = 150.91343039[MHz]
X_Offset         = 100[ppm]
X_Points         = 32768
X_Prescans       = 4
X_Resolution     = 1.44496109[Hz]
X_Sweep         = 47.34848485[kHz]
X_Sweep_Clipped = 37.87878788[kHz]
Irr_Domain       = Proton
Irr_Freq         = 600.1723046[MHz]
Irr_Offset       = 5[ppm]
Blanking         = 2.0[us]
Clipped          = TRUE
Scans            = 512
Total_Scans      = 512

Relaxation_Delay  = 2[s]
Recvr_Gain       = 56
Temp_Get         = 25[dc]
X_90_Width       = 11.025[us]
X_Acq_Time       = 0.69206016[s]
X_Angle          = 30[deg]
X_Atn            = 10.4[dB]
X_Pulse         = 3.675[us]
Irr_Atn_Dec      = 28.859[dB]
Irr_Atn_Dec_Calc = 28.859[dB]
Irr_Atn_Dec_Default_Calc = 28.859[dB]
Irr_Atn_No     = 28.859[dB]
Irr_Dec_Bandwidth_Hz = 7.23684211[kHz]
Irr_Dec_Bandwidth_Fpm = 12.05794078[ppm]
Irr_Dec_Freq     = 600.1723046[MHz]
Irr_Dec_Merit_Factor = 2.2
Irr_Decoupling  = TRUE
Irr_No     = TRUE
Irr_Noise      = WALTZ
Irr_Offset_Default = 5[ppm]
Irr_Pwidth     = 76[us]
Irr_Pwidth_Default = 76[us]
Irr_Pwidth_Default_Calc = 76[us]
Irr_Pwidth_Templ = 76[us]
Irr_Wurst     = FALSE
Decimation_Rate = 0
Experiment_Path = c:\Program Files
Initial_Wait   = 1[s]
Noe_Time      = 2[s]

```

# Elemental Composition Report

## Single Mass Analysis

Tolerance = 10.0 PPM / DBE: min = -1.5, max = 50.0

Element prediction: Off

Number of isotope peaks used for i-FIT = 5

Monoisotopic Mass, Even Electron Ions

1281 formula(e) evaluated with 11 results within limits (up to 1 closest res)

Elements Used:

C: 0-50 H: 0-100 N: 5-10 O: 0-10 S: 0-3

Sample Name : KMR\_1

Test Name :

23032022\_KMR\_1 12 (0.265)

IITRPR

XEVO G2-XS QTOF

1: TOF MS ES+  
6.25e+005

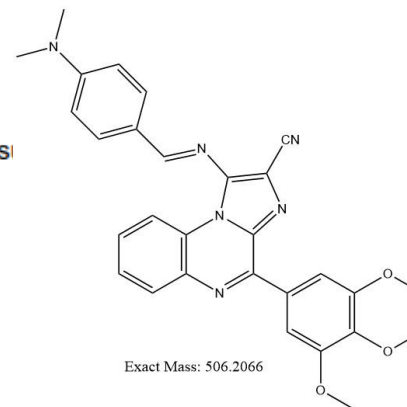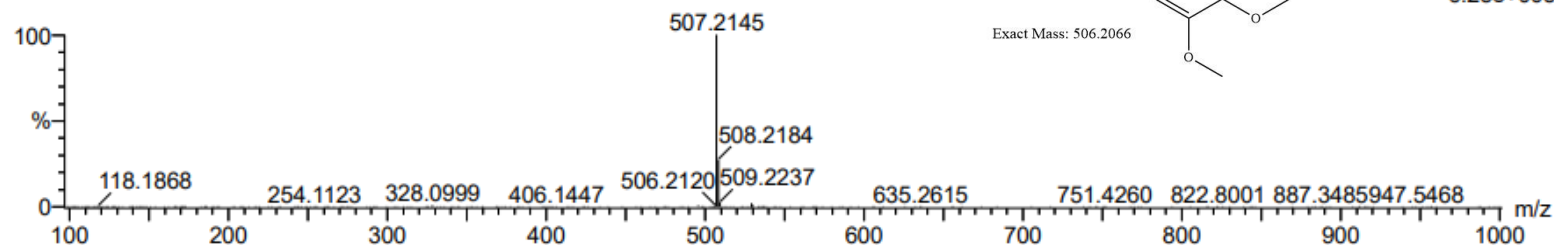

Minimum: -1.5  
Maximum: 2.0 10.0 50.0

| Mass     | Calc. Mass | mDa | PPM | DBE  | i-FIT | Norm | Conf (%) | Formula                                                       |
|----------|------------|-----|-----|------|-------|------|----------|---------------------------------------------------------------|
| 507.2145 | 507.2145   | 0.0 | 0.0 | 19.5 | 50.4  | n/a  | n/a      | C <sub>29</sub> H <sub>27</sub> N <sub>6</sub> O <sub>3</sub> |



# SPECTRAL DATA OF 5y

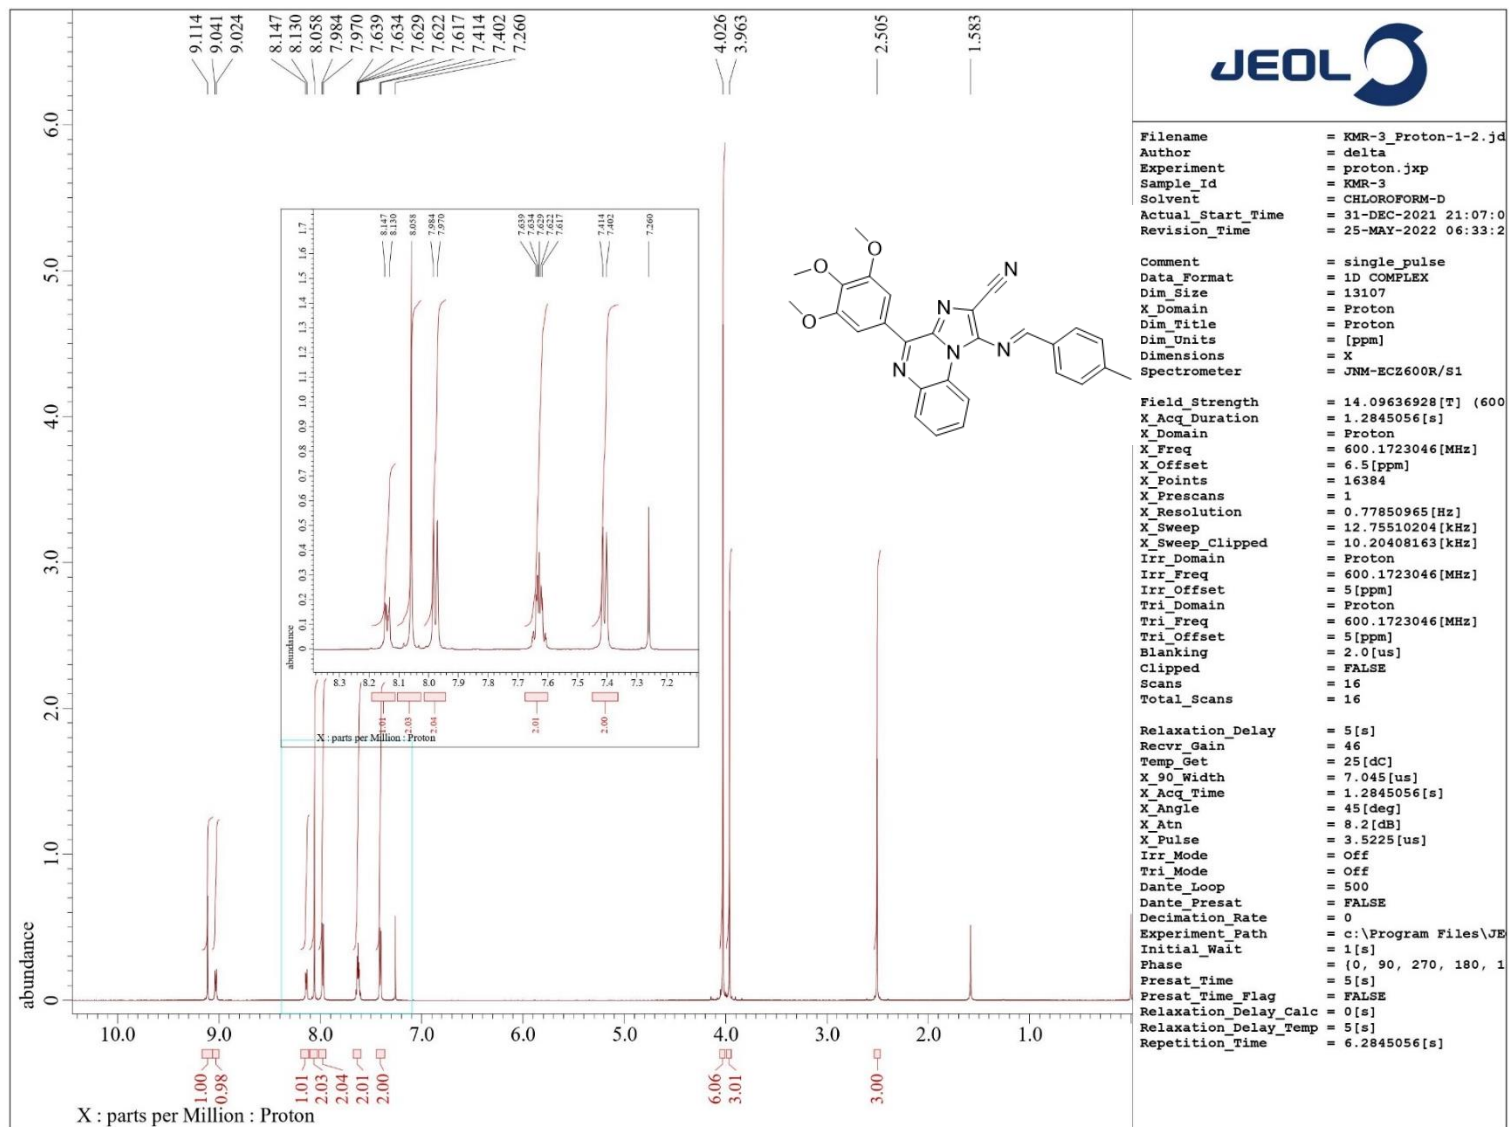

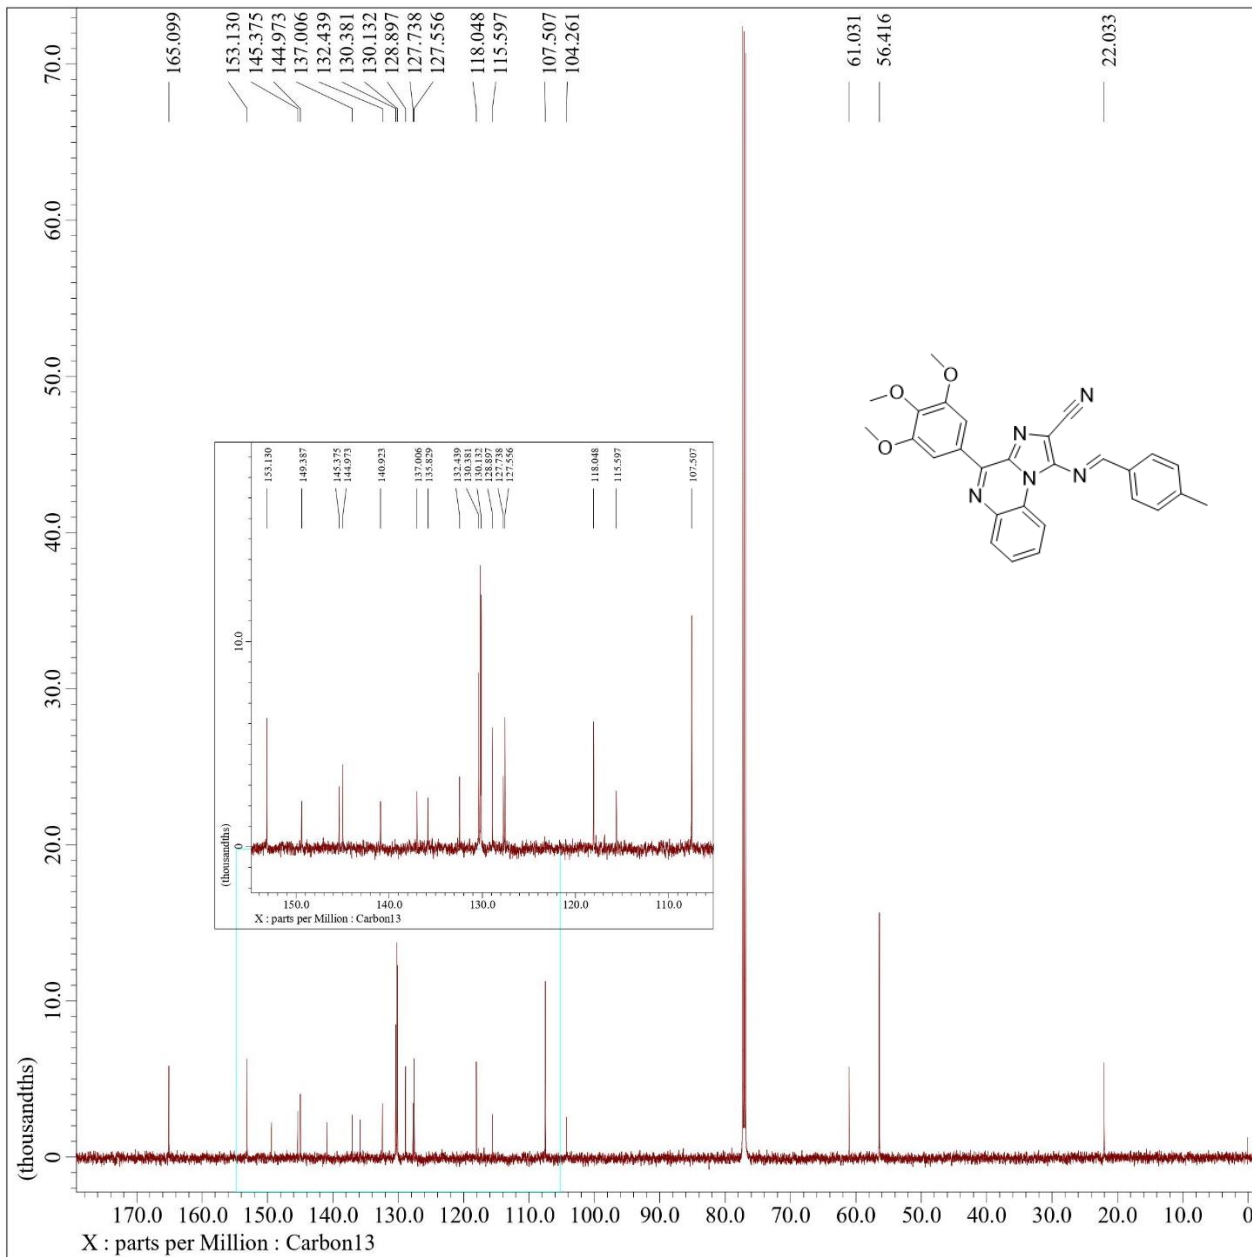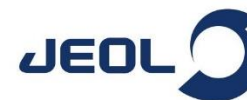

Filename = KMR-3 C-2.jdf  
 Author = delta  
 Experiment = carbon.jxp  
 Sample\_id = KMR-3  
 Solvent = CHLOROFORM-D  
 Actual\_Start\_Time = 31-DEC-2021 21:1  
 Revision\_Time = 25-MAY-2022 06:3

Comment = single pulse dec  
 Data\_Format = 1D COMPLEX  
 Dim\_Size = 26214  
 X\_Domain = Carbon13  
 Dim\_Title = Carbon13  
 Dim\_Units = [ppm]  
 Dimensions = X  
 Spectrometer = JNM-ECZ600R/S1

Field\_Strength = 14.09636928[T]  
 X\_Acq\_Duration = 0.69206016[s]  
 X\_Domain = Carbon13  
 X\_Freq = 150.91343039[MHz]  
 X\_Offset = 100[ppm]  
 X\_Points = 32768  
 X\_Prescans = 4  
 X\_Resolution = 1.44496109[Hz]  
 X\_Sweep = 47.34848485[kHz]  
 X\_Sweep\_Clipped = 37.87878788[kHz]  
 Irr\_Domain = Proton  
 Irr\_Freq = 600.1723046[MHz]  
 Irr\_Offset = 5[ppm]  
 Blanking = 2.0[us]  
 Clipped = TRUE  
 Scans = 512  
 Total\_Scans = 512

Relaxation\_Delay = 2[s]  
 Recvr\_Gain = 56  
 Temp\_Get = 25[dC]  
 X\_90\_Width = 11.025[us]  
 X\_Acq\_Time = 0.69206016[s]  
 X\_Angle = 30[deg]  
 X\_Atn = 10.4[dB]  
 X\_Pulse = 3.675[us]  
 Irr\_Atn\_Dec = 28.859[dB]  
 Irr\_Atn\_Dec\_Calc = 28.859[dB]  
 Irr\_Atn\_Dec\_Default\_Calc = 28.859[dB]  
 Irr\_Atn\_No = 28.859[dB]  
 Irr\_Dec\_Bandwidth\_Hz = 7.23684211[kHz]  
 Irr\_Dec\_Bandwidth\_Ppm = 12.05794078[ppm]  
 Irr\_Dec\_Freq = 600.1723046[MHz]  
 Irr\_Dec\_Merit\_Factor = 2.2  
 Irr\_Decoupling = TRUE  
 Irr\_No = TRUE  
 Irr\_Noise = WALTZ  
 Irr\_Offset\_Default = 5[ppm]  
 Irr\_Pwidth = 76[us]  
 Irr\_Pwidth\_Default = 76[us]  
 Irr\_Pwidth\_Default\_Calc = 76[us]  
 Irr\_Pwidth\_Temp1 = 76[us]  
 Irr\_Wurst = FALSE  
 Decimation\_Rate = 0  
 Experiment\_Path = c:\Program Files  
 Initial\_Wait = 1[s]  
 Noe\_Time = 2[s]

# Elemental Composition Report

## Single Mass Analysis

Tolerance = 10.0 PPM / DBE: min = -1.5, max = 50.0

Element prediction: Off

Number of isotope peaks used for i-FIT = 5

Monoisotopic Mass, Even Electron Ions

1169 formula(e) evaluated with 11 results within limits (up to 1 closest res)

Elements Used:

C: 0-50 H: 0-100 N: 5-10 O: 0-10 S: 0-3

Sample Name : KMR\_3

Test Name :

23032022\_KMR\_3 19 (0.418)

IITRPR

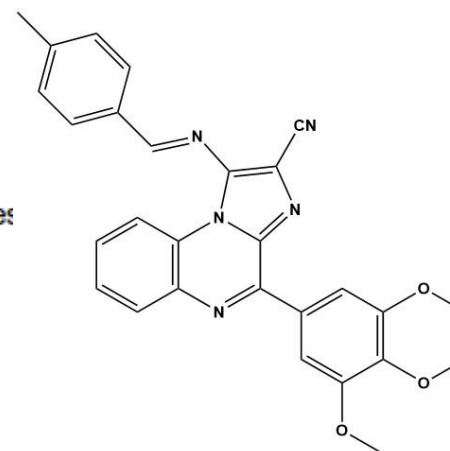

XEVO G2-XS QTOF

1: TOF MS ES+  
1.37e+006

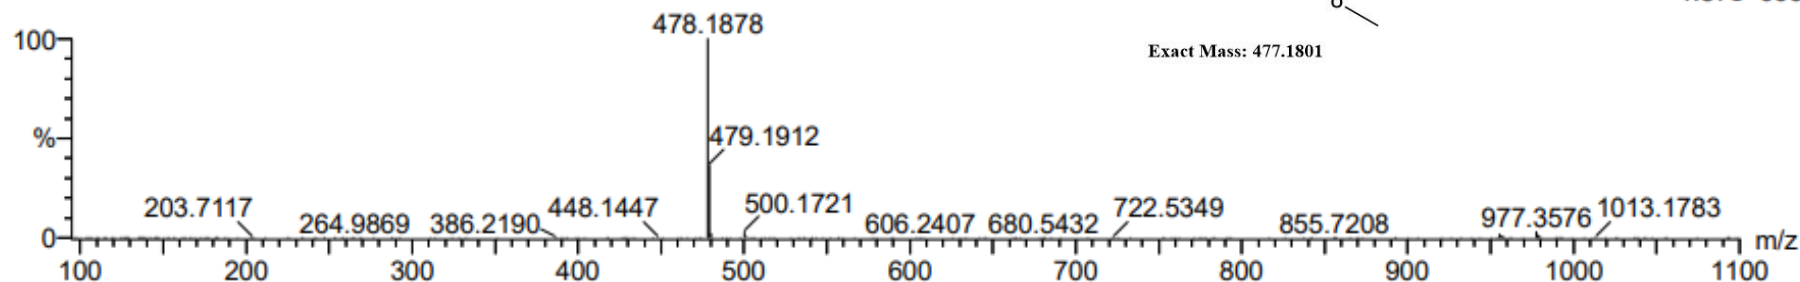

Minimum: -1.5  
Maximum: 2.0 10.0 50.0

| Mass     | Calc. Mass | mDa  | PPM  | DBE  | i-FIT | Norm | Conf (%) | Formula       |
|----------|------------|------|------|------|-------|------|----------|---------------|
| 478.1878 | 478.1879   | -0.1 | -0.2 | 19.5 | 64.6  | n/a  | n/a      | C28 H24 N5 O3 |

# SPECTRAL DATA OF 5z

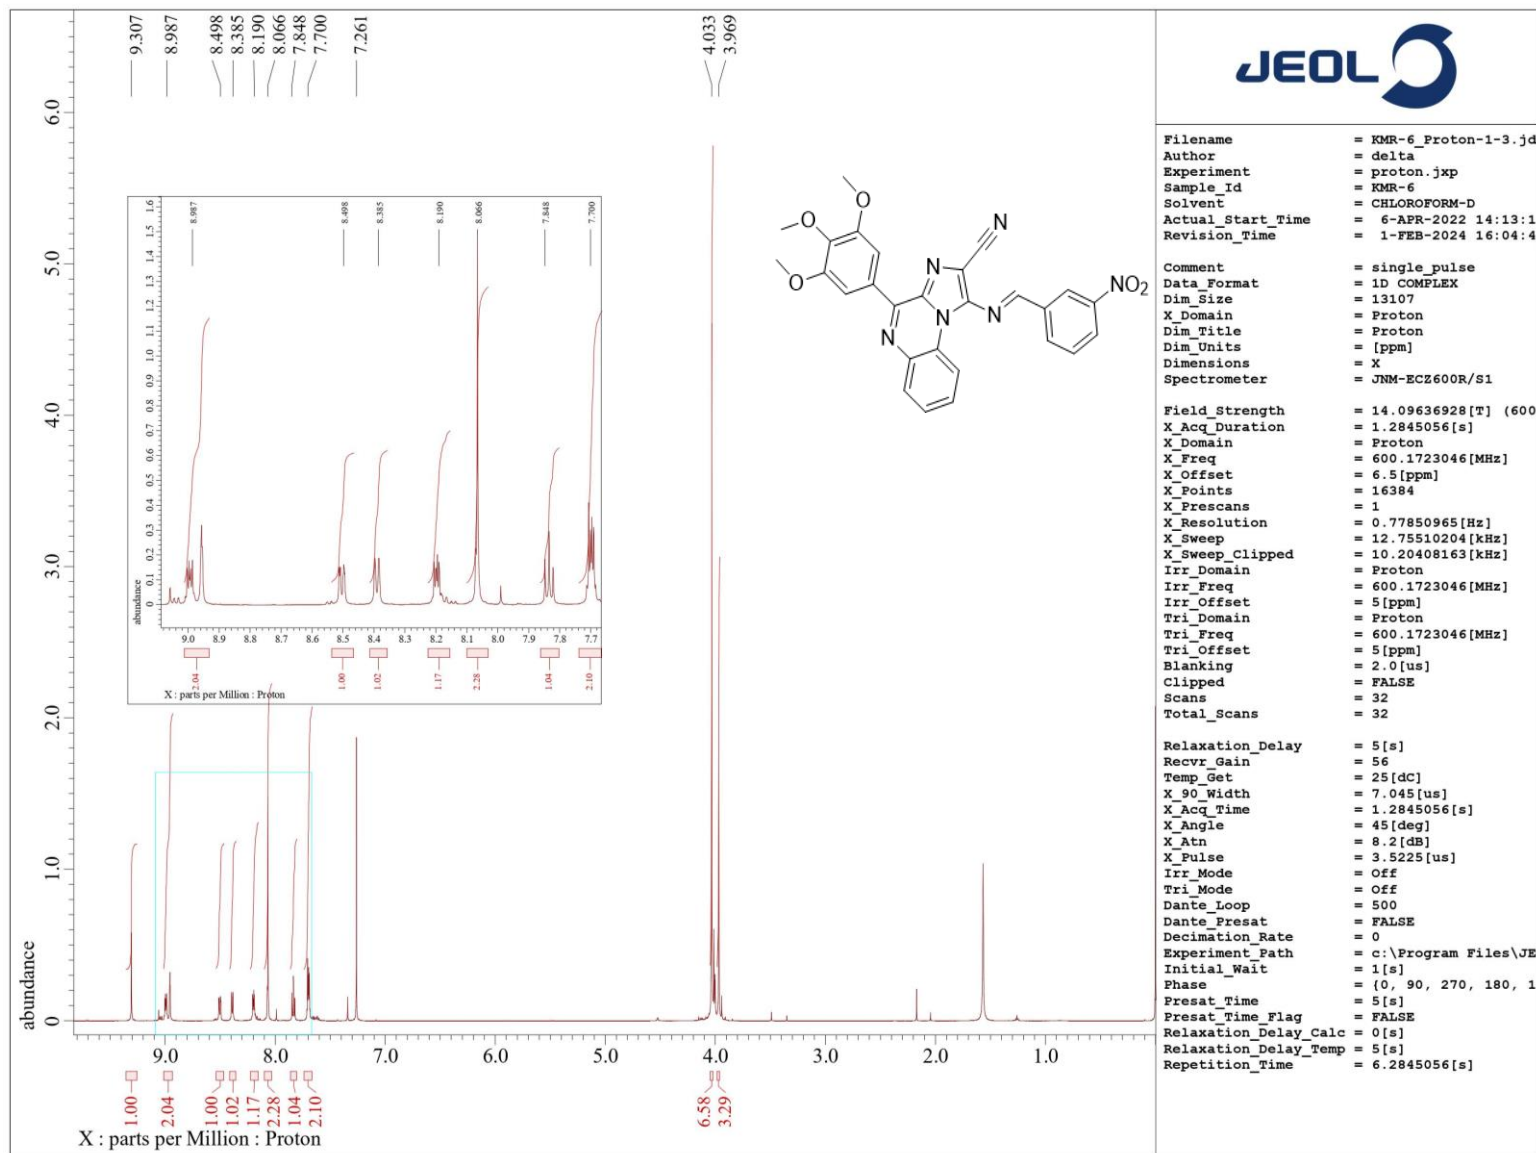

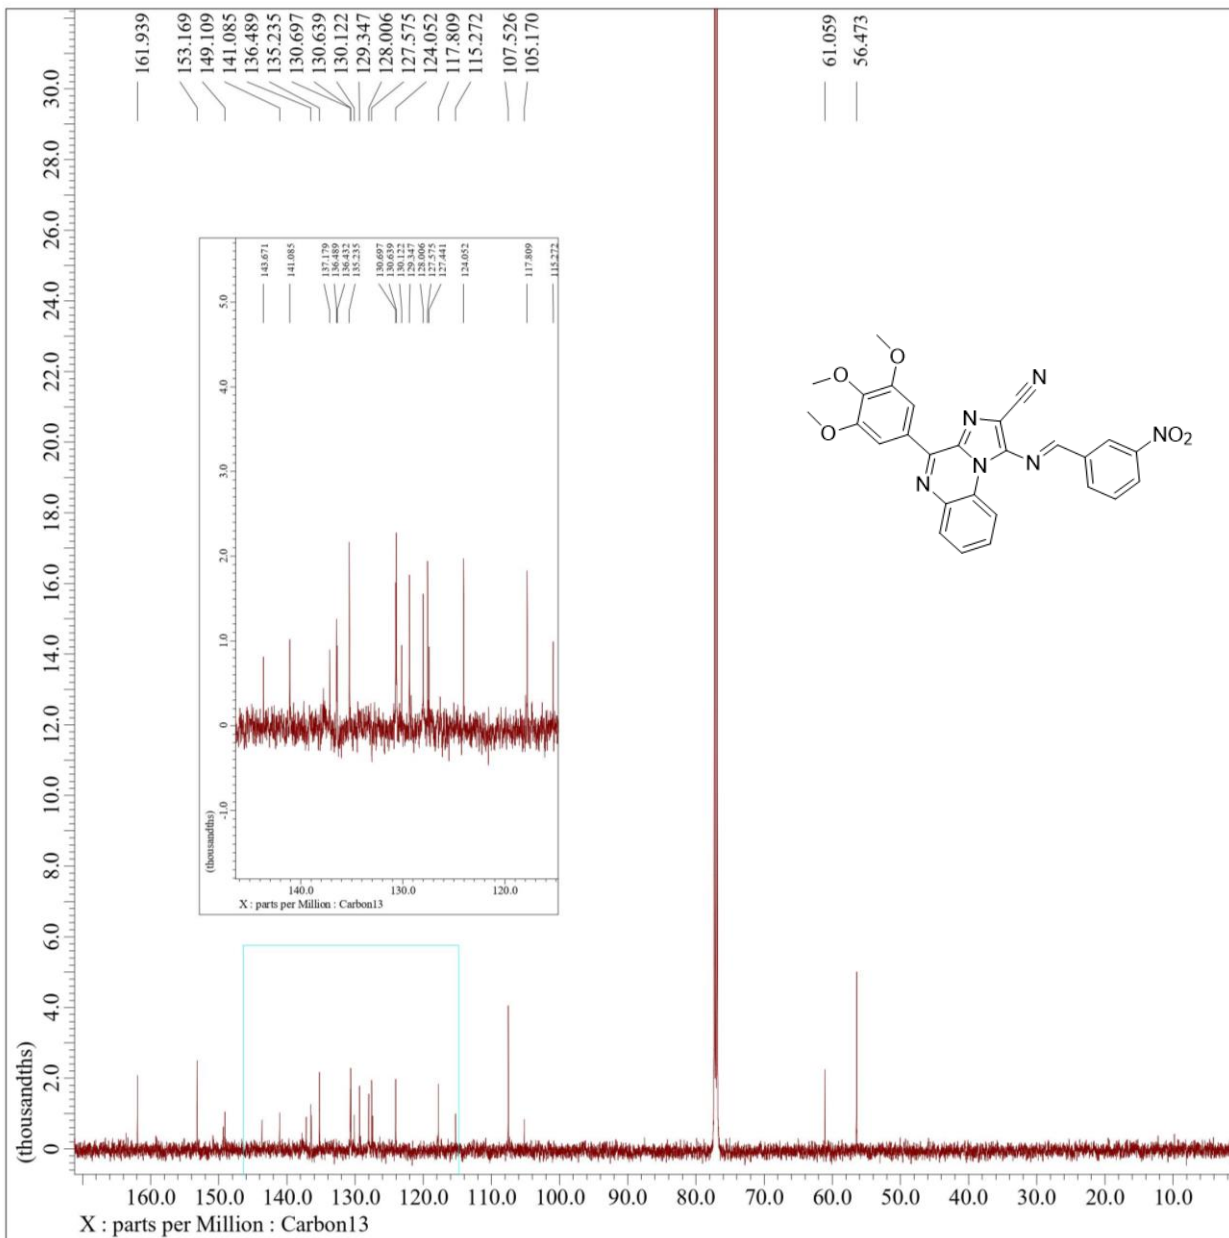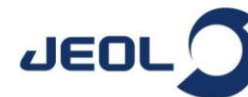

|                          |                     |
|--------------------------|---------------------|
| Filename                 | = KMR-6_Carbon-1-4  |
| Author                   | = delta             |
| Experiment               | = carbon.jxp        |
| Sample Id                | = KMR-6             |
| Solvent                  | = CHLOROFORM-D      |
| Actual_Start_Time        | = 6-APR-2022 14:1   |
| Revision_Time            | = 25-MAY-2022 12:4  |
| Comment                  | = single pulse dec  |
| Data_Format              | = 1D COMPLEX        |
| Dim_Size                 | = 26214             |
| X_Domain                 | = Carbon13          |
| Dim_Title                | = Carbon13          |
| Dim_Units                | = [ppm]             |
| Dimensions               | = X                 |
| Spectrometer             | = JNM-ECZ600R/S1    |
| Field_Strength           | = 14.09636928[T] (  |
| X_Acq_Duration           | = 0.69206016[s]     |
| X_Domain                 | = Carbon13          |
| X_Freq                   | = 150.91343039[MHz  |
| X_Offset                 | = 100 [ppm]         |
| X_Points                 | = 32768             |
| X_Prescans               | = 4                 |
| X_Resolution             | = 1.44496109[Hz]    |
| X_Sweep                  | = 47.34848485 [kHz] |
| X_Sweep_Clipped          | = 37.87878788 [kHz] |
| Irr_Domain               | = Proton            |
| Irr_Freq                 | = 600.1723046 [MHz] |
| Irr_Offset               | = 5 [ppm]           |
| Blanking                 | = 2.0 [us]          |
| Clipped                  | = TRUE              |
| Scans                    | = 1024              |
| Total_Scans              | = 1024              |
| Relaxation_Delay         | = 2 [s]             |
| Recvr_Gain               | = 56                |
| Temp_Get                 | = 25 [dC]           |
| X_90_Width               | = 11.025 [us]       |
| X_Acq_Time               | = 0.69206016 [s]    |
| X_Angle                  | = 30 [deg]          |
| X_Atn                    | = 10.4 [dB]         |
| X_Pulse                  | = 3.675 [us]        |
| Irr_Atn_Dec              | = 28.859 [dB]       |
| Irr_Atn_Dec_Calc         | = 28.859 [dB]       |
| Irr_Atn_Dec_Default_Calc | = 28.859 [dB]       |
| Irr_Atn_No               | = 28.859 [dB]       |
| Irr_Dec_Bandwidth_Hz     | = 7.23684211 [kHz]  |
| Irr_Dec_Bandwidth_Ppm    | = 12.05794078 [ppm] |
| Irr_Dec_Freq             | = 600.1723046 [MHz] |
| Irr_Dec_Merit_Factor     | = 2.2               |
| Irr_Decoupling           | = TRUE              |
| Irr_No                   | = TRUE              |
| Irr_Noise                | = WALTZ             |
| Irr_Offset_Default       | = 5 [ppm]           |
| Irr_Pwidth               | = 76 [us]           |
| Irr_Pwidth_Default       | = 76 [us]           |
| Irr_Pwidth_Default_Calc  | = 76 [us]           |
| Irr_Pwidth_Templ         | = 76 [us]           |
| Irr_Wurst                | = FALSE             |
| Decimation_Rate          | = 0                 |
| Experiment_Path          | = c:\Program Files  |
| Initial_Wait             | = 1 [s]             |
| Noe_Time                 | = 2 [s]             |



# Elemental Composition Report

## Single Mass Analysis

Tolerance = 5.0 PPM / DBE: min = -1.5, max = 50.0

Element prediction: Off

Number of isotope peaks used for i-FIT = 5

Monoisotopic Mass, Even Electron Ions

1869 formula(e) evaluated with 10 results within limits (up to 1 closest re

Elements Used:

C: 1-60 H: 1-100 N: 0-10 O: 0-10 S: 0-2

Sample Name : KMR\_6

Test Name :

260522\_KMR\_6 17 (0.197)

IITRPR

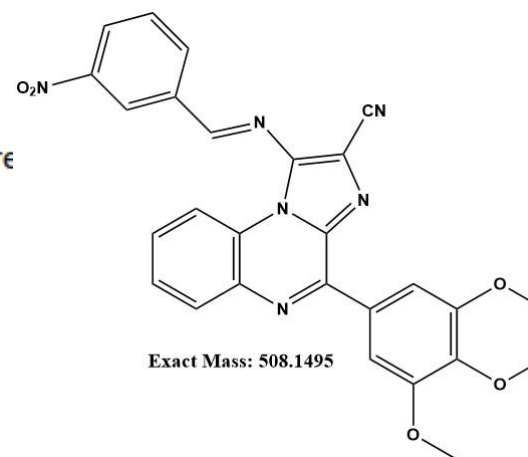

XEVO G2-XS QTOF

1: TOF MS ES+  
1.09e+007

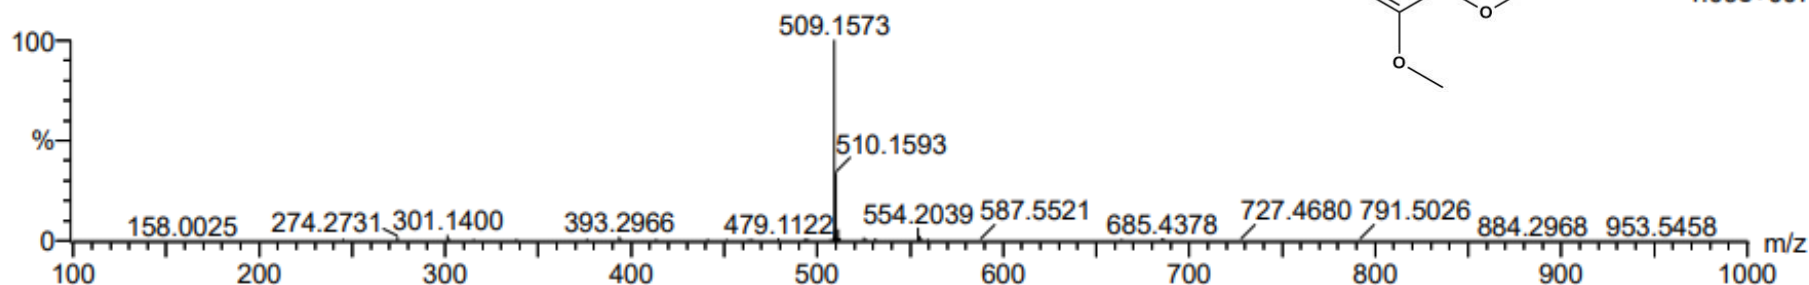

Minimum: -1.5  
Maximum: 2.0 5.0 50.0

| Mass     | Calc. Mass | mDa | PPM | DBE  | i-FIT  | Norm | Conf (%) | Formula       |
|----------|------------|-----|-----|------|--------|------|----------|---------------|
| 509.1573 | 509.1573   | 0.0 | 0.0 | 20.5 | 1298.2 | n/a  | n/a      | C27 H21 N6 O5 |

# SPECTRAL DATA OF 5aa

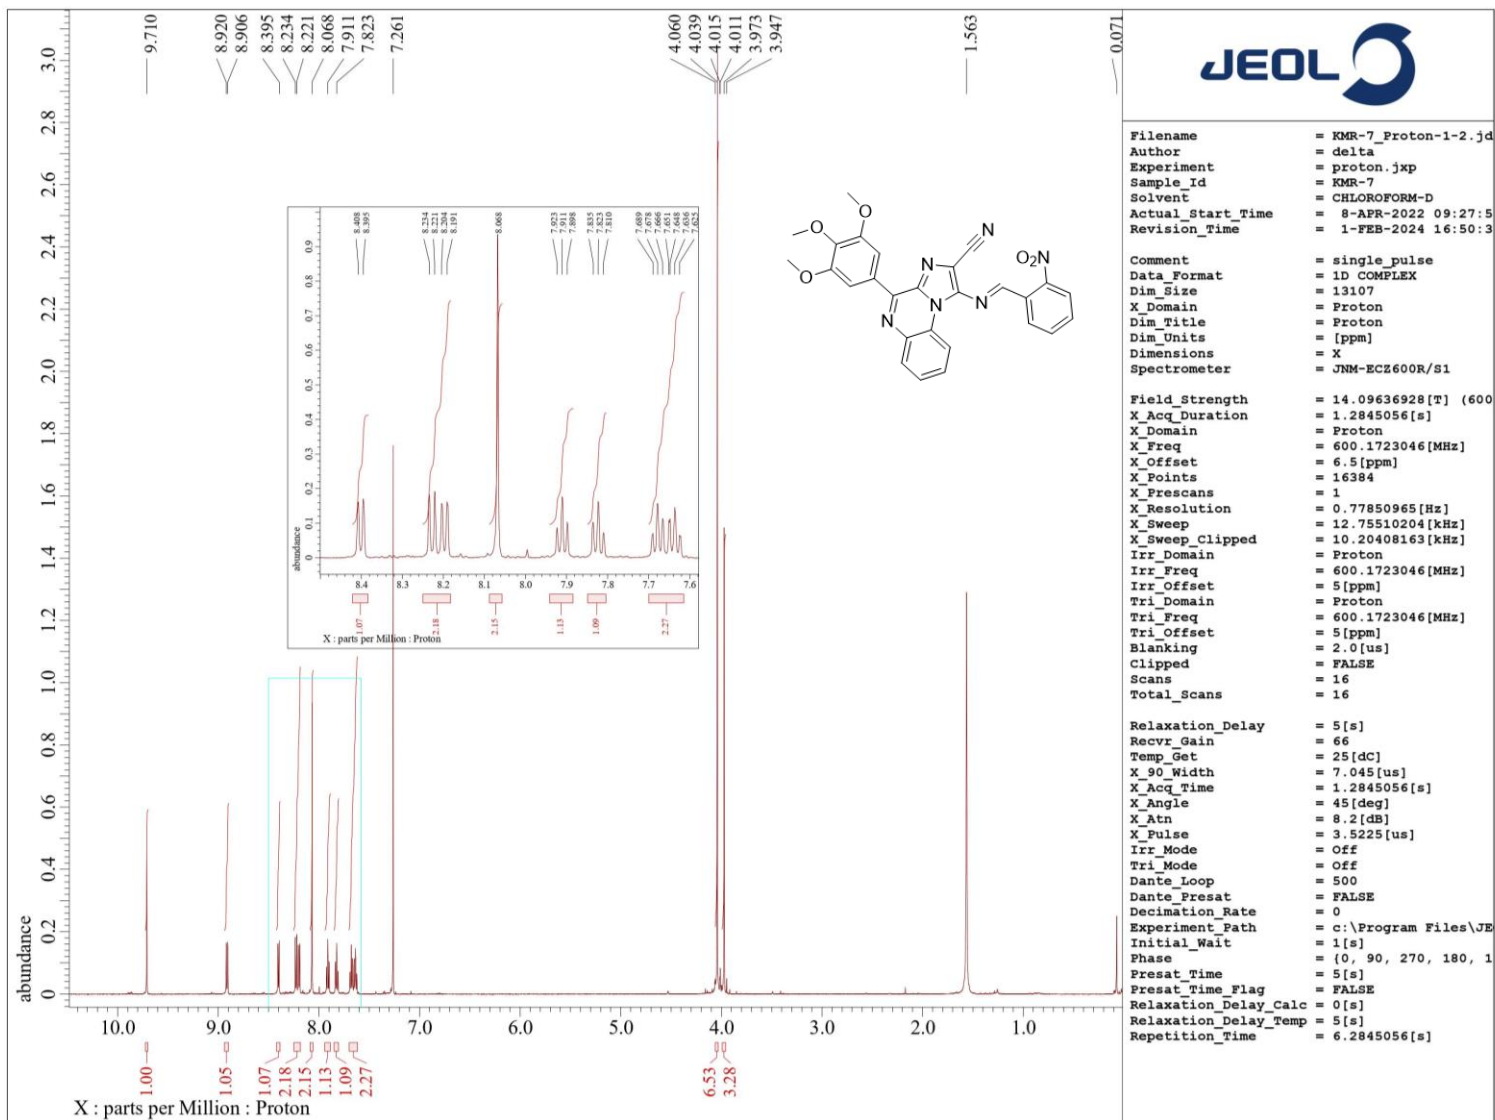



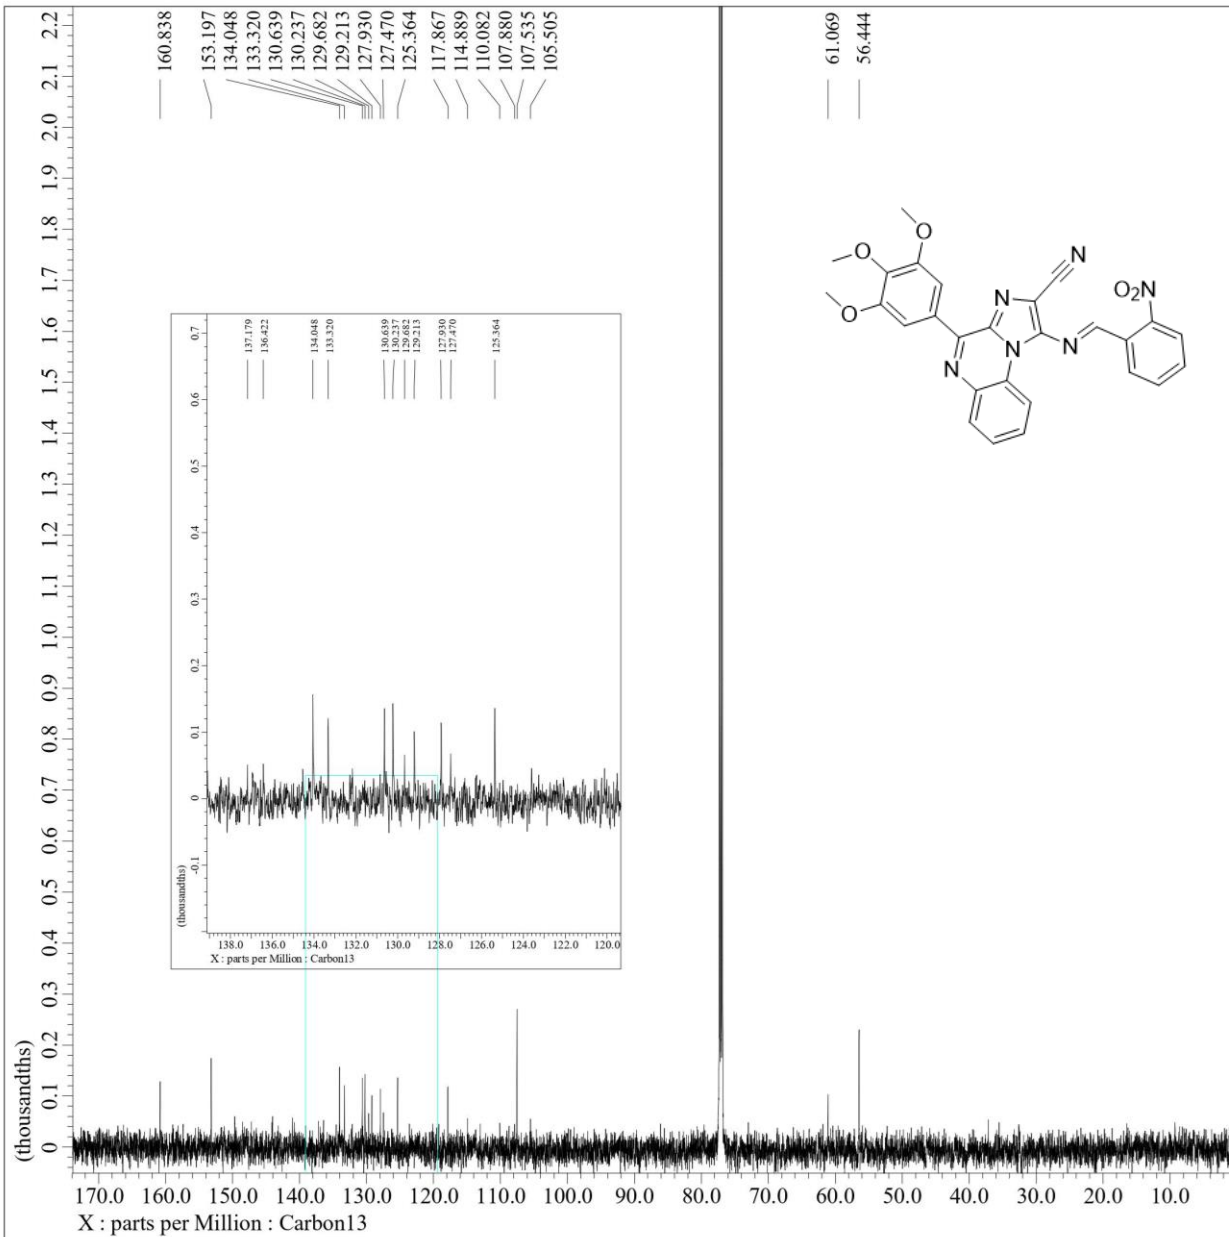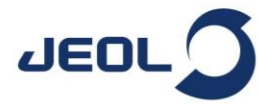

|                          |                     |
|--------------------------|---------------------|
| Filename                 | = KMR-7_Carbon-1-2  |
| Author                   | = delta             |
| Experiment               | = carbon.jxp        |
| Sample Id                | = KMR-7             |
| Solvent                  | = CHLOROFORM-D      |
| Actual_Start_Time        | = 8-APR-2022 09:3   |
| Revision_Time            | = 20-APR-2022 15:4  |
| Comment                  | = single pulse dec  |
| Data_Format              | = 1D COMPLEX        |
| Dim_Size                 | = 26214             |
| X_Domain                 | = Carbon13          |
| Dim_Title                | = Carbon13          |
| Dim_Units                | = [ppm]             |
| Dimensions               | = X                 |
| Spectrometer             | = JNM-ECZ600R/S1    |
| Field_Strength           | = 14.09636928[T] (  |
| X_Acq_Duration           | = 0.69206016[s]     |
| X_Domain                 | = Carbon13          |
| X_Freq                   | = 150.91343039[MHz] |
| X_Offset                 | = 100[ppm]          |
| X_Points                 | = 32768             |
| X_Prescans               | = 4                 |
| X_Resolution             | = 1.44496109[Hz]    |
| X_Sweep                  | = 47.34848485[kHz]  |
| X_Sweep_Clippped         | = 37.87878788[kHz]  |
| Irr_Domain               | = Proton            |
| Irr_Freq                 | = 600.1723046[MHz]  |
| Irr_Offset               | = 5[ppm]            |
| Blanking                 | = 2.0[us]           |
| Clipped                  | = FALSE             |
| Scans                    | = 512               |
| Total_Scans              | = 512               |
| Relaxation_Delay         | = 2[s]              |
| Recvr_Gain               | = 36                |
| Temp_Get                 | = 25[dC]            |
| X_90_Width               | = 11.025[us]        |
| X_Acq_Time               | = 0.69206016[s]     |
| X_Angle                  | = 30[deg]           |
| X_Atn                    | = 10.4[dB]          |
| X_Pulse                  | = 3.675[us]         |
| Irr_Atn_Dec              | = 28.859[dB]        |
| Irr_Atn_Dec_Calc         | = 28.859[dB]        |
| Irr_Atn_Dec_Default_Calc | = 28.859[dB]        |
| Irr_Atn_No               | = 28.859[dB]        |
| Irr_Dec_Bandwidth_Hz     | = 7.23684211[kHz]   |
| Irr_Dec_Bandwidth_Ppm    | = 12.05794078[ppm]  |
| Irr_Dec_Freq             | = 600.1723046[MHz]  |
| Irr_Dec_Merit_Factor     | = 2.2               |
| Irr_Decoupling           | = TRUE              |
| Irr_No                   | = TRUE              |
| Irr_Noise                | = WALTZ             |
| Irr_Offset_Default       | = 5[ppm]            |
| Irr_Pwidth               | = 76[us]            |
| Irr_Pwidth_Default       | = 76[us]            |
| Irr_Pwidth_Default_Calc  | = 76[us]            |
| Irr_Pwidth_Temp1         | = 76[us]            |
| Irr_Wurst                | = FALSE             |
| Decimation_Rate          | = 0                 |
| Experiment_Path          | = c:\Program Files  |
| Initial_Wait             | = 1[s]              |
| Noe_Time                 | = 2[s]              |

# Elemental Composition Report

## Single Mass Analysis

Tolerance = 5.0 PPM / DBE: min = -1.5, max = 50.0

Element prediction: Off

Number of isotope peaks used for i-FIT = 5

Monoisotopic Mass, Even Electron Ions

1869 formula(e) evaluated with 10 results within limits (up to 1 closest results for each mass)

Elements Used:

C: 1-60 H: 1-100 N: 0-10 O: 0-10 S: 0-2

Sample Name : KMR\_7

Test Name :

260522\_KMR\_7 16 (0.177)

IITRPR

XEVO G2-XS QTOF

1: TOF MS ES+  
2.14e+007

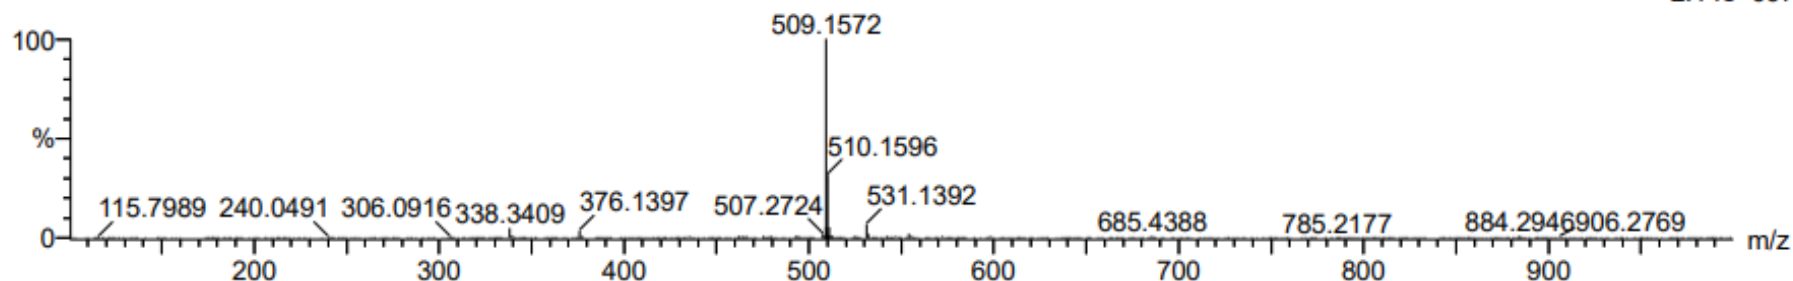

Minimum: -1.5  
Maximum: 2.0 5.0 50.0

| Mass     | Calc. Mass | mDa  | PPM  | DBE  | i-FIT | Norm | Conf (%) | Formula       |
|----------|------------|------|------|------|-------|------|----------|---------------|
| 509.1572 | 509.1573   | -0.1 | -0.2 | 20.5 | 673.0 | n/a  | n/a      | C27 H21 N6 O5 |

# SPECTRAL DATA OF 5ab

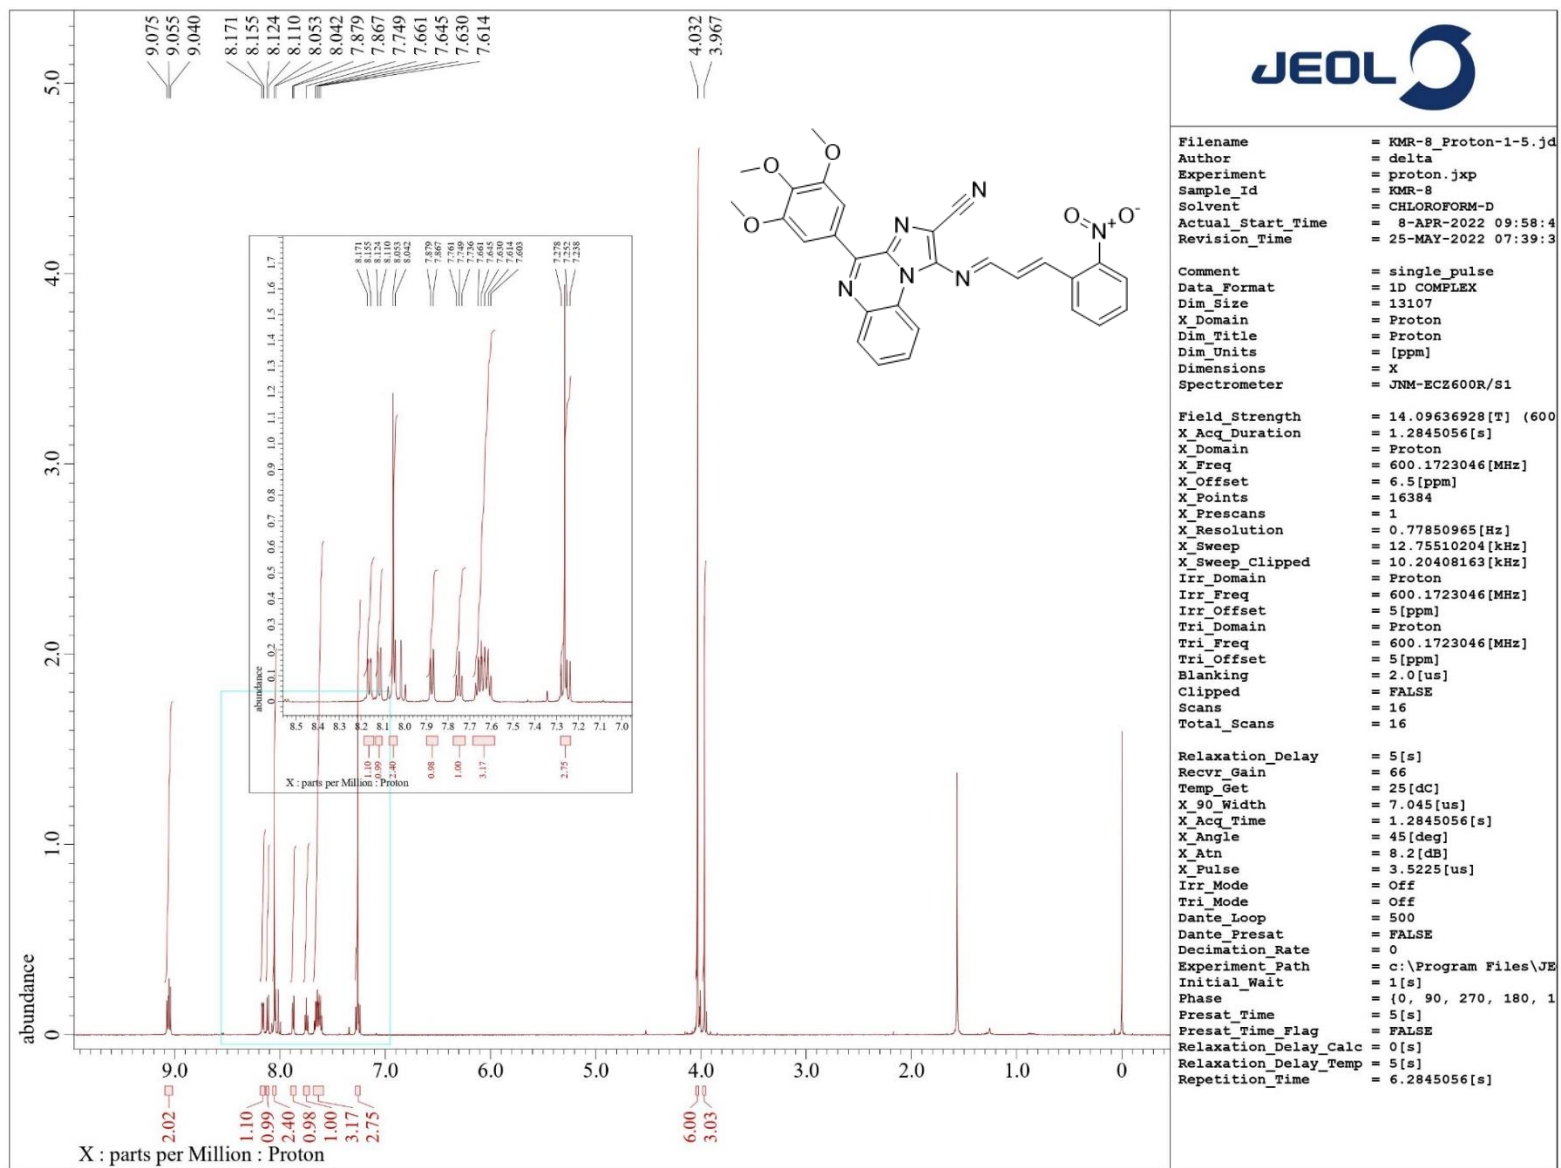

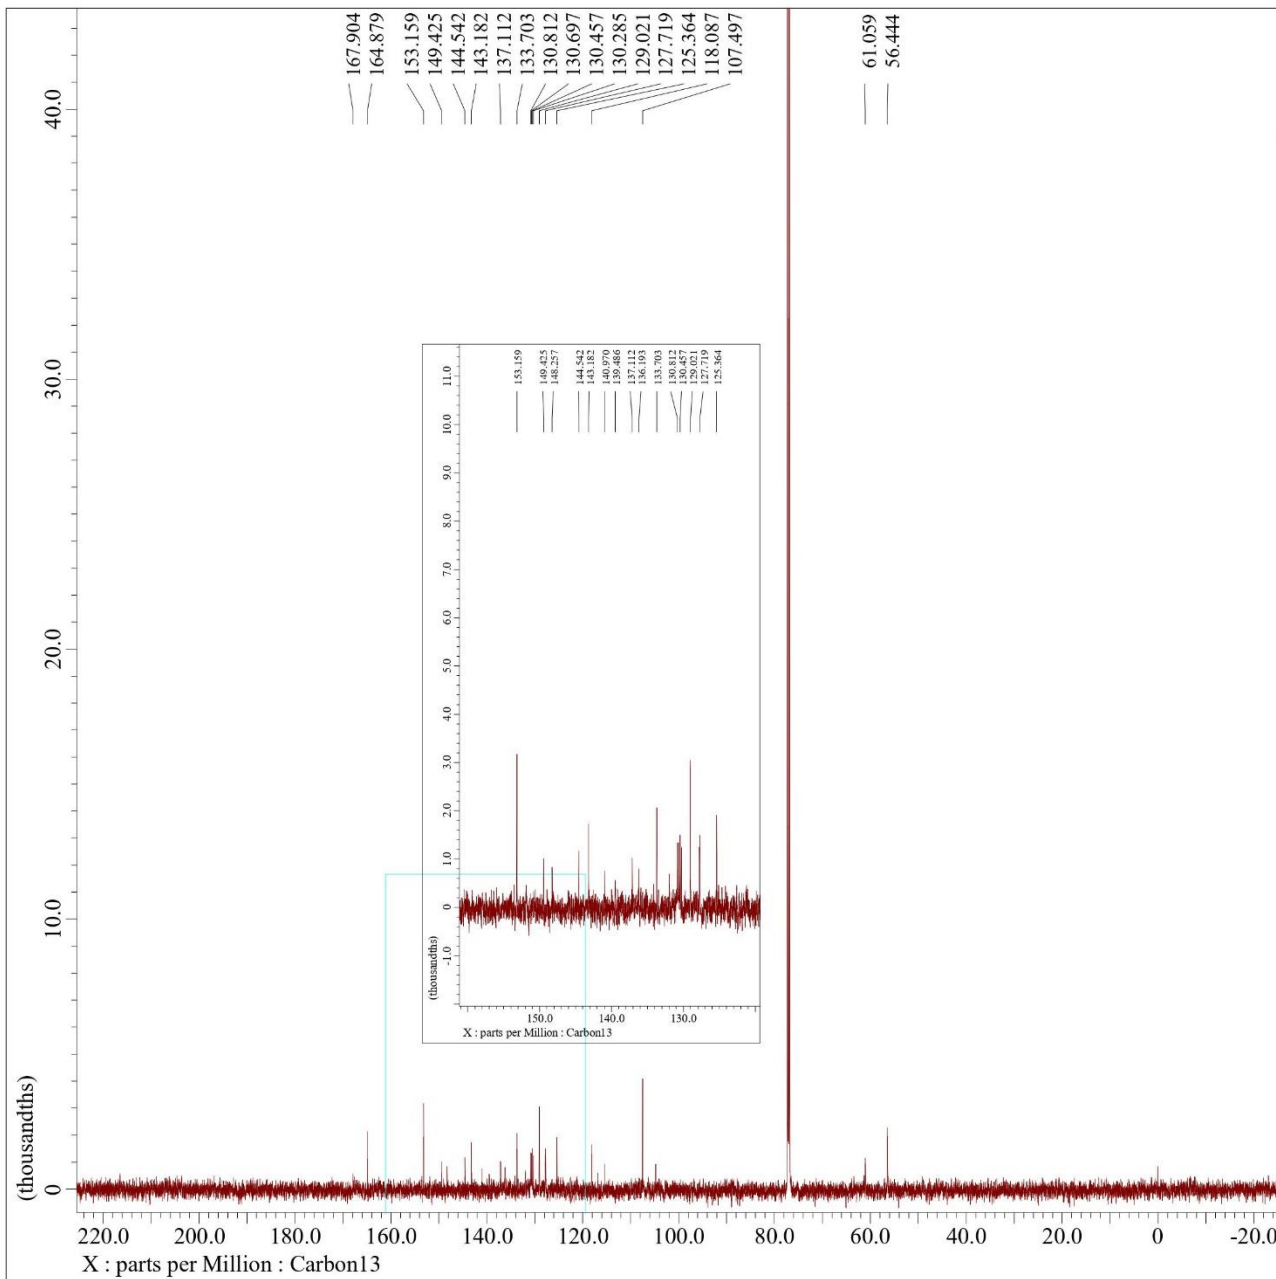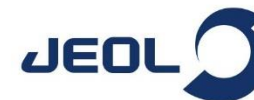

```

Filename           = KMR-8_Carbon NMR
Author             = delta
Experiment         = carbon.jxp
Sample Id          = KMR-8
Solvent            = CHLOROFORM-D
Actual_Start_Time  = 8-APR-2022 10:0
Revision_Time      = 18-MAY-2022 12:1

Comment           = single pulse dec
Data_Format       = 1D COMPLEX
Dim_Size          = 26214
X_Domain          = Carbon13
Dim_Title         = Carbon13
Dim_Units         = [ppm]
Dimensions        = X
Spectrometer      = JNM-ECZ600R/S1

Field_Strength    = 14.09636928[T] (
X_Acq_Duration    = 0.69206016[s]
X_Domain          = Carbon13
X_Freq            = 150.91343039[MHz]
X_Offset          = 100[ppm]
X_Points          = 32768
X_Prescans        = 4
X_Resolution      = 1.44496109[Hz]
X_Sweep           = 47.34848485[kHz]
X_Sweep_Clipped   = 37.87878788[kHz]
Irr_Domain        = Proton
Irr_Freq          = 600.1723046[MHz]
Irr_Offset        = 5[ppm]
Blanking          = 2.0[us]
Clipped           = TRUE
Scans             = 512
Total_Scans       = 512

Relaxation_Delay  = 2[s]
Recvr_Gain        = 56
Temp_Get          = 25[dC]
X_90_Width        = 11.025[us]
X_Acq_Time        = 0.69206016[s]
X_Angle           = 30[deg]
X_Atn             = 10.4[dB]
X_Pulse           = 3.675[us]
Irr_Atn_Dec       = 28.859[dB]
Irr_Atn_Dec_Calc = 28.859[dB]
Irr_Atn_Dec_Default_Calc = 28.859[dB]
Irr_Atn_Noise     = 28.859[dB]
Irr_Dec_Bandwidth_Hz = 7.23684211[kHz]
Irr_Dec_Bandwidth_Ppm = 12.05794078[ppm]
Irr_Dec_Freq      = 600.1723046[MHz]
Irr_Dec_Merit_Factor = 2.2
Irr_Decoupling    = TRUE
Irr_Noise         = TRUE
Irr_Noise         = WALTZ
Irr_Offset_Default = 5[ppm]
Irr_Pwidth        = 76[us]
Irr_Pwidth_Default = 76[us]
Irr_Pwidth_Default_Calc = 76[us]
Irr_Pwidth_Templ = 76[us]
Irr_Wurst         = FALSE
Decimation_Rate   = 0
Experiment_Path    = c:\Program Files
Initial_Wait       = 1[s]
Noe_Time          = 2[s]

```

## Single Mass Analysis

Tolerance = 5.0 PPM / DBE: min = -1.5, max = 50.0

Element prediction: Off

Number of isotope peaks used for i-FIT = 5

Monoisotopic Mass, Even Electron Ions

1975 formula(e) evaluated with 10 results within limits (up to 1 closest results for each mass)

Elements Used:

C: 1-60 H: 1-100 N: 0-10 O: 0-10 S: 0-2

Sample Name : KMR\_8

Test Name :

260522\_KMR\_8 19 (0.214)

IITRPR

XEVO G2-XS QTOF

1: TOF MS ES+

1.44e+007

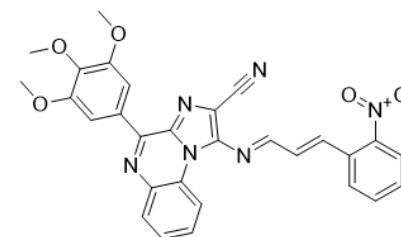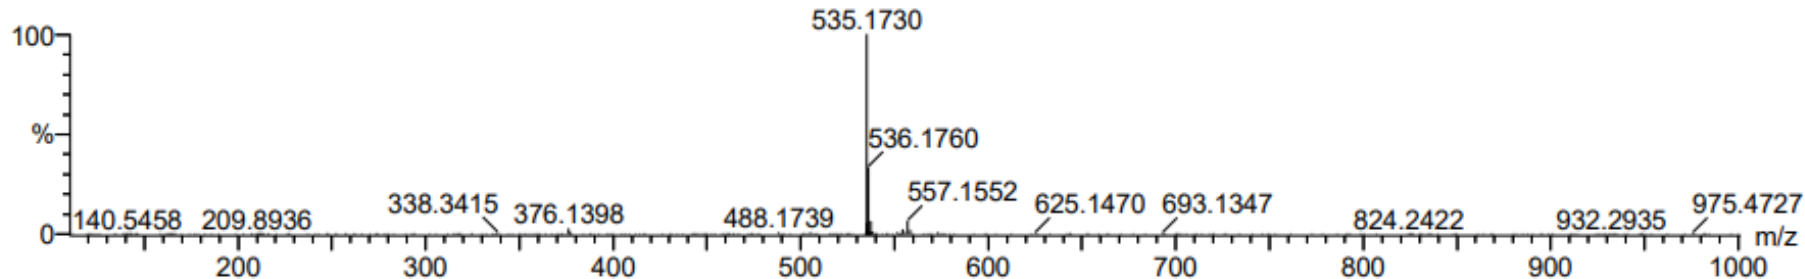

Minimum: -1.5

Maximum: 2.0 5.0 50.0

| Mass     | Calc. Mass | mDa | PPM | DBE  | i-FIT | Norm | Conf(%) | Formula       |
|----------|------------|-----|-----|------|-------|------|---------|---------------|
| 535.1730 | 535.1730   | 0.0 | 0.0 | 21.5 | 451.5 | n/a  | n/a     | C29 H23 N6 O5 |



# SPECTRAL DATA OF 5ac

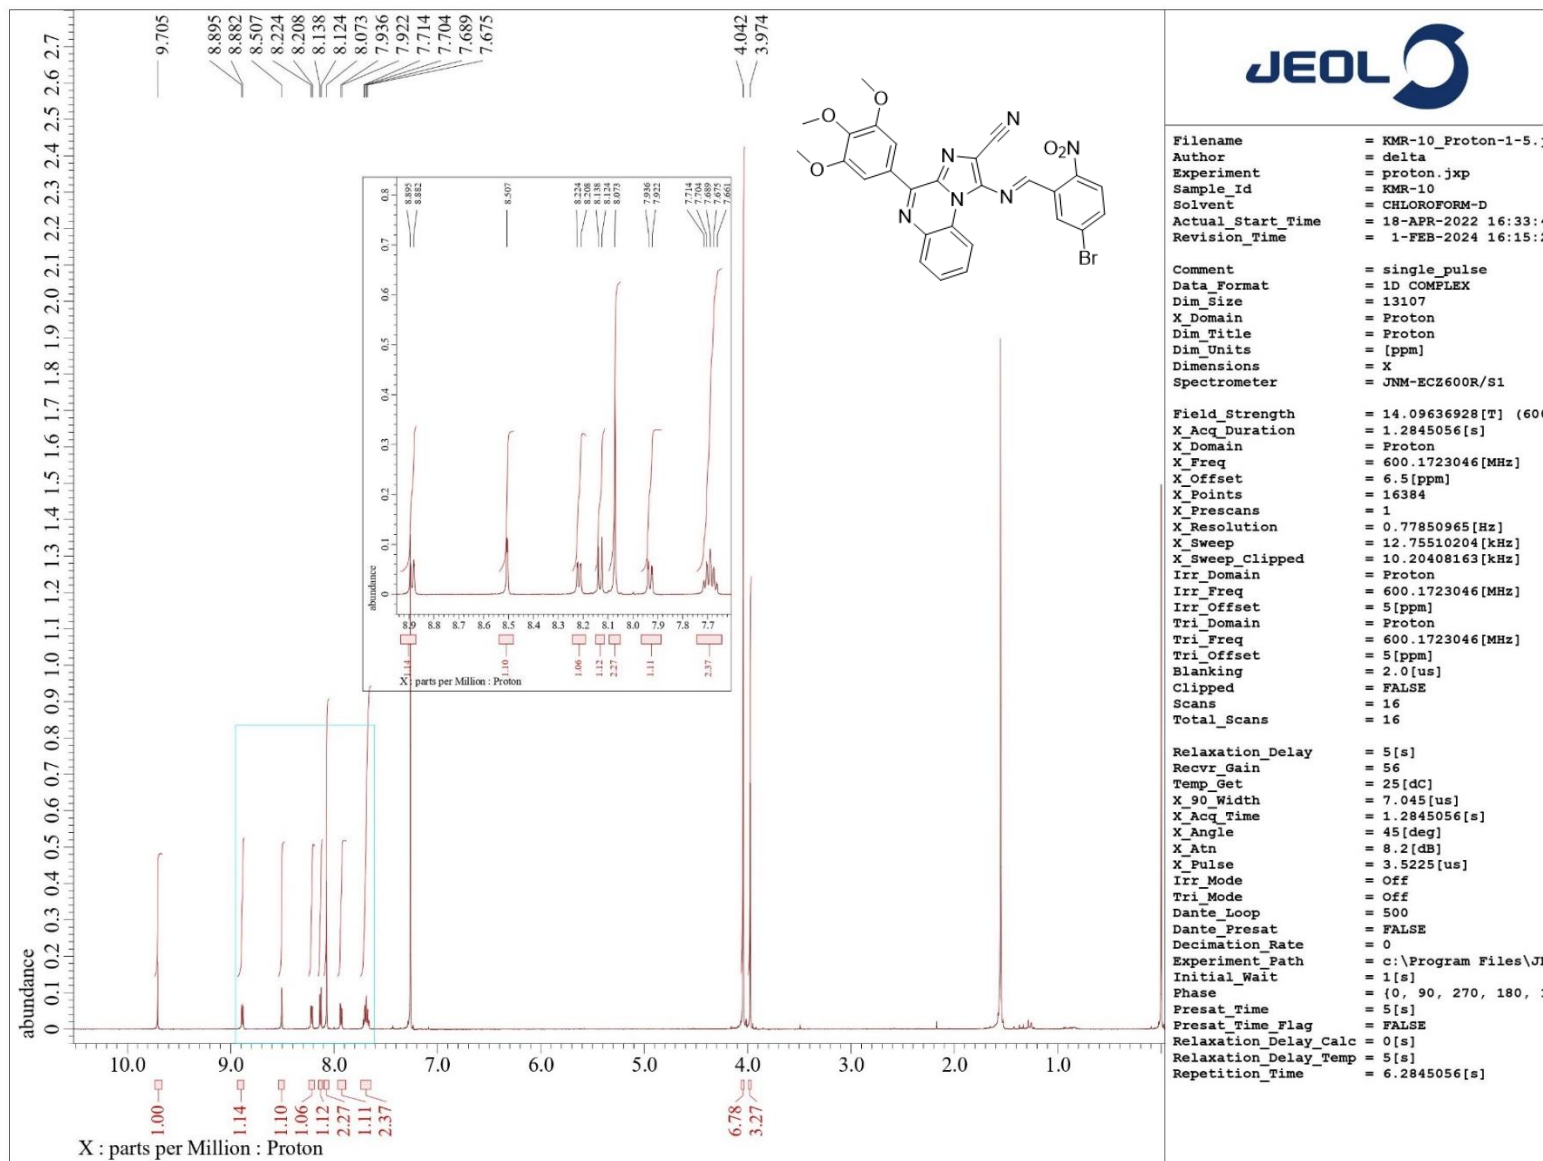

# Elemental Composition Report

## Single Mass Analysis

Tolerance = 5.0 PPM / DBE: min = -1.5, max = 50.0

Element prediction: Off

Number of isotope peaks used for i-FIT = 5

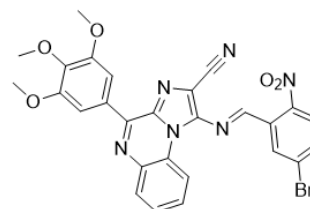

Monoisotopic Mass, Even Electron Ions

5463 formula(e) evaluated with 36 results within limits (up to 1 closest results for each mass)

Elements Used:

C: 1-60 H: 1-100 N: 0-10 O: 0-10 S: 0-2 Br: 0-2

Sample Name : KMR\_10  
Test Name :  
260522\_KMR\_10 16 (0.177)

IITRPR

XEVO G2-XS QTOF

1: TOF MS ES+  
3.40e+006

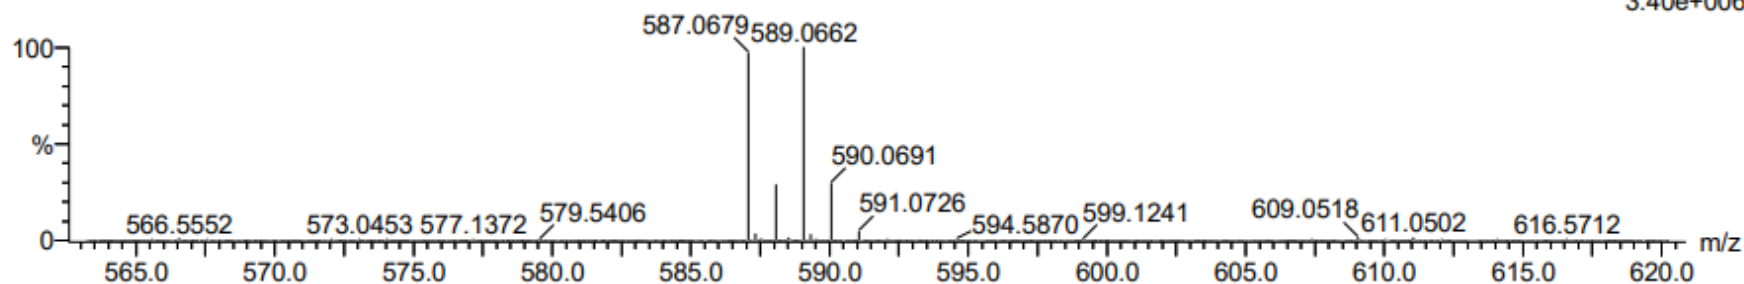

Minimum: -1.5  
Maximum: 2.0 5.0 50.0

| Mass     | Calc. Mass | mDa | PPM | DBE  | i-FIT  | Norm | Conf (%) | Formula          |
|----------|------------|-----|-----|------|--------|------|----------|------------------|
| 587.0679 | 587.0679   | 0.0 | 0.0 | 20.5 | 1171.3 | n/a  | n/a      | C27 H20 N6 O5 Br |
